# Supplementary material
Source: MDPI journal article supplement (https://www.mdpi.com/1424-2818/15/2/174)
Supplement: s1 [file s1]

# BOLD TaxonID Tree

Title : Tree Result - Search: BIN URIs; Include public records (5226 records returned) (5226 records selected)

Date : 20-Apr-2022

Data Type : Nucleotide

Distance Model : Kimura 2 Parameter

Marker : COI-5P

Colourization : [blue]=Stop Codons [red]=Contamination or misidentification

Label : Process ID

Label : Taxon

Label : Country

Label : Barcode Cluster (BIN)

Label : GenBank Accession

Sequence Count : 5226

Species count : 90

Genus count : 85

Family count : 75

Unidentified : 111

BIN Count : 258

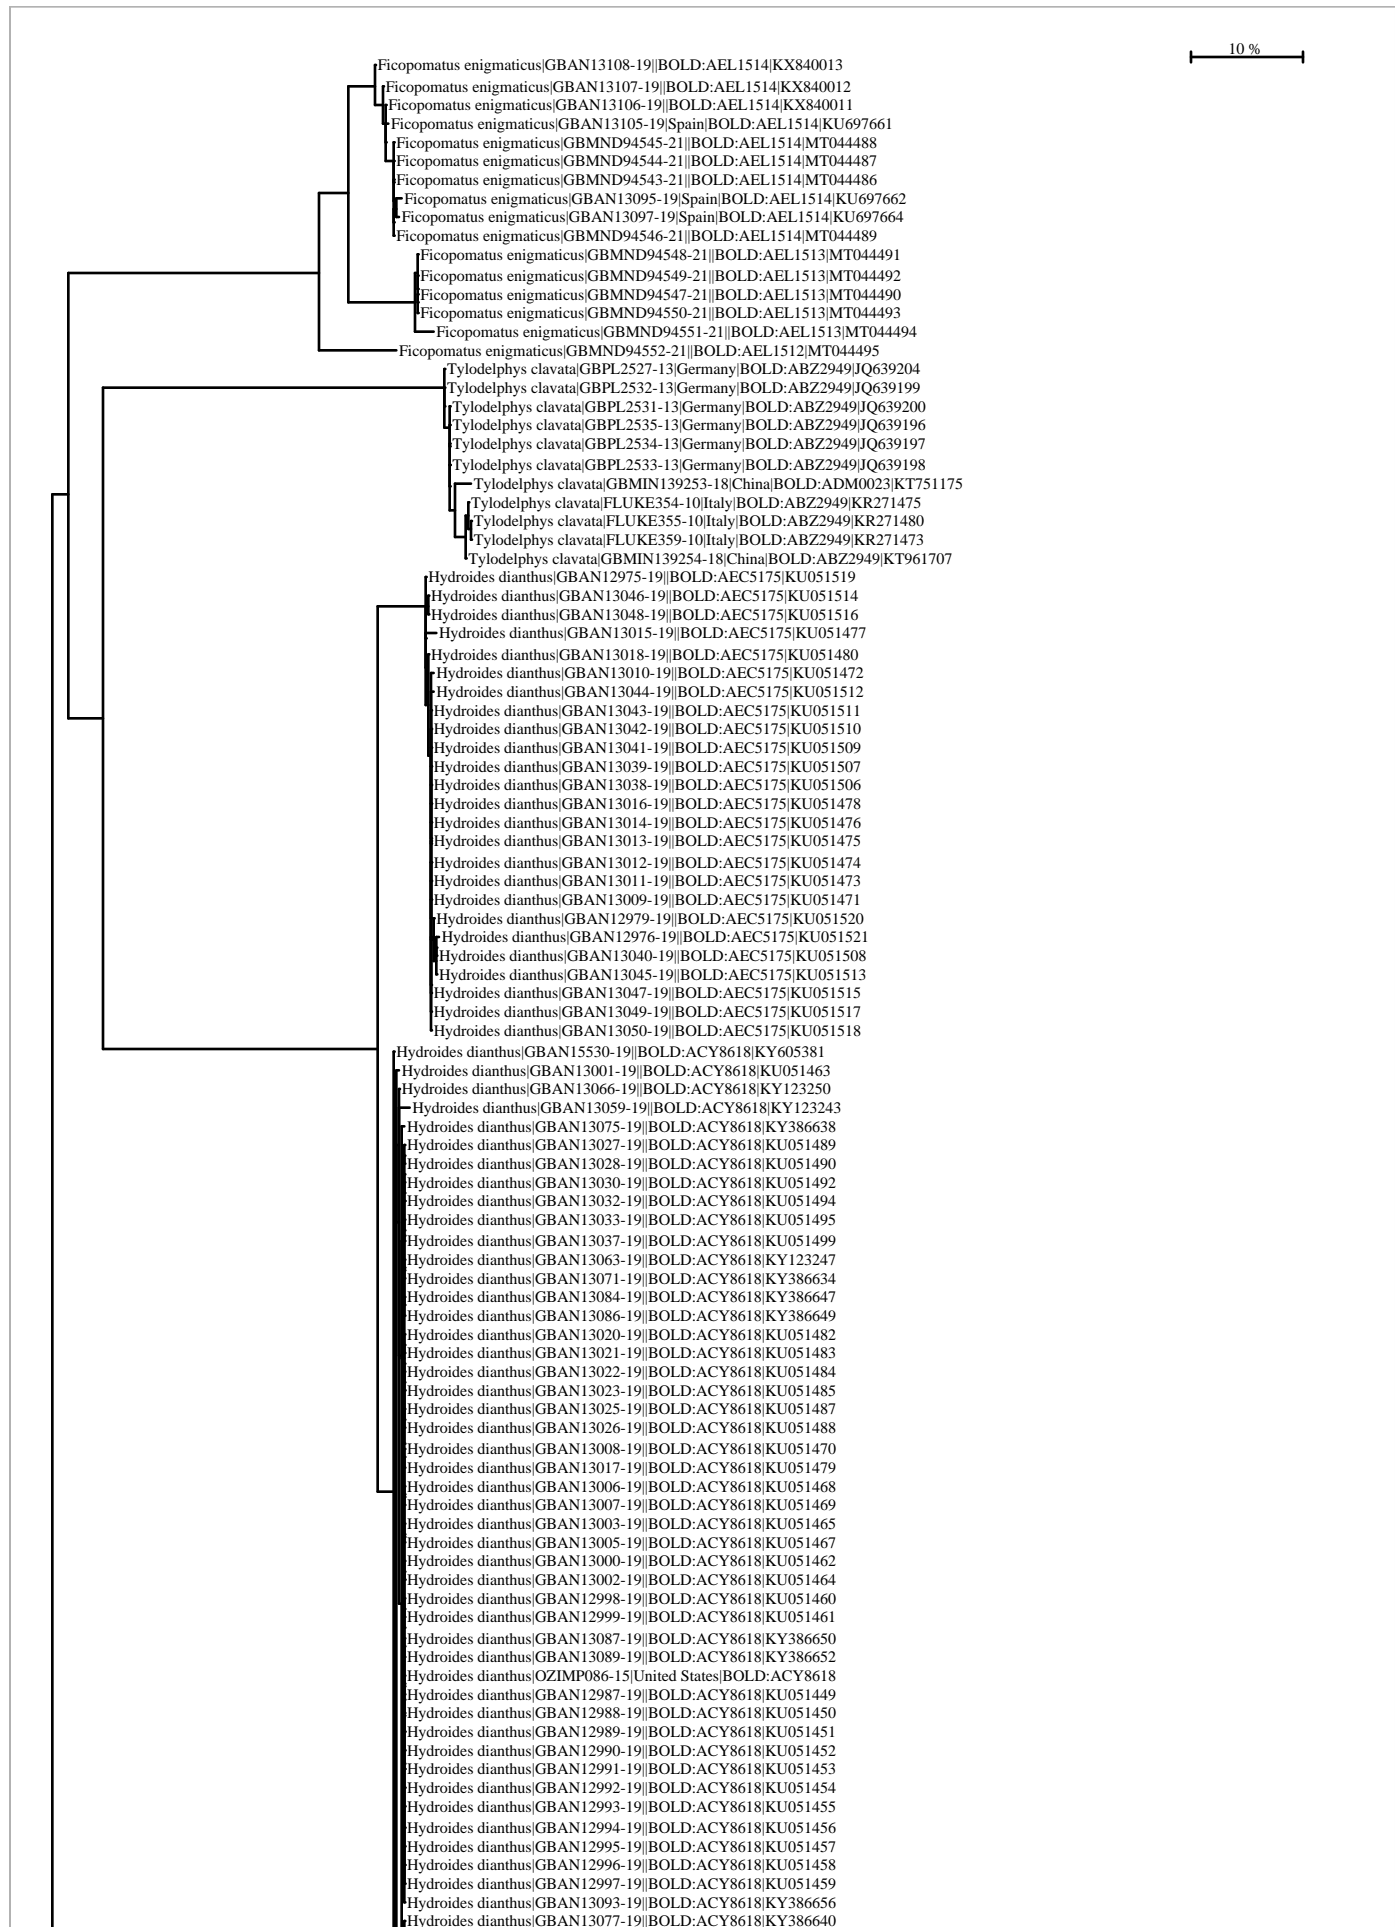

Hydroïdes dianthus|GBAN12997-19||BOLD:ACY8618|KU051459

Hydroïdes dianthus|GBAN13093-19||BOLD:ACY8618|KY386656

Hydroïdes dianthus|GBAN13077-19||BOLD:ACY8618|KY386640

Hydroïdes dianthus|GBAN13072-19||BOLD:ACY8618|KY386635

Hydroïdes dianthus|GBAN13065-19||BOLD:ACY8618|KY123249

Hydroïdes dianthus|GBAN13051-19||BOLD:ACY8618|KY123235

Hydroïdes dianthus|GBAN13052-19||BOLD:ACY8618|KY123236

Hydroïdes dianthus|GBAN13035-19||BOLD:ACY8618|KU051497

Hydroïdes dianthus|GBAN13036-19||BOLD:ACY8618|KU051498

Hydroïdes dianthus|GBAN13031-19||BOLD:ACY8618|KU051493

Hydroïdes dianthus|GBAN13034-19||BOLD:ACY8618|KU051496

Hydroïdes dianthus|GBAN13029-19||BOLD:ACY8618|KU051491

Hydroïdes dianthus|GBAN13024-19||BOLD:ACY8618|KU051486

Hydroïdes dianthus|GBAN13019-19||BOLD:ACY8618|KU051481

Hydroïdes dianthus|GBAN13004-19||BOLD:ACY8618|KU051466

Hydroïdes dianthus|GBAN13090-19||BOLD:ACY8618|KY386653

Hydroïdes dianthus|GBAN13081-19||BOLD:ACY8618|KY386644

Hydroïdes dianthus|GBAN13082-19||BOLD:ACY8618|KY386645

Hydroïdes dianthus|GBAN13083-19||BOLD:ACY8618|KY386646

Hydroïdes dianthus|GBAN13085-19||BOLD:ACY8618|KY386648

Hydroïdes dianthus|GBAN13088-19||BOLD:ACY8618|KY386651

Hydroïdes dianthus|GBAN13091-19||BOLD:ACY8618|KY386654

Hydroïdes dianthus|GBAN13057-19||BOLD:ACY8618|KY123241

Hydroïdes dianthus|GBAN13058-19||BOLD:ACY8618|KY123242

Hydroïdes dianthus|GBAN13055-19||BOLD:ACY8618|KY123239

Hydroïdes dianthus|GBAN13056-19||BOLD:ACY8618|KY123240

Hydroïdes dianthus|GBAN13053-19||BOLD:ACY8618|KY123237

Hydroïdes dianthus|GBAN13054-19||BOLD:ACY8618|KY123238

Hydroïdes dianthus|GBAN13060-19||BOLD:ACY8618|KY123244

Hydroïdes dianthus|GBAN13061-19||BOLD:ACY8618|KY123245

Hydroïdes dianthus|GBAN13062-19||BOLD:ACY8618|KY123246

Hydroïdes dianthus|GBAN13064-19||BOLD:ACY8618|KY123248

Hydroïdes dianthus|GBAN13076-19||BOLD:ACY8618|KY386639

Hydroïdes dianthus|GBAN13078-19||BOLD:ACY8618|KY386641

Hydroïdes dianthus|GBAN13079-19||BOLD:ACY8618|KY386642

Hydroïdes dianthus|GBAN13080-19||BOLD:ACY8618|KY386643

Hydroïdes dianthus|GBAN13073-19||BOLD:ACY8618|KY386636

Hydroïdes dianthus|GBAN13074-19||BOLD:ACY8618|KY386637

Hydroïdes dianthus|GBAN13067-19||BOLD:ACY8618|KY386630

Hydroïdes dianthus|GBAN13068-19||BOLD:ACY8618|KY386631

Hydroïdes dianthus|GBAN13069-19||BOLD:ACY8618|KY386632

Hydroïdes dianthus|GBAN13070-19||BOLD:ACY8618|KY386633

Hydroïdes dianthus|GBAN13092-19||BOLD:ACY8618|KY386655

Hydroïdes dianthus|GBAN13094-19||BOLD:ACY8618|KY386657

Hydroïdes dianthus|GBMND94553-21||BOLD:ACY8618|MT044497

Ostrea chilensis|MOLNZ162-09|New Zealand|BOLD:AAF2216|GU806091

Ostrea chilensis|MOLNZ164-09|New Zealand|BOLD:AAF2216|GU806092

Ostrea chilensis|MOLNZ339-09|New Zealand|BOLD:AAF2216|GU806125

Ostrea chilensis|GBMLB4967-13||BOLD:ACH5602|JF301931

Ostrea chilensis|GBMLB4970-13||BOLD:ACH5603|JF301917

Ostrea chilensis|GBMLB4968-13||BOLD:ACH5603|JF301922

Ostrea chilensis|GBMLB4969-13||BOLD:ACH5603|JF301920

Ostrea chilensis|GBML5112-19||BOLD:ACH5603|JF301929

Ostrea chilensis|GBML5113-19||BOLD:ACH5603|JF301924

Ostrea chilensis|GBML5114-19||BOLD:ACH5603|JF301921

Crassostrea virginica|GBMLB3963-09|United States|BOLD:AAA3345|FJ693040

Crassostrea virginica|GBMLB3969-09|United States|BOLD:AAA3345|FJ693033

Crassostrea virginica|GBMLB3959-09|United States|BOLD:AAA3345|FJ693045

Crassostrea virginica|GBMLB3922-09|United States|BOLD:AAA3345|FJ693082

Crassostrea virginica|GBMLB4544-09||BOLD:AAA3345|FJ973644

Crassostrea virginica|GBMLB4530-09||BOLD:AAA3345|FJ973658

Crassostrea virginica|GBMLB4551-09||BOLD:AAA3345|FJ973637

Crassostrea virginica|GBMLB3968-09|United States|BOLD:AAA3345|FJ693034

Crassostrea virginica|GBMLB3966-09|United States|BOLD:AAA3345|FJ693037

Crassostrea virginica|GBMLB3961-09|United States|BOLD:AAA3345|FJ693043

Crassostrea virginica|GBMLB3960-09|United States|BOLD:AAA3345|FJ693044

Crassostrea virginica|GBMLB3958-09|United States|BOLD:AAA3345|FJ693046

Crassostrea virginica|GBMLB3849-09|United States|BOLD:AAA3345|FJ693035

Crassostrea virginica|GBMLB3848-09|United States|BOLD:AAA3345|FJ693041

Crassostrea virginica|GBMLB3967-09|United States|BOLD:AAA3345|FJ693036

Crassostrea virginica|GBMLB3965-09|United States|BOLD:AAA3345|FJ693038

Crassostrea virginica|GBMLB3950-09|United States|BOLD:AAA3345|FJ693054

Crassostrea virginica|GBMLB4532-09||BOLD:AAA3345|FJ973656

Crassostrea virginica|GBMLB3974-09|United States|BOLD:AAA3345|FJ693028

Crassostrea virginica|GBMLB3948-09|United States|BOLD:AAA3345|FJ693056

Crassostrea virginica|GBMLB3987-09|United States|BOLD:AAA3345|FJ693015

Crassostrea virginica|GBMLB3956-09|United States|BOLD:AAA3345|FJ693048

Crassostrea virginica|GBMLB4547-09||BOLD:AAA3345|FJ973641

Crassostrea virginica|GBMLB3938-09|United States|BOLD:AAA3345|FJ693066

Crassostrea virginica|GBMLB4531-09||BOLD:AAA3345|FJ973657

Crassostrea virginica|GBMLB3926-09|United States|BOLD:AAA3345|FJ693078

Crassostrea virginica|GBMLB3929-09|United States|BOLD:AAA3345|FJ693075

Crassostrea virginica|GBMLB4546-09||BOLD:AAA3345|FJ973642

Crassostrea virginica|GBMLB4548-09||BOLD:AAA3345|FJ973640

Crassostrea virginica|GBMLB3930-09|United States|BOLD:AAA3345|FJ693074

Crassostrea virginica|GBMLB4529-09||BOLD:AAA3345|FJ973659

Crassostrea virginica|GBMLB4523-09||BOLD:AAA3345|FJ973665

Crassostrea virginica|GBMLB3923-09|United States|BOLD:AAA3345|FJ693081

Crassostrea virginica|GBMLB4541-09||BOLD:AAA3345|FJ973647

Crassostrea virginica|GBMLB3920-09|United States|BOLD:AAA3345|FJ693084

Crassostrea virginica|GBMLB4554-09||BOLD:AAA3345|FJ973634

Crassostrea virginica|GBMLB4545-09||BOLD:AAA3345|FJ973643

Crassostrea virginica|GBMLB3919-09|United States|BOLD:AAA3345|FJ693085

Crassostrea virginica|GBMLB3917-09|United States|BOLD:AAA3345|FJ693087

Crassostrea virginica|GBMLB3951-09|United States|BOLD:AAA3345|FJ693053

Crassostrea virginica|GBMLB4526-09||BOLD:AAA3345|FJ973662

Crassostrea virginica|GBMLB4521-09||BOLD:AAA3345|FJ973667

Crassostrea virginica|GBMLB3964-09|United States|BOLD:AAA3345|FJ693039

Crassostrea virginica|GBMLB3931-09|United States|BOLD:AAA3345|FJ693073

Crassostrea virginica|GBMLB4550-09||BOLD:AAA3345|FJ973638

Crassostrea virginica|GBMLB4538-09||BOLD:AAA3345|FJ973650

Crassostrea virginica|GBMLB4536-09||BOLD:AAA3345|FJ973649

Crassostrea virginica|GBMLB4550-09||BOLD:AAA3345|FJ973638  
Crassostrea virginica|GBMLB4538-09||BOLD:AAA3345|FJ973650  
Crassostrea virginica|GBMLB4536-09||BOLD:AAA3345|FJ973652  
Crassostrea virginica|GBMLB3915-09|United States|BOLD:AAA3345|FJ693089  
Crassostrea virginica|GBMLB4542-09||BOLD:AAA3345|FJ973646  
Crassostrea virginica|GBMLB4549-09||BOLD:AAA3345|FJ973639  
Crassostrea virginica|GBMLB4535-09||BOLD:AAA3345|FJ973653  
Crassostrea virginica|GBMLB4534-09||BOLD:AAA3345|FJ973654  
Crassostrea virginica|GBMLB4528-09||BOLD:AAA3345|FJ973660  
Crassostrea virginica|GBMLB3949-09|United States|BOLD:AAA3345|FJ693055  
Crassostrea virginica|GBMLB3925-09|United States|BOLD:AAA3345|FJ693079  
Crassostrea virginica|GBMLB4533-09||BOLD:AAA3345|FJ973655  
Crassostrea virginica|ECMOL350-11|Canada|BOLD:AAA3345|KF644323  
Crassostrea virginica|GBMLB4552-09||BOLD:AAA3345|FJ973636  
Crassostrea virginica|GBMLB3908-09|United States|BOLD:AAA3345|FJ693096  
Crassostrea virginica|GBMLB3976-09|United States|BOLD:AAA3345|FJ693026  
Crassostrea virginica|GBMLB4525-09||BOLD:AAA3345|FJ973663  
Crassostrea virginica|GBMLB3924-09|United States|BOLD:ACV7858|FJ693080  
Crassostrea virginica|GBMLB3928-09|United States|BOLD:ACV7858|FJ693076  
Crassostrea virginica|GBMLB3978-09|United States|BOLD:ACV7858|FJ693024  
Crassostrea virginica|GBMLB5240-13||BOLD:ACV7858|JX468902  
Crassostrea virginica|GBMLB5241-13||BOLD:ACV7858|JX468901  
Crassostrea virginica|GBMLB6115-14||BOLD:ACV7858|KC429098  
Crassostrea virginica|GBMLB3985-09|United States|BOLD:AAA3345|FJ693017  
Crassostrea virginica|GBMLB3980-09|United States|BOLD:AAA3345|FJ693022  
Crassostrea virginica|GBMLB3981-09|United States|BOLD:AAA3345|FJ693021  
Crassostrea virginica|GBMLB3932-09|United States|BOLD:AAA3345|FJ693072  
Crassostrea virginica|GBMLB3970-09|United States|BOLD:AAA3345|FJ693032  
Crassostrea virginica|GBMLB3971-09|United States|BOLD:AAA3345|FJ693031  
Crassostrea virginica|GBMLB3975-09|United States|BOLD:AAA3345|FJ693027  
Crassostrea virginica|GBMLB3972-09|United States|BOLD:AAA3345|FJ693030  
Crassostrea virginica|GBMLB3921-09|United States|BOLD:AAA3345|FJ693083  
Crassostrea virginica|GBMLB3946-09|United States|BOLD:AAA3345|FJ693058  
Crassostrea virginica|GBMLB3952-09|United States|BOLD:AAA3345|FJ693052  
Crassostrea virginica|GBMLB3955-09|United States|BOLD:AAA3345|FJ693049  
Crassostrea virginica|GBMLB3936-09|United States|BOLD:AAA3345|FJ693068  
Crassostrea virginica|GBMLB3907-09|United States|BOLD:AAA3345|FJ693097  
Crassostrea virginica|ECMOL330-11|Canada|BOLD:AAA3345|KF643482  
Crassostrea virginica|ECMOL331-11|Canada|BOLD:AAA3345|KF643598  
Crassostrea virginica|GBMLB3918-09|United States|BOLD:AAA3345|FJ693086  
Crassostrea virginica|GBMLB3945-09|United States|BOLD:AAA3345|FJ693059  
Crassostrea virginica|GBMLB3953-09|United States|BOLD:AAA3345|FJ693051  
Crassostrea virginica|GBMLB3927-09|United States|BOLD:AAA3345|FJ693077  
Crassostrea virginica|GBMLB3973-09|United States|BOLD:AAA3345|FJ693029  
Crassostrea virginica|GBMLB3954-09|United States|BOLD:AAA3345|FJ693050  
Crassostrea virginica|GBMLB3986-09|United States|BOLD:AAA3345|FJ693016  
Crassostrea virginica|GBMLB3983-09|United States|BOLD:AAA3345|FJ693019  
Crassostrea virginica|GBMLB4553-09||BOLD:AAA3345|FJ973635  
Crassostrea virginica|GBMLB3962-09|United States|BOLD:AAA3345|FJ693042  
Crassostrea virginica|GBMLB3916-09|United States|BOLD:AAA3345|FJ693088  
Crassostrea virginica|GBMLB3984-09|United States|BOLD:AAA3345|FJ693018  
Crassostrea virginica|GBMLB3982-09|United States|BOLD:AAA3345|FJ693020  
Crassostrea virginica|GBMLB3909-09|United States|BOLD:AAA3345|FJ693095  
Crassostrea virginica|ECMOL334-11|Canada|BOLD:AAA3345|KF643557  
Crassostrea virginica|GBMLB3935-09|United States|BOLD:AAA3345|FJ693069  
Crassostrea virginica|GBMLB5202-13||BOLD:AAA3345|JX468940  
Crassostrea virginica|GBMLB5209-13||BOLD:AAA3345|JX468933  
Crassostrea virginica|GBMLB3934-09|United States|BOLD:AAA3345|FJ693070  
Crassostrea virginica|GBMLB3912-09|United States|BOLD:AAA3345|FJ693092  
Crassostrea virginica|GBMLB5238-13||BOLD:AAA3345|JX468904  
Crassostrea virginica|GBMLB3943-09|United States|BOLD:AAA3345|FJ693061  
Crassostrea virginica|GBMLB3940-09|United States|BOLD:AAA3345|FJ693064  
Crassostrea virginica|GBMLB3988-09|United States|BOLD:AAA3345|FJ693014  
Crassostrea virginica|GBMLB3913-09|United States|BOLD:AAA3345|FJ693091  
Crassostrea virginica|GBMLB5243-13||BOLD:AAA3345|JX468899  
Crassostrea virginica|GBMLB3944-09|United States|BOLD:AAA3345|FJ693060  
Crassostrea virginica|GBMLB3941-09|United States|BOLD:AAA3345|FJ693063  
Crassostrea virginica|GBMLB3939-09|United States|BOLD:AAA3345|FJ693065  
Crassostrea virginica|GBMLB3933-09|United States|BOLD:AAA3345|FJ693071  
Crassostrea virginica|GBMLB3977-09|United States|BOLD:AAA3345|FJ693025  
Crassostrea virginica|GBMLB4522-09||BOLD:AAA3345|FJ973666  
Crassostrea virginica|GBMLB5242-13||BOLD:AAA3345|JX468900  
Crassostrea virginica|GBMLB5239-13||BOLD:AAA3345|JX468903  
Crassostrea virginica|GBMLB5211-13||BOLD:AAA3345|JX468931  
Crassostrea virginica|GBMLB5208-13||BOLD:AAA3345|JX468934  
Crassostrea virginica|GBMLB5207-13||BOLD:AAA3345|JX468935  
Crassostrea virginica|GBMLB5205-13||BOLD:AAA3345|JX468937  
Crassostrea virginica|GBMLB5203-13||BOLD:AAA3345|JX468939  
Crassostrea virginica|GBMLB3942-09|United States|BOLD:AAA3345|FJ693062  
Crassostrea virginica|GBMLB5694-14|United States|BOLD:AAA3345|KF245599  
Crassostrea virginica|GBMLB6113-14||BOLD:AAA3345|FJ717609  
Crassostrea virginica|GBMLB5199-13||BOLD:AAA3345|JX468943  
Crassostrea virginica|GBMLB5206-13||BOLD:AAA3345|JX468936  
Crassostrea virginica|GBMLB5198-13||BOLD:AAA3345|JX468944  
Crassostrea virginica|GBMLB6114-14||BOLD:AAA3345|FJ717610  
Crassostrea virginica|GBMTG650-16||BOLD:AAA3345|NC\_007175  
Crassostrea virginica|GBML5089-19||BOLD:AAA3345|AY905542  
Crassostrea virginica|ECMOL332-11|Canada|BOLD:AAA3345|KF644075  
Crassostrea virginica|ECMOL309-11|Canada|BOLD:AAA3345|KF644230  
Crassostrea virginica|GBMLB3947-09|United States|BOLD:AAA3345|FJ693057  
Crassostrea virginica|GBMLB3957-09|United States|BOLD:AAA3345|FJ693047  
Crassostrea virginica|GBMLB4540-09||BOLD:AAA3345|FJ973648  
Crassostrea virginica|GBMLB3914-09|United States|BOLD:AAA3345|FJ693090  
Crassostrea virginica|GBMLB4543-09||BOLD:AAA3345|FJ973645  
Crassostrea virginica|GBMLB3979-09|United States|BOLD:AAA3345|FJ693023  
Crassostrea virginica|ECMOL333-11|Canada|BOLD:AAA3345|KF643392  
Crassostrea virginica|GBMLB4539-09||BOLD:AAA3345|FJ973649  
Crassostrea virginica|GBMLB4537-09||BOLD:AAA3345|FJ973651  
Crassostrea virginica|GBMLB5228-13||BOLD:AAA3345|JX468914  
Crassostrea virginica|GBMLB3910-09|United States|BOLD:AAA3345|FJ693094  
Crassostrea virginica|GBMLB4520-09||BOLD:AAA3345|FJ973668

Crassostrea virginica|GBMLB5228-13||BOLD:AAA3345|JX468914  
Crassostrea virginica|GBMLB3910-09|United States|BOLD:AAA3345|FJ693094  
Crassostrea virginica|GBMLB4520-09||BOLD:AAA3345|FJ973668  
Crassostrea virginica|GBMLB3937-09|United States|BOLD:AAA3345|FJ693067  
Crassostrea virginica|GBMLB5214-13||BOLD:AAA3345|JX468928  
Crassostrea virginica|GBMLB5215-13||BOLD:AAA3345|JX468927  
Crassostrea virginica|GBMLB5217-13||BOLD:AAA3345|JX468925  
Crassostrea virginica|GBMLB5219-13||BOLD:AAA3345|JX468923  
Crassostrea virginica|GBMLB5221-13||BOLD:AAA3345|JX468921  
Crassostrea virginica|GBMLB5222-13||BOLD:AAA3345|JX468920  
Crassostrea virginica|GBMLB5223-13||BOLD:AAA3345|JX468919  
Crassostrea virginica|GBMLB5224-13||BOLD:AAA3345|JX468918  
Crassostrea virginica|GBMLB5212-13||BOLD:AAA3345|JX468930  
Crassostrea virginica|GBMLB5213-13||BOLD:AAA3345|JX468929  
Crassostrea virginica|GBMLB5225-13||BOLD:AAA3345|JX468917  
Crassostrea virginica|ECMOL348-11|Canada|BOLD:AAA3345|KF644147  
Crassostrea virginica|GBMLB5695-14|United States|BOLD:AAA3345|KF245600  
Crassostrea virginica|GBMLB5235-13||BOLD:AAA3345|JX468907  
Crassostrea virginica|GBMLB5236-13||BOLD:AAA3345|JX468906  
Crassostrea virginica|GBMLB5229-13||BOLD:AAA3345|JX468913  
Crassostrea virginica|GBMLB5230-13||BOLD:AAA3345|JX468912  
Crassostrea virginica|GBMLB5233-13||BOLD:AAA3345|JX468909  
Crassostrea virginica|GBMLB5234-13||BOLD:AAA3345|JX468908  
Crassostrea virginica|GBMLB5226-13||BOLD:AAA3345|JX468916  
Crassostrea virginica|GBMLB5227-13||BOLD:AAA3345|JX468915  
Crassostrea virginica|GBMLB5237-13||BOLD:AAA3345|JX468905  
Crassostrea virginica|GBMLB5245-13||BOLD:AAA3345|JX468897  
Crassostrea virginica|GBMLB5231-13||BOLD:AAA3345|JX468911  
Crassostrea virginica|GBMLB5232-13||BOLD:AAA3345|JX468910  
Crassostrea virginica|GBMLB5246-13||BOLD:AAA3345|JX468896  
Crassostrea virginica|GBMLB5220-13||BOLD:AAA3345|JX468922  
Crassostrea virginica|GBMLB5218-13||BOLD:AAA3345|JX468924  
Crassostrea virginica|GBMLB5216-13||BOLD:AAA3345|JX468926  
Crassostrea virginica|GBMLB5210-13||BOLD:AAA3345|JX468932  
Crassostrea virginica|GBMLB5204-13||BOLD:AAA3345|JX468938  
Crassostrea virginica|GBMLB5201-13||BOLD:AAA3345|JX468941  
Crassostrea virginica|GBMLB5200-13||BOLD:AAA3345|JX468942  
Crassostrea virginica|SERC1558-14|United States|BOLD:AAA3345|KU905769  
Crassostrea virginica|GBMLB5244-13||BOLD:AAA3345|JX468898  
Crassostrea virginica|GBMLB5888-14|United States|BOLD:AAA3345|FJ743529  
Crassostrea virginica|OZIMP088-16|United States|BOLD:AAA3345  
Crassostrea virginica|OZIMP029-15|United States|BOLD:AAA3345  
Crassostrea virginica|GBMLB5696-14|United States|BOLD:AAA3345|KF245601  
Crassostrea virginica|GBMLB4527-09||BOLD:AAA3345|FJ973661  
Crassostrea virginica|SERC1559-14|United States|BOLD:AAA3345|KU905908  
Crassostrea virginica|SERC1557-14|United States|BOLD:AAA3345|KU905937  
Crassostrea virginica|ECMOL347-11|Canada|BOLD:AAA3345|KF644145  
Crassostrea virginica|GBMLB3911-09|United States|BOLD:AAA3345|FJ693093  
Crassostrea virginica|GBMLB4524-09||BOLD:AAA3345|FJ973664  
Crassostrea virginica|GBML5088-19||BOLD:AAA3345|FJ973670  
Crassostrea virginica|GBML5090-19||BOLD:AAA3345|MH012230  
Crassostrea virginica|GBMNB72894-20|Cuba|BOLD:ACV8440|MN817956  
Crassostrea virginica|GBMNB72893-20|Cuba|BOLD:ACV8440|MN817955  
Crassostrea virginica|GBMNB72895-20|Cuba|BOLD:ACV8440|MN817957  
Crassostrea virginica|GBMNB72898-20|Cuba|BOLD:ACV8440|MN817960  
Crassostrea virginica|GBMNB72897-20|Cuba|BOLD:ACV8440|MN817959  
Crassostrea virginica|GBMLB6490-15||BOLD:ACV8440|KP455023  
Crassostrea virginica|GBMLB6489-15||BOLD:ACV8440|KP455015  
Crassostrea virginica|GBMLB6491-15||BOLD:ACV8440|KP455024  
Crassostrea virginica|GBMLB6492-15||BOLD:ACV8440|KP455029  
Crassostrea virginica|GBMNB72887-20|Cuba|BOLD:ACV8440|MN817949  
Crassostrea virginica|GBMNB72888-20|Cuba|BOLD:ACV8440|MN817950  
Crassostrea virginica|GBMNB72886-20|Cuba|BOLD:ACV8440|MN817948  
Crassostrea virginica|GBMNB72890-20|Cuba|BOLD:ACV8440|MN817952  
Crassostrea virginica|GBMNB72891-20|Cuba|BOLD:ACV8440|MN817953  
Crassostrea virginica|GBMNB72896-20|Cuba|BOLD:ACV8440|MN817958  
Crassostrea virginica|GBMNB72899-20|Cuba|BOLD:ACV8440|MN817961  
Crassostrea virginica|GBMNB72900-20|Cuba|BOLD:ACV8440|MN817962  
Crassostrea virginica|GBMNB72901-20|Cuba|BOLD:ACV8440|MN817963  
Crassostrea virginica|GBMNB72902-20|Cuba|BOLD:ACV8440|MN817964  
Crassostrea virginica|GBMNB72903-20|Cuba|BOLD:ACV8440|MN817965  
Crassostrea virginica|GBMNB72904-20|Cuba|BOLD:ACV8440|MN817966  
Spondylus nicobaricus|GBMLB0021-06||BOLD:AAJ3426|AB033685  
Spondylus nicobaricus|KANBI591-19|United States|BOLD:ADW6324  
Spondylus nicobaricus|GBMND9224-21|United States|BOLD:ADW6324|MW278132  
Carcinus maenas|GBCMD29168-19|United Kingdom|BOLD:AAA7687|MH931378  
Carcinus maenas|GBCMD4090-17|United States|BOLD:AAA7687|KY801064  
Carcinus maenas|GBCMD29167-19|United Kingdom|BOLD:AAA7687|MH931377  
Carcinus maenas|PBCB038-17|United States|BOLD:AAA7687  
Carcinus maenas|GBCMD25921-19|United States|BOLD:AAA7687|KY801074  
Carcinus maenas|GBCMD3835-17|United States|BOLD:AAA7687|KY801173  
Carcinus maenas|GBCMD2914-09||BOLD:AAA7687|FJ159028  
Carcinus maenas|GBCMD17572-19|Canada|BOLD:AAA7687|HQ129977  
Carcinus maenas|GBCMD17571-19|Canada|BOLD:AAA7687|HQ129976  
Carcinus maenas|GBCMD17569-19|Canada|BOLD:AAA7687|HQ129974  
Carcinus maenas|GBCMD17568-19|Canada|BOLD:AAA7687|HQ129973  
Carcinus maenas|GBCMD17566-19|Canada|BOLD:AAA7687|HQ129971  
Carcinus maenas|GBCMD17565-19|Canada|BOLD:AAA7687|HQ129970  
Carcinus maenas|GBCMD17564-19|Canada|BOLD:AAA7687|HQ129969  
Carcinus maenas|GBCMD17562-19|Canada|BOLD:AAA7687|HQ129967  
Carcinus maenas|GBCMD17559-19|Canada|BOLD:AAA7687|HQ129964  
Carcinus maenas|GBCMD17558-19|Canada|BOLD:AAA7687|HQ129963  
Carcinus maenas|GBCMD17556-19|Canada|BOLD:AAA7687|HQ129961  
Carcinus maenas|GBCMD17552-19|Canada|BOLD:AAA7687|HQ129957  
Carcinus maenas|GBCMD17551-19|Canada|BOLD:AAA7687|HQ129956  
Carcinus maenas|GBCMD17550-19|Canada|BOLD:AAA7687|HQ129955  
Carcinus maenas|GBCMD17548-19|Canada|BOLD:AAA7687|HQ129953  
Carcinus maenas|GBCMD17547-19|Canada|BOLD:AAA7687|HQ129952  
Carcinus maenas|GBCMD17546-19|Canada|BOLD:AAA7687|HQ129951  
Carcinus maenas|GBCMD17543-19|Canada|BOLD:AAA7687|HQ129948  
Carcinus maenas|GBCMD17534-19|Canada|BOLD:AAA7687|HQ129939  
Carcinus maenas|GBCMD17531-19|Canada|BOLD:AAA7687|HQ129936



Carcinus maenas|GBCM23686-19|Canada|BOLD:AAA7687|MK634800  
Carcinus maenas|GBCM23686-19|Canada|BOLD:AAA7687|MK634805  
Carcinus maenas|GBCM23685-19|Canada|BOLD:AAA7687|MK634804  
Carcinus maenas|GBCM23682-19|Canada|BOLD:AAA7687|MK634801  
Carcinus maenas|GBCM23681-19|Canada|BOLD:AAA7687|MK634800  
Carcinus maenas|GBCM23680-19|Canada|BOLD:AAA7687|MK634799  
Carcinus maenas|GBCM23679-19|Canada|BOLD:AAA7687|MK634798  
Carcinus maenas|GBCM23678-19|Canada|BOLD:AAA7687|MK634797  
Carcinus maenas|GBCM23675-19|Canada|BOLD:AAA7687|MK634794  
Carcinus maenas|GBCM23674-19|Canada|BOLD:AAA7687|MK634793  
Carcinus maenas|GBCM23673-19|Canada|BOLD:AAA7687|MK634792  
Carcinus maenas|GBCM23671-19|Canada|BOLD:AAA7687|MK634790  
Carcinus maenas|GBCM23670-19|Canada|BOLD:AAA7687|MK634789  
Carcinus maenas|GBCM23668-19|Canada|BOLD:AAA7687|MK634787  
Carcinus maenas|GBCM23667-19|Canada|BOLD:AAA7687|MK634786  
Carcinus maenas|GBCM23666-19|Canada|BOLD:AAA7687|MK634785  
Carcinus maenas|GBCM23665-19|Canada|BOLD:AAA7687|MK634784  
Carcinus maenas|GBCM23663-19|Canada|BOLD:AAA7687|MK634782  
Carcinus maenas|GBCM23662-19|Canada|BOLD:AAA7687|MK634781  
Carcinus maenas|GBCM23661-19|Canada|BOLD:AAA7687|MK634780  
Carcinus maenas|GBCM23659-19|Canada|BOLD:AAA7687|MK634778  
Carcinus maenas|GBCM23657-19|Canada|BOLD:AAA7687|MK634776  
Carcinus maenas|GBCM23656-19|Canada|BOLD:AAA7687|MK634775  
Carcinus maenas|GBCM23655-19|Canada|BOLD:AAA7687|MK634774  
Carcinus maenas|GBCM23652-19|Canada|BOLD:AAA7687|MK634771  
Carcinus maenas|GBCM23651-19|Canada|BOLD:AAA7687|MK634770  
Carcinus maenas|GBCM23650-19|Canada|BOLD:AAA7687|MK634769  
Carcinus maenas|GBCM23649-19|Canada|BOLD:AAA7687|MK634768  
Carcinus maenas|GBCM23648-19|Canada|BOLD:AAA7687|MK634767  
Carcinus maenas|GBCM23646-19|Canada|BOLD:AAA7687|MK634765  
Carcinus maenas|GBCM23645-19|Canada|BOLD:AAA7687|MK634764  
Carcinus maenas|GBCM23643-19|Canada|BOLD:AAA7687|MK634762  
Carcinus maenas|GBCM23641-19|Canada|BOLD:AAA7687|MK634760  
Carcinus maenas|GBCM23640-19|Canada|BOLD:AAA7687|MK634759  
Carcinus maenas|GBCM23639-19|Canada|BOLD:AAA7687|MK634758  
Carcinus maenas|GBCM23638-19|Canada|BOLD:AAA7687|MK634757  
Carcinus maenas|GBMND85373-21|BOLD:AAA7687|MT547801  
Carcinus maenas|GBMND85371-21|BOLD:AAA7687|MT547799  
Carcinus maenas|GBCM23636-19|Canada|BOLD:AAA7687|MK634755  
Carcinus maenas|GBCM23635-19|Canada|BOLD:AAA7687|MK634754  
Carcinus maenas|GBCM23634-19|Canada|BOLD:AAA7687|MK634753  
Carcinus maenas|GBCM23633-19|Canada|BOLD:AAA7687|MK634752  
Carcinus maenas|GBCM23632-19|Canada|BOLD:AAA7687|MK634751  
Carcinus maenas|GBCMD2882-09|BOLD:AAA7687|FJ159060  
Carcinus maenas|GBCMD2873-09|BOLD:AAA7687|FJ159069  
Carcinus maenas|SDP572009-16|United States|BOLD:AAA7687|KX781830  
Carcinus maenas|GBCMD2902-09|BOLD:AAA7687|FJ159040  
Carcinus maenas|GBCMD2897-09|BOLD:AAA7687|FJ159045  
Carcinus maenas|GBCMD19665-19|BOLD:AAA7687|KF709201  
Carcinus maenas|JSDN002-08|Norway|BOLD:AAA7687|JQ305943  
Carcinus maenas|GBCMD2864-09|BOLD:AAA7687|FJ159078  
Carcinus maenas|GBCM5748-17|BOLD:AAA7687|KT952477  
Carcinus maenas|GBCM6515-17|BOLD:AAA7687|KT952474  
Carcinus maenas|GBCMD17573-19|United States|BOLD:AAA7687|EU329154  
Carcinus maenas|GBCMD19666-19|BOLD:AAA7687|KF709202  
Carcinus maenas|DAR234-07|Australia|BOLD:AAA7687  
Carcinus maenas|JSDUK016-08|United Kingdom|BOLD:AAA7687|JQ306002  
Carcinus maenas|FCCOM245-11|Portugal|BOLD:AAA7687  
Carcinus maenas|BNSDE350-14|North Sea|BOLD:AAA7687|KT208765  
Carcinus maenas|GBCMD0392-06|Germany|BOLD:AAA7687|AY616443  
Carcinus maenas|GBCMD2916-09|BOLD:AAA7687|FJ159026  
Carcinus maenas|GBMND85361-21|BOLD:AAA7687|MT547789  
Carcinus maenas|GBMND85355-21|BOLD:AAA7687|MT547783  
Carcinus maenas|GBCMD25944-19|United States|BOLD:AAA7687|KY801174  
Carcinus maenas|GBCMD25943-19|United States|BOLD:AAA7687|KY801171  
Carcinus maenas|GBCMD25942-19|United States|BOLD:AAA7687|KY801169  
Carcinus maenas|GBCMD25941-19|United States|BOLD:AAA7687|KY801160  
Carcinus maenas|GBCMD25940-19|United States|BOLD:AAA7687|KY801157  
Carcinus maenas|GBCMD25924-19|Canada|BOLD:AAA7687|KY801086  
Carcinus maenas|GBCMD25920-19|United States|BOLD:AAA7687|KY801069  
Carcinus maenas|GBCMD25919-19|United States|BOLD:AAA7687|KY801068  
Carcinus maenas|GBCMD25917-19|United States|BOLD:AAA7687|KY801066  
Carcinus maenas|GBCMD25916-19|United States|BOLD:AAA7687|KY801063  
Carcinus maenas|GBCMD25915-19|United States|BOLD:AAA7687|KY801056  
Carcinus maenas|GBCMD25914-19|United States|BOLD:AAA7687|KY801054  
Carcinus maenas|GBCMD25902-19|Canada|BOLD:AAA7687|KY801008  
Carcinus maenas|GBCMD25901-19|Canada|BOLD:AAA7687|KY801007  
Carcinus maenas|GBCMD25897-19|Canada|BOLD:AAA7687|KY800980  
Carcinus maenas|GBCMD25895-19|Canada|BOLD:AAA7687|KY800964  
Carcinus maenas|GBCMD25894-19|Canada|BOLD:AAA7687|KY800961  
Carcinus maenas|GBCM4815-17|Canada|BOLD:AAA7687|KY800931  
Carcinus maenas|GBCM4809-17|Canada|BOLD:AAA7687|KY800916  
Carcinus maenas|GBCM4795-17|Canada|BOLD:AAA7687|KY801099  
Carcinus maenas|GBCM4794-17|Canada|BOLD:AAA7687|KY801097  
Carcinus maenas|GBCM4789-17|Canada|BOLD:AAA7687|KY801100  
Carcinus maenas|GBCM4787-17|Canada|BOLD:AAA7687|KY801087  
Carcinus maenas|GBCM4781-17|Canada|BOLD:AAA7687|KY801076  
Carcinus maenas|GBCM4776-17|Canada|BOLD:AAA7687|KY801080  
Carcinus maenas|GBCM4775-17|Canada|BOLD:AAA7687|KY801081  
Carcinus maenas|GBCM4770-17|Canada|BOLD:AAA7687|KY801079  
Carcinus maenas|GBCM4769-17|Canada|BOLD:AAA7687|KY801078  
Carcinus maenas|GBCM4641-17|Canada|BOLD:AAA7687|KY801033  
Carcinus maenas|GBCM4464-17|Canada|BOLD:AAA7687|KY800970  
Carcinus maenas|GBCM4463-17|Canada|BOLD:AAA7687|KY800965  
Carcinus maenas|GBCM4461-17|Canada|BOLD:AAA7687|KY800979  
Carcinus maenas|GBCM4460-17|Canada|BOLD:AAA7687|KY800976  
Carcinus maenas|GBCM4459-17|Canada|BOLD:AAA7687|KY800981  
Carcinus maenas|GBCM4458-17|Canada|BOLD:AAA7687|KY800978  
Carcinus maenas|GBCM4456-17|Canada|BOLD:AAA7687|KY800971  
Carcinus maenas|GBCM4455-17|Canada|BOLD:AAA7687|KY800969  
Carcinus maenas|GBCM4453-17|Canada|BOLD:AAA7687|KY800959  
Carcinus maenas|GBCM4452-17|Canada|BOLD:AAA7687|KY800966

Carcinus maenas|GBCM4455-17|Canada|BOLD:AAA7687|KY800969  
Carcinus maenas|GBCM4453-17|Canada|BOLD:AAA7687|KY800959  
Carcinus maenas|GBCM4452-17|Canada|BOLD:AAA7687|KY800966  
Carcinus maenas|GBCM4451-17|Canada|BOLD:AAA7687|KY800963  
Carcinus maenas|GBCM4450-17|Canada|BOLD:AAA7687|KY800960  
Carcinus maenas|GBCM4449-17|Canada|BOLD:AAA7687|KY800968  
Carcinus maenas|GBCM4447-17|Canada|BOLD:AAA7687|KY800977  
Carcinus maenas|GBCM4446-17|Canada|BOLD:AAA7687|KY800962  
Carcinus maenas|GBCM4249-17|Canada|BOLD:AAA7687|KY801013  
Carcinus maenas|GBCM4242-17|Canada|BOLD:AAA7687|KY801022  
Carcinus maenas|GBCM4240-17|Canada|BOLD:AAA7687|KY801016  
Carcinus maenas|GBCM4097-17|United States|BOLD:AAA7687|KY801053  
Carcinus maenas|GBCM4096-17|United States|BOLD:AAA7687|KY801060  
Carcinus maenas|GBCM4095-17|United States|BOLD:AAA7687|KY801071  
Carcinus maenas|GBCM4094-17|United States|BOLD:AAA7687|KY801072  
Carcinus maenas|GBCM4092-17|United States|BOLD:AAA7687|KY801059  
Carcinus maenas|GBCM4091-17|United States|BOLD:AAA7687|KY801073  
Carcinus maenas|GBCM4089-17|United States|BOLD:AAA7687|KY801062  
Carcinus maenas|GBCM4088-17|United States|BOLD:AAA7687|KY801055  
Carcinus maenas|GBCM7922-17|BOLD:AAA7687|KT952478  
Carcinus maenas|PBCB035-17|United States|BOLD:AAA7687  
Carcinus maenas|BNSDE359-14|North Sea|BOLD:AAA7687|KT209504  
Carcinus maenas|BNSDE363-14|North Sea|BOLD:AAA7687|KT209356  
Carcinus maenas|SWEMA618-15|Sweden|BOLD:AAA7687|MG935203  
Carcinus maenas|BNSDE293-13|North Sea|BOLD:AAA7687|KT208816  
Carcinus maenas|CAISN879-13|Canada|BOLD:AAA7687  
Carcinus maenas|CAISN877-13|Canada|BOLD:AAA7687  
Carcinus maenas|COAPP162-12|Canada|BOLD:AAA7687|MG936474  
Carcinus maenas|CAISN876-13|Canada|BOLD:AAA7687  
Carcinus maenas|DAR173-06|Australia|BOLD:AAA7687  
Carcinus maenas|CAISN878-13|Canada|BOLD:AAA7687  
Carcinus maenas|MLALE066-12|Portugal|BOLD:AAA7687|KF369118  
Carcinus maenas|OZIMP055-15|Australia|BOLD:AAA7687  
Carcinus maenas|DAR175-06|Australia|BOLD:AAA7687  
Carcinus maenas|DAR174-06|Australia|BOLD:AAA7687  
Carcinus maenas|DAR172-06|Australia|BOLD:AAA7687  
Carcinus maenas|GBCMD2884-09|BOLD:AAA7687|FJ159058  
Carcinus maenas|GBCMD19667-19|BOLD:AAA7687|KF709203  
Carcinus maenas|SWEMA619-15|Sweden|BOLD:AAA7687|MG935091  
Carcinus maenas|BNSDE351-14|North Sea|BOLD:AAA7687|KT209289  
Carcinus maenas|GBCMD0870-06|United States|BOLD:AAA7687|DQ523683  
Carcinus maenas|GBCMD2932-09|BOLD:AAA7687|FJ159010  
Carcinus maenas|GBMND85356-21|BOLD:AAA7687|MT547784  
Carcinus maenas|GBCM4087-17|United States|BOLD:AAA7687|KY801070  
Carcinus maenas|GBCM4086-17|United States|BOLD:AAA7687|KY801058  
Carcinus maenas|GBCM4085-17|United States|BOLD:AAA7687|KY801061  
Carcinus maenas|GBCM4084-17|United States|BOLD:AAA7687|KY801057  
Carcinus maenas|GBCM4083-17|United States|BOLD:AAA7687|KY801075  
Carcinus maenas|GBCM3838-17|United States|BOLD:AAA7687|KY801162  
Carcinus maenas|GBCM3832-17|United States|BOLD:AAA7687|KY801156  
Carcinus maenas|GBCM3829-17|United States|BOLD:AAA7687|KY801168  
Carcinus maenas|GBCMD2934-09|BOLD:AAA7687|FJ159008  
Carcinus maenas|BNSDE349-14|North Sea|BOLD:AAA7687|KT209466  
Carcinus maenas|GBCMD29169-19|United Kingdom|BOLD:AAA7687|MH931387  
Carcinus maenas|GBMND85381-21|BOLD:AAA7687|MT547809  
Carcinus maenas|GBCM3839-17|United States|BOLD:AAA7687|KY801172  
Carcinus maenas|GBCM3837-17|United States|BOLD:AAA7687|KY801167  
Carcinus maenas|GBCM3831-17|United States|BOLD:AAA7687|KY801170  
Carcinus maenas|GBCM3826-17|United States|BOLD:AAA7687|KY801161  
Carcinus maenas|GBCMD2863-09|BOLD:AAA7687|FJ159079  
Carcinus maenas|GBCMD2887-09|BOLD:AAA7687|FJ159055  
Carcinus maenas|GBCM10844-17|BOLD:AAA7687|KT952475  
Carcinus maenas|SDP396002-15|United States|BOLD:AAA7687|KU564520  
Carcinus maenas|SDP396001-15|United States|BOLD:AAA7687|KU564519  
Carcinus maenas|SDP547023-16|United States|BOLD:AAA7687|KY250730  
Carcinus maenas|SDP696001-18|United States|BOLD:AAA7687|MK091907  
Carcinus maenas|SDP696002-18|United States|BOLD:AAA7687|MK091908  
Carcinus maenas|SDP696011-18|United States|BOLD:AAA7687|MK091911  
Carcinus maenas|GBCM3836-17|United States|BOLD:AAA7687|KY801163  
Carcinus maenas|GBCM3830-17|United States|BOLD:AAA7687|KY801166  
Carcinus maenas|GBCM3827-17|United States|BOLD:AAA7687|KY801164  
Carcinus maenas|GBCM23631-19|Canada|BOLD:AAA7687|MK634750  
Carcinus maenas|GBCM23630-19|Canada|BOLD:AAA7687|MK634749  
Carcinus maenas|GBCM23629-19|Canada|BOLD:AAA7687|MK634748  
Carcinus maenas|JSDUK019-08|United Kingdom|BOLD:AAA7687|JQ306003  
Carcinus maenas|GBCMD2904-09|BOLD:AAA7687|FJ159038  
Carcinus maenas|GBCM3833-17|United States|BOLD:AAA7687|KY801158  
Carcinus maenas|GBCM23769-19|United States|BOLD:AAA7687|MK634888  
Carcinus maenas|GBCM23773-19|United States|BOLD:AAA7687|MK634892  
Carcinus maenas|GBCM23761-19|United States|BOLD:AAA7687|MK634880  
Carcinus maenas|GBCM23759-19|United States|BOLD:AAA7687|MK634878  
Carcinus maenas|GBCM23718-19|United States|BOLD:AAA7687|MK634837  
Carcinus maenas|GBCM23658-19|Canada|BOLD:AAA7687|MK634777  
Carcinus maenas|GBCM3840-17|United States|BOLD:AAA7687|KY801165  
Carcinus maenas|GBCMD2933-09|BOLD:AAA7687|FJ159009  
Carcinus maenas|GBCMD2923-09|BOLD:AAA7687|FJ159019  
Carcinus maenas|GBCMD0869-06|United States|BOLD:AAA7687|DQ523682  
Carcinus maenas|GBCM4093-17|United States|BOLD:AAA7687|KY801065  
Carcinus maenas|GBCM4457-17|Canada|BOLD:AAA7687|KY800972  
Carcinus maenas|GBCM4785-17|Canada|BOLD:AAA7687|KY801085  
Carcinus maenas|GBCM4788-17|Canada|BOLD:AAA7687|KY801092  
Carcinus maenas|GBCMD25918-19|United States|BOLD:AAA7687|KY801067  
Carcinus maenas|GBMND85376-21|BOLD:AAA7687|MT547804  
Carcinus maenas|GBCM23777-19|United States|BOLD:AAA7687|MK634896  
Carcinus maenas|GBMND85377-21|BOLD:AAA7687|MT547805  
Carcinus maenas|GBMND85378-21|BOLD:AAA7687|MT547806  
Carcinus maenas|GBCM3828-17|United States|BOLD:AAA7687|KY801159  
Carcinus maenas|GBCM4454-17|Canada|BOLD:AAA7687|KY800974  
Carcinus maenas|GBCMD25896-19|Canada|BOLD:AAA7687|KY800975  
Carcinus maenas|GBCMD2886-09|BOLD:AAA7687|FJ159056  
Carcinus maenas|NBCRU002-12|Canada|BOLD:AAA7687|MG936023  
Carcinus maenas|W630-08|Canada|BOLD:AAA7687



Carcinus maenas|GBCMD2886-09||BOLD:AAA7687|FJ159056  
Carcinus maenas|NBCRU002-12|Canada|BOLD:AAA7687|MG936023  
Carcinus maenas|WW630-08|Canada|BOLD:AAA7687  
Carcinus maenas|WW633-08|Canada|BOLD:AAA7687  
Carcinus|NIB121-21|Ireland|BOLD:AAA7687  
Carcinus maenas|GBCMD2867-09||BOLD:AAA7687|FJ159075  
Carcinus maenas|GBCMD2874-09||BOLD:AAA7687|FJ159068  
Carcinus maenas|GBMND85368-21||BOLD:AAA7687|MT547796  
Carcinus maenas|GBCMD2875-09||BOLD:AAA7687|FJ159067  
Carcinus maenas|GBCMD2878-09||BOLD:AAA7687|FJ159064  
Carcinus maenas|GBCMD2918-09||BOLD:AAA7687|FJ159024  
Carcinus maenas|FCCOM246-11|Portugal|BOLD:AAA7687  
Carcinus maenas|GBMND85384-21||BOLD:AAA7687|MT547812  
Carcinus maenas|GBCMD2870-09||BOLD:AAA7687|FJ159072  
Carcinus maenas|GBCMD2876-09||BOLD:AAA7687|FJ159066  
Carcinus maenas|GBCMD2879-09||BOLD:AAA7687|FJ159063  
Carcinus maenas|GBMND85370-21||BOLD:AAA7687|MT547798  
Carcinus maenas|GBCMD2865-09||BOLD:AAA7687|FJ159077  
Carcinus maenas|GBMNC67160-20|Spain|BOLD:AAA7687|MN185340  
Carcinus maenas|GBCMD2910-09||BOLD:AAA7687|FJ159032  
Carcinus maenas|GBCMD2871-09||BOLD:AAA7687|FJ159071  
Carcinus maenas|GBCMD2898-09||BOLD:AAA7687|FJ159044  
Carcinus maenas|GBCMD2922-09||BOLD:AAA7687|FJ159020  
Carcinus maenas|GBCMD19668-19||BOLD:AAA7687|KF709204  
Carcinus maenas|GBMND85364-21||BOLD:AAA7687|MT547792  
Carcinus maenas|GBCMD2906-09||BOLD:AAA7687|FJ159036  
Carcinus maenas|GBMND85362-21||BOLD:AAA7687|MT547790  
Carcinus maenas|GBMND85372-21||BOLD:AAA7687|MT547800  
Carcinus maenas|GBCMD2903-09||BOLD:AAA7687|FJ159039  
Carcinus maenas|GBCMD2920-09||BOLD:AAA7687|FJ159022  
Carcinus maenas|BNSDE361-14|North Sea|BOLD:AAA7687|KT208491  
Carcinus maenas|WWGSL137-08|Canada|BOLD:AAA7687|FJ581593  
Carcinus maenas|WWGSL335-08|Canada|BOLD:AAA7687|FJ581592  
Carcinus maenas|WW665-08|Canada|BOLD:AAA7687|FJ581597  
Carcinus maenas|WW667-08|Canada|BOLD:AAA7687  
Carcinus maenas|WW664-08|Canada|BOLD:AAA7687|FJ581594  
Carcinus maenas|WW661-08|Canada|BOLD:AAA7687|FJ581595  
Carcinus maenas|WW632-08|Canada|BOLD:AAA7687  
Carcinus maenas|GBCM23849-19|Canada|BOLD:AAA7687|MK634968  
Carcinus maenas|GBCM23842-19|Canada|BOLD:AAA7687|MK634961  
Carcinus maenas|GBCM23833-19|Canada|BOLD:AAA7687|MK634952  
Carcinus maenas|GBCM23825-19|Canada|BOLD:AAA7687|MK634944  
Carcinus maenas|GBCM23823-19|Canada|BOLD:AAA7687|MK634942  
Carcinus maenas|GBCM23819-19|Canada|BOLD:AAA7687|MK634938  
Carcinus maenas|GBCM23813-19|Canada|BOLD:AAA7687|MK634932  
Carcinus maenas|GBCM23809-19|Canada|BOLD:AAA7687|MK634928  
Carcinus maenas|GBCM23801-19|Canada|BOLD:AAA7687|MK634920  
Carcinus maenas|GBCM23800-19|Canada|BOLD:AAA7687|MK634919  
Carcinus maenas|GBCM23796-19|Canada|BOLD:AAA7687|MK634915  
Carcinus maenas|GBCM23794-19|Canada|BOLD:AAA7687|MK634913  
Carcinus maenas|GBCM23788-19|Canada|BOLD:AAA7687|MK634907  
Carcinus maenas|GBCM23782-19|Canada|BOLD:AAA7687|MK634901  
Carcinus maenas|GBCM23781-19|Canada|BOLD:AAA7687|MK634900  
Carcinus maenas|GBCM23778-19|Canada|BOLD:AAA7687|MK634897  
Carcinus maenas|GBCM23770-19|United States|BOLD:AAA7687|MK634889  
Carcinus maenas|GBCM23672-19|Canada|BOLD:AAA7687|MK634791  
Carcinus maenas|GBCM23642-19|Canada|BOLD:AAA7687|MK634761  
Carcinus maenas|GBCM23637-19|Canada|BOLD:AAA7687|MK634756  
Carcinus maenas|GBCMD17570-19|Canada|BOLD:AAA7687|HQ129975  
Carcinus maenas|GBCMD17567-19|Canada|BOLD:AAA7687|HQ129972  
Carcinus maenas|GBCMD17563-19|Canada|BOLD:AAA7687|HQ129968  
Carcinus maenas|GBCMD17561-19|Canada|BOLD:AAA7687|HQ129966  
Carcinus maenas|GBCMD17560-19|Canada|BOLD:AAA7687|HQ129965  
Carcinus maenas|GBCMD17557-19|Canada|BOLD:AAA7687|HQ129962  
Carcinus maenas|GBCMD17555-19|Canada|BOLD:AAA7687|HQ129960  
Carcinus maenas|GBCMD17554-19|Canada|BOLD:AAA7687|HQ129959  
Carcinus maenas|GBCMD17549-19|Canada|BOLD:AAA7687|HQ129954  
Carcinus maenas|GBCMD17544-19|Canada|BOLD:AAA7687|HQ129949  
Carcinus maenas|GBCMD17541-19|Canada|BOLD:AAA7687|HQ129946  
Carcinus maenas|GBCMD17538-19|Canada|BOLD:AAA7687|HQ129943  
Carcinus maenas|GBCMD17537-19|Canada|BOLD:AAA7687|HQ129942  
Carcinus maenas|GBCMD17536-19|Canada|BOLD:AAA7687|HQ129941  
Carcinus maenas|GBCMD17532-19|Canada|BOLD:AAA7687|HQ129937  
Carcinus maenas|GBCMD0871-06|Canada|BOLD:AAA7687|DQ523684  
Carcinus maenas|GBCMD25932-19|Canada|BOLD:AAA7687|KY801124  
Carcinus maenas|GBCMD25938-19|Canada|BOLD:AAA7687|KY801151  
Carcinus maenas|GBCMD25935-19|Canada|BOLD:AAA7687|KY801146  
Carcinus maenas|GBCMD25934-19|Canada|BOLD:AAA7687|KY801132  
Carcinus maenas|GBCMD25930-19|Canada|BOLD:AAA7687|KY801122  
Carcinus maenas|GBCMD25928-19|Canada|BOLD:AAA7687|KY801116  
Carcinus maenas|GBCMD25926-19|Canada|BOLD:AAA7687|KY801105  
Carcinus maenas|GBCMD25925-19|Canada|BOLD:AAA7687|KY801088  
Carcinus maenas|GBCMD25923-19|Canada|BOLD:AAA7687|KY801084  
Carcinus maenas|GBCMD25909-19|Canada|BOLD:AAA7687|KY801040  
Carcinus maenas|GBCMD25908-19|Canada|BOLD:AAA7687|KY801026  
Carcinus maenas|GBCMD25907-19|Canada|BOLD:AAA7687|KY801023  
Carcinus maenas|GBCMD25905-19|Canada|BOLD:AAA7687|KY801019  
Carcinus maenas|GBCMD25904-19|Canada|BOLD:AAA7687|KY801018  
Carcinus maenas|GBCMD25892-19|Canada|BOLD:AAA7687|KY800948  
Carcinus maenas|GBCMD25890-19|Canada|BOLD:AAA7687|KY800945  
Carcinus maenas|GBCMD25889-19|Canada|BOLD:AAA7687|KY800936  
Carcinus maenas|GBCM4919-17|Canada|BOLD:AAA7687|KY801114  
Carcinus maenas|GBCM4916-17|Canada|BOLD:AAA7687|KY801117  
Carcinus maenas|GBCM4915-17|Canada|BOLD:AAA7687|KY801113  
Carcinus maenas|GBCM4912-17|Canada|BOLD:AAA7687|KY801115  
Carcinus maenas|GBCM4910-17|Canada|BOLD:AAA7687|KY801130  
Carcinus maenas|GBCM4908-17|Canada|BOLD:AAA7687|KY801133  
Carcinus maenas|GBCM4819-17|Canada|BOLD:AAA7687|KY800922  
Carcinus maenas|GBCM4816-17|Canada|BOLD:AAA7687|KY800921  
Carcinus maenas|GBCM4814-17|Canada|BOLD:AAA7687|KY800926  
Carcinus maenas|GBCM4813-17|Canada|BOLD:AAA7687|KY800929

Carcinus maenas|GBCM4816-17|Canada|BOLD:AAA7687|KY800921  
Carcinus maenas|GBCM4814-17|Canada|BOLD:AAA7687|KY800926  
Carcinus maenas|GBCM4813-17|Canada|BOLD:AAA7687|KY800929  
Carcinus maenas|GBCM4811-17|Canada|BOLD:AAA7687|KY800928  
Carcinus maenas|GBCM4807-17|Canada|BOLD:AAA7687|KY800923  
Carcinus maenas|GBCM4793-17|Canada|BOLD:AAA7687|KY801103  
Carcinus maenas|GBCM4791-17|Canada|BOLD:AAA7687|KY801090  
Carcinus maenas|GBCM4786-17|Canada|BOLD:AAA7687|KY801093  
Carcinus maenas|GBCM4783-17|Canada|BOLD:AAA7687|KY801106  
Carcinus maenas|GBCM4780-17|Canada|BOLD:AAA7687|KY801104  
Carcinus maenas|GBCM4779-17|Canada|BOLD:AAA7687|KY801089  
Carcinus maenas|GBCM4777-17|Canada|BOLD:AAA7687|KY801082  
Carcinus maenas|GBCM4773-17|Canada|BOLD:AAA7687|KY801096  
Carcinus maenas|GBCM4772-17|Canada|BOLD:AAA7687|KY801108  
Carcinus maenas|GBCM4767-17|Canada|BOLD:AAA7687|KY801107  
Carcinus maenas|GBCM4766-17|Canada|BOLD:AAA7687|KY801077  
Carcinus maenas|GBCM4700-17|Canada|BOLD:AAA7687|KY800944  
Carcinus maenas|GBCM4698-17|Canada|BOLD:AAA7687|KY800940  
Carcinus maenas|GBCM4696-17|Canada|BOLD:AAA7687|KY800953  
Carcinus maenas|GBCM4694-17|Canada|BOLD:AAA7687|KY800952  
Carcinus maenas|GBCM4692-17|Canada|BOLD:AAA7687|KY800939  
Carcinus maenas|GBCM4691-17|Canada|BOLD:AAA7687|KY800954  
Carcinus maenas|GBCM4685-17|Canada|BOLD:AAA7687|KY800956  
Carcinus maenas|GBCM4684-17|Canada|BOLD:AAA7687|KY800951  
Carcinus maenas|GBCM4672-17|Canada|BOLD:AAA7687|KY801153  
Carcinus maenas|GBCM4670-17|Canada|BOLD:AAA7687|KY801144  
Carcinus maenas|GBCM4669-17|Canada|BOLD:AAA7687|KY801138  
Carcinus maenas|GBCM4667-17|Canada|BOLD:AAA7687|KY801143  
Carcinus maenas|GBCM4665-17|Canada|BOLD:AAA7687|KY801137  
Carcinus maenas|GBCM4663-17|Canada|BOLD:AAA7687|KY801152  
Carcinus maenas|GBCM4652-17|Canada|BOLD:AAA7687|KY801034  
Carcinus maenas|GBCM4650-17|Canada|BOLD:AAA7687|KY801035  
Carcinus maenas|GBCM4648-17|Canada|BOLD:AAA7687|KY801048  
Carcinus maenas|GBCM4642-17|Canada|BOLD:AAA7687|KY801047  
Carcinus maenas|GBCM4638-17|Canada|BOLD:AAA7687|KY801037  
Carcinus maenas|GBCM4448-17|Canada|BOLD:AAA7687|KY800973  
Carcinus maenas|GBCM4419-17|Canada|BOLD:AAA7687|KY800999  
Carcinus maenas|GBCM4417-17|Canada|BOLD:AAA7687|KY800994  
Carcinus maenas|GBCM4416-17|Canada|BOLD:AAA7687|KY800993  
Carcinus maenas|GBCM4415-17|Canada|BOLD:AAA7687|KY801001  
Carcinus maenas|GBCM4413-17|Canada|BOLD:AAA7687|KY800990  
Carcinus maenas|GBCM4412-17|Canada|BOLD:AAA7687|KY800987  
Carcinus maenas|GBCM4411-17|Canada|BOLD:AAA7687|KY800984  
Carcinus maenas|GBCM4410-17|Canada|BOLD:AAA7687|KY801000  
Carcinus maenas|GBCM4409-17|Canada|BOLD:AAA7687|KY800992  
Carcinus maenas|GBCM4401-17|Canada|BOLD:AAA7687|KY800998  
Carcinus maenas|GBCM4400-17|Canada|BOLD:AAA7687|KY800982  
Carcinus maenas|GBCM4251-17|Canada|BOLD:AAA7687|KY801004  
Carcinus maenas|GBCM4250-17|Canada|BOLD:AAA7687|KY801029  
Carcinus maenas|GBCM4248-17|Canada|BOLD:AAA7687|KY801028  
Carcinus maenas|GBCM4245-17|Canada|BOLD:AAA7687|KY801030  
Carcinus maenas|GBCM4237-17|Canada|BOLD:AAA7687|KY801009  
Carcinus maenas|GBCMD2931-09||BOLD:AAA7687|FJ159011  
Carcinus maenas|GBCM4913-17|Canada|BOLD:AAA7687|KY801119  
Carcinus maenas|GBCM23803-19|Canada|BOLD:AAA7687|MK634922  
Carcinus maenas|GBCM23812-19|Canada|BOLD:AAA7687|MK634931  
Carcinus maenas|GBCM23845-19|Canada|BOLD:AAA7687|MK634964  
Carcinus maenas|GBCM23852-19|Canada|BOLD:AAA7687|MK634971  
Carcinus maenas|GBCM23854-19|Canada|BOLD:AAA7687|MK634973  
Carcinus maenas|GBCM23859-19|Canada|BOLD:AAA7687|MK634978  
Carcinus maenas|GBCM23861-19|Canada|BOLD:AAA7687|MK634980  
Carcinus maenas|GBCM23868-19|Canada|BOLD:AAA7687|MK634987  
Carcinus maenas|GBCM23871-19|Canada|BOLD:AAA7687|MK634990  
Carcinus maenas|GBCM23876-19|United States|BOLD:AAA7687|MK634995  
Carcinus maenas|GBCMD2883-09||BOLD:AAA7687|FJ159059  
Carcinus maenas|GBCMD2896-09||BOLD:AAA7687|FJ159046  
Carcinus maenas|GBCMD2912-09||BOLD:AAA7687|FJ159030  
Carcinus maenas|GBCMD2859-09||BOLD:AAA7687|FJ159083  
Carcinus maenas|GBCMD2869-09||BOLD:AAA7687|FJ159073  
Carcinus maenas|GBCMD2927-09||BOLD:AAA7687|FJ159015  
Carcinus maenas|GBMND85358-21||BOLD:AAA7687|MT547786  
Carcinus maenas|GBCMD0389-06|Portugal|BOLD:AAA7687|AY616440  
Carcinus maenas|GBCMD2905-09||BOLD:AAA7687|FJ159037  
Carcinus maenas|GBCMD2926-09||BOLD:AAA7687|FJ159016  
Carcinus maenas|GBCM10207-17||BOLD:AAA7687|KT952476  
Carcinus maenas|GBMND85359-21||BOLD:AAA7687|MT547787  
Carcinus maenas|GBCMD2880-09||BOLD:AAA7687|FJ159062  
Carcinus maenas|GBMND85365-21||BOLD:AAA7687|MT547793  
Carcinus maenas|GBCMD2881-09||BOLD:AAA7687|FJ159061  
Carcinus maenas|GBMND85375-21||BOLD:AAA7687|MT547803  
Carcinus maenas|GBCMD2862-09||BOLD:AAA7687|FJ159080  
Carcinus maenas|GBCMD2893-09||BOLD:AAA7687|FJ159049  
Carcinus maenas|GBCMD2891-09||BOLD:AAA7687|FJ159051  
Carcinus maenas|GBCMD2908-09||BOLD:AAA7687|FJ159034  
Carcinus maenas|GBMND85360-21||BOLD:AAA7687|MT547788  
Carcinus maenas|GBCMD2924-09||BOLD:AAA7687|FJ159018  
Carcinus maenas|GBCMD2857-09||BOLD:AAA7687|FJ159085  
Carcinus maenas|GBCMD2868-09||BOLD:AAA7687|FJ159074  
Carcinus maenas|GBCMD2888-09||BOLD:AAA7687|FJ159054  
Carcinus maenas|GBCMD0873-06|Canada|BOLD:AAA7687|DQ523686  
Carcinus maenas|WW636-08|Canada|BOLD:AAA7687  
Carcinus maenas|GBCMD2907-09||BOLD:AAA7687|FJ159035  
Carcinus maenas|GBCMD2919-09||BOLD:AAA7687|FJ159023  
Carcinus maenas|GBCMD2928-09||BOLD:AAA7687|FJ159014  
Carcinus maenas|GBCM4252-17|Canada|BOLD:AAA7687|KY801024  
Carcinus maenas|GBMND85380-21||BOLD:AAA7687|MT547808  
Carcinus maenas|GBCMD2915-09||BOLD:AAA7687|FJ159027  
Carcinus maenas|GBCMD2913-09||BOLD:AAA7687|FJ159029  
Carcinus maenas|GBCMD0391-06|Sweden|BOLD:AAA7687|AY616442  
Carcinus maenas|GBCMD2860-09||BOLD:AAA7687|FJ159082  
Carcinus maenas|GBCMD2894-09||BOLD:AAA7687|FJ159048  
Carcinus maenas|GBCMD2917-09||BOLD:AAA7687|FJ159025

Carcinus maenas|GBCMD2860-09|BOLD:AAA7687|FJ159082  
Carcinus maenas|GBCMD2894-09|BOLD:AAA7687|FJ159048  
Carcinus maenas|GBCMD2917-09|BOLD:AAA7687|FJ159025  
Carcinus maenas|BNSDE360-14|North Sea|BOLD:AAA7687|KT209348  
Carcinus maenas|GBCMD2900-09|BOLD:AAA7687|FJ159042  
Carcinus maenas|GBCMD2901-09|BOLD:AAA7687|FJ159041  
Carcinus maenas|GBCMD29170-19|United Kingdom|BOLD:AAA7687|MH931388  
Carcinus maenas|JSDN003-08|Norway|BOLD:AAA7687|JQ305942  
Carcinus maenas|WW659-08|Canada|BOLD:AAA7687  
Carcinus maenas|JSDN001-08|Norway|BOLD:AAA7687|JQ305941  
Carcinus maenas|GBCMD23837-19|Canada|BOLD:AAA7687|MK634956  
Carcinus maenas|GBCMD23831-19|Canada|BOLD:AAA7687|MK634950  
Carcinus maenas|GBCMD23830-19|Canada|BOLD:AAA7687|MK634949  
Carcinus maenas|GBCMD23829-19|Canada|BOLD:AAA7687|MK634948  
Carcinus maenas|GBCMD23827-19|Canada|BOLD:AAA7687|MK634946  
Carcinus maenas|GBCMD23824-19|Canada|BOLD:AAA7687|MK634943  
Carcinus maenas|GBCMD23822-19|Canada|BOLD:AAA7687|MK634941  
Carcinus maenas|GBCMD23820-19|Canada|BOLD:AAA7687|MK634939  
Carcinus maenas|GBCMD23817-19|Canada|BOLD:AAA7687|MK634936  
Carcinus maenas|GBCMD23816-19|Canada|BOLD:AAA7687|MK634935  
Carcinus maenas|GBCMD23815-19|Canada|BOLD:AAA7687|MK634934  
Carcinus maenas|GBCMD23814-19|Canada|BOLD:AAA7687|MK634933  
Carcinus maenas|GBCMD23808-19|Canada|BOLD:AAA7687|MK634927  
Carcinus maenas|GBCMD23802-19|Canada|BOLD:AAA7687|MK634921  
Carcinus maenas|GBCMD23797-19|Canada|BOLD:AAA7687|MK634916  
Carcinus maenas|GBCMD23791-19|Canada|BOLD:AAA7687|MK634910  
Carcinus maenas|GBCMD23787-19|Canada|BOLD:AAA7687|MK634906  
Carcinus maenas|GBCMD23784-19|Canada|BOLD:AAA7687|MK634903  
Carcinus maenas|GBCMD23780-19|Canada|BOLD:AAA7687|MK634899  
Carcinus maenas|GBCMD23691-19|Canada|BOLD:AAA7687|MK634810  
Carcinus maenas|GBCMD23684-19|Canada|BOLD:AAA7687|MK634803  
Carcinus maenas|GBCMD23683-19|Canada|BOLD:AAA7687|MK634802  
Carcinus maenas|GBCMD23677-19|Canada|BOLD:AAA7687|MK634796  
Carcinus maenas|GBCMD23669-19|Canada|BOLD:AAA7687|MK634788  
Carcinus maenas|GBCMD23664-19|Canada|BOLD:AAA7687|MK634783  
Carcinus maenas|GBCMD23826-19|Canada|BOLD:AAA7687|MK634945  
Carcinus maenas|GBCMD23811-19|Canada|BOLD:AAA7687|MK634930  
Carcinus maenas|GBCMD23799-19|Canada|BOLD:AAA7687|MK634918  
Carcinus maenas|WWGSL316-08|Canada|BOLD:AAA7687  
Carcinus maenas|BBGCO142-14|Canada|BOLD:AAA7687|MF751709  
Carcinus maenas|GBCMD17545-19|Canada|BOLD:AAA7687|HQ129950  
Carcinus maenas|GBCMD17553-19|Canada|BOLD:AAA7687|HQ129958  
Carcinus maenas|GBCMD17540-19|Canada|BOLD:AAA7687|HQ129945  
Carcinus maenas|GBCMD17539-19|Canada|BOLD:AAA7687|HQ129944  
Carcinus maenas|GBCMD17535-19|Canada|BOLD:AAA7687|HQ129940  
Carcinus maenas|GBCMD17533-19|Canada|BOLD:AAA7687|HQ129938  
Carcinus maenas|GBCMD0387-06|Norway|BOLD:AAA7687|AY616438  
Carcinus maenas|GBCMD4244-17|Canada|BOLD:AAA7687|KY801012  
Carcinus maenas|GBCMD4239-17|Canada|BOLD:AAA7687|KY801015  
Carcinus maenas|GBCMD2930-09|BOLD:AAA7687|FJ159012  
Carcinus maenas|GBCMD4246-17|Canada|BOLD:AAA7687|KY801020  
Carcinus maenas|GBCMD4254-17|Canada|BOLD:AAA7687|KY801006  
Carcinus maenas|GBCMD4406-17|Canada|BOLD:AAA7687|KY800989  
Carcinus maenas|GBCMD4414-17|Canada|BOLD:AAA7687|KY800996  
Carcinus maenas|GBCMD4418-17|Canada|BOLD:AAA7687|KY801002  
Carcinus maenas|GBCMD4462-17|Canada|BOLD:AAA7687|KY800967  
Carcinus maenas|GBCMD4637-17|Canada|BOLD:AAA7687|KY801043  
Carcinus maenas|GBCMD4639-17|Canada|BOLD:AAA7687|KY801031  
Carcinus maenas|GBCMD4649-17|Canada|BOLD:AAA7687|KY801042  
Carcinus maenas|GBCMD4651-17|Canada|BOLD:AAA7687|KY801036  
Carcinus maenas|GBCMD4660-17|Canada|BOLD:AAA7687|KY801145  
Carcinus maenas|GBCMD4661-17|Canada|BOLD:AAA7687|KY801140  
Carcinus maenas|GBCMD4664-17|Canada|BOLD:AAA7687|KY801136  
Carcinus maenas|GBCMD4668-17|Canada|BOLD:AAA7687|KY801139  
Carcinus maenas|GBCMD4671-17|Canada|BOLD:AAA7687|KY801135  
Carcinus maenas|GBCMD4673-17|Canada|BOLD:AAA7687|KY801134  
Carcinus maenas|GBCMD4675-17|Canada|BOLD:AAA7687|KY801142  
Carcinus maenas|GBCMD4676-17|Canada|BOLD:AAA7687|KY801149  
Carcinus maenas|GBCMD4687-17|Canada|BOLD:AAA7687|KY800958  
Carcinus maenas|GBCMD4693-17|Canada|BOLD:AAA7687|KY800957  
Carcinus maenas|GBCMD4695-17|Canada|BOLD:AAA7687|KY800949  
Carcinus maenas|GBCMD4697-17|Canada|BOLD:AAA7687|KY800941  
Carcinus maenas|GBCMD4699-17|Canada|BOLD:AAA7687|KY800943  
Carcinus maenas|GBCMD4701-17|Canada|BOLD:AAA7687|KY800955  
Carcinus maenas|GBCMD4768-17|Canada|BOLD:AAA7687|KY801091  
Carcinus maenas|GBCMD4771-17|Canada|BOLD:AAA7687|KY801111  
Carcinus maenas|GBCMD4774-17|Canada|BOLD:AAA7687|KY801109  
Carcinus maenas|GBCMD4778-17|Canada|BOLD:AAA7687|KY801102  
Carcinus maenas|GBCMD4784-17|Canada|BOLD:AAA7687|KY801094  
Carcinus maenas|GBCMD4790-17|Canada|BOLD:AAA7687|KY801098  
Carcinus maenas|GBCMD4792-17|Canada|BOLD:AAA7687|KY801101  
Carcinus maenas|GBCMD4804-17|Canada|BOLD:AAA7687|KY800924  
Carcinus maenas|GBCMD4808-17|Canada|BOLD:AAA7687|KY800935  
Carcinus maenas|GBCMD4818-17|Canada|BOLD:AAA7687|KY800920  
Carcinus maenas|GBCMD4820-17|Canada|BOLD:AAA7687|KY800930  
Carcinus maenas|GBCMD4821-17|Canada|BOLD:AAA7687|KY800917  
Carcinus maenas|GBCMD4906-17|Canada|BOLD:AAA7687|KY801128  
Carcinus maenas|GBCMD4914-17|Canada|BOLD:AAA7687|KY801131  
Carcinus maenas|GBCMD4917-17|Canada|BOLD:AAA7687|KY801120  
Carcinus maenas|GBCMD25887-19|Canada|BOLD:AAA7687|KY800919  
Carcinus maenas|GBCMD25891-19|Canada|BOLD:AAA7687|KY800947  
Carcinus maenas|GBCMD25900-19|Canada|BOLD:AAA7687|KY801005  
Carcinus maenas|GBCMD25903-19|Canada|BOLD:AAA7687|KY801011  
Carcinus maenas|GBCMD25906-19|Canada|BOLD:AAA7687|KY801021  
Carcinus maenas|GBCMD25911-19|Canada|BOLD:AAA7687|KY801046  
Carcinus maenas|GBCMD25922-19|Canada|BOLD:AAA7687|KY801083  
Carcinus maenas|GBCMD25936-19|Canada|BOLD:AAA7687|KY801147  
Carcinus maenas|GBCMD23841-19|Canada|BOLD:AAA7687|MK634960  
Carcinus maenas|GBCMD23844-19|Canada|BOLD:AAA7687|MK634963  
Carcinus maenas|GBCMD23847-19|Canada|BOLD:AAA7687|MK634966  
Carcinus maenas|GBCMD23848-19|Canada|BOLD:AAA7687|MK634967  
Carcinus maenas|GBCMD23850-19|Canada|BOLD:AAA7687|MK634960

Carcinus maenas|GBCM23847-19|Canada|BOLD:AAA7687|MK634966  
Carcinus maenas|GBCM23848-19|Canada|BOLD:AAA7687|MK634967  
Carcinus maenas|GBCM23850-19|Canada|BOLD:AAA7687|MK634969  
Carcinus maenas|GBCM23858-19|Canada|BOLD:AAA7687|MK634977  
Carcinus maenas|GBCM23860-19|Canada|BOLD:AAA7687|MK634979  
Carcinus maenas|GBCM23865-19|Canada|BOLD:AAA7687|MK634984  
Carcinus maenas|GBCM23867-19|Canada|BOLD:AAA7687|MK634986  
Carcinus maenas|GBCM23869-19|Canada|BOLD:AAA7687|MK634988  
Carcinus maenas|GBCM23875-19|United States|BOLD:AAA7687|MK634994  
Carcinus maenas|GBMND85369-21|BOLD:AAA7687|MT547797  
Carcinus maenas|GBCMD19669-19|BOLD:AAA7687|KF709205  
Carcinus maenas|GBMND85374-21|BOLD:AAA7687|MT547802  
Carcinus maenas|GBCMD19670-19|BOLD:AAA7687|KF709206  
Carcinus maenas|GBCMD2885-09|BOLD:AAA7687|FJ159057  
Carcinus maenas|BNSDE294-13|North Sea|BOLD:AAA7687|KT208908  
Carcinus maenas|GBMND85382-21|BOLD:AAA7687|MT547810  
Carcinus maenas|WW631-08|Canada|BOLD:AAA7687  
Carcinus maenas|GBCM23870-19|Canada|BOLD:AAA7687|MK634989  
Carcinus maenas|GBCM23864-19|Canada|BOLD:AAA7687|MK634983  
Carcinus maenas|GBCM23863-19|Canada|BOLD:AAA7687|MK634982  
Carcinus maenas|GBCM23862-19|Canada|BOLD:AAA7687|MK634981  
Carcinus maenas|GBCM23857-19|Canada|BOLD:AAA7687|MK634976  
Carcinus maenas|GBCM23855-19|Canada|BOLD:AAA7687|MK634974  
Carcinus maenas|GBCM23853-19|Canada|BOLD:AAA7687|MK634972  
Carcinus maenas|GBCM23851-19|Canada|BOLD:AAA7687|MK634970  
Carcinus maenas|GBCM23846-19|Canada|BOLD:AAA7687|MK634965  
Carcinus maenas|GBCM23843-19|Canada|BOLD:AAA7687|MK634962  
Carcinus maenas|GBCM23838-19|Canada|BOLD:AAA7687|MK634957  
Carcinus maenas|GBCM23836-19|Canada|BOLD:AAA7687|MK634955  
Carcinus maenas|GBCM23834-19|Canada|BOLD:AAA7687|MK634953  
Carcinus maenas|GBCM23828-19|Canada|BOLD:AAA7687|MK634947  
Carcinus maenas|GBCM23818-19|Canada|BOLD:AAA7687|MK634937  
Carcinus maenas|GBCM23810-19|Canada|BOLD:AAA7687|MK634929  
Carcinus maenas|GBCM23807-19|Canada|BOLD:AAA7687|MK634926  
Carcinus maenas|GBCM23805-19|Canada|BOLD:AAA7687|MK634924  
Carcinus maenas|GBCM23804-19|Canada|BOLD:AAA7687|MK634923  
Carcinus maenas|GBCM23798-19|Canada|BOLD:AAA7687|MK634917  
Carcinus maenas|GBCM23795-19|Canada|BOLD:AAA7687|MK634914  
Carcinus maenas|GBCM23792-19|Canada|BOLD:AAA7687|MK634911  
Carcinus maenas|GBCM23789-19|Canada|BOLD:AAA7687|MK634908  
Carcinus maenas|GBCM23786-19|Canada|BOLD:AAA7687|MK634905  
Carcinus maenas|GBCM23783-19|Canada|BOLD:AAA7687|MK634902  
Carcinus maenas|GBCM23779-19|Canada|BOLD:AAA7687|MK634898  
Carcinus maenas|GBCM23710-19|United States|BOLD:AAA7687|MK634829  
Carcinus maenas|GBCM23676-19|Canada|BOLD:AAA7687|MK634795  
Carcinus maenas|GBCM23660-19|Canada|BOLD:AAA7687|MK634779  
Carcinus maenas|GBCM23654-19|Canada|BOLD:AAA7687|MK634773  
Carcinus maenas|GBCM23653-19|Canada|BOLD:AAA7687|MK634772  
Carcinus maenas|GBCM23647-19|Canada|BOLD:AAA7687|MK634766  
Carcinus maenas|GBCM23644-19|Canada|BOLD:AAA7687|MK634763  
Carcinus maenas|GBCM23628-19|Canada|BOLD:AAA7687|MK634747  
Carcinus maenas|GBCMD17542-19|Canada|BOLD:AAA7687|HQ129947  
Carcinus maenas|GBCMD0388-06|Germany|BOLD:AAA7687|AY616439  
Carcinus maenas|GBMND85367-21|BOLD:AAA7687|MT547795  
Carcinus maenas|GBCMD2895-09|BOLD:AAA7687|FJ159047  
Carcinus maenas|GBCM4247-17|Canada|BOLD:AAA7687|KY801027  
Carcinus maenas|GBCM23840-19|Canada|BOLD:AAA7687|MK634959  
Carcinus maenas|GBCM23839-19|Canada|BOLD:AAA7687|MK634958  
Carcinus maenas|GBCMD25910-19|Canada|BOLD:AAA7687|KY801044  
Carcinus maenas|GBCMD25912-19|Canada|BOLD:AAA7687|KY801049  
Carcinus maenas|GBCMD25913-19|Canada|BOLD:AAA7687|KY801052  
Carcinus maenas|GBCMD25927-19|Canada|BOLD:AAA7687|KY801110  
Carcinus maenas|GBCMD25929-19|Canada|BOLD:AAA7687|KY801118  
Carcinus maenas|GBCMD25931-19|Canada|BOLD:AAA7687|KY801123  
Carcinus maenas|GBCMD25933-19|Canada|BOLD:AAA7687|KY801129  
Carcinus maenas|GBCMD25937-19|Canada|BOLD:AAA7687|KY801148  
Carcinus maenas|GBCMD25939-19|Canada|BOLD:AAA7687|KY801154  
Carcinus maenas|GBMND85357-21|BOLD:AAA7687|MT547785  
Carcinus maenas|GBCMD25898-19|Canada|BOLD:AAA7687|KY800985  
Carcinus maenas|GBCMD25899-19|Canada|BOLD:AAA7687|KY800988  
Carcinus maenas|GBCMD25888-19|Canada|BOLD:AAA7687|KY800927  
Carcinus maenas|GBCMD25893-19|Canada|BOLD:AAA7687|KY800950  
Carcinus maenas|GBCM4911-17|Canada|BOLD:AAA7687|KY801126  
Carcinus maenas|GBCM4918-17|Canada|BOLD:AAA7687|KY801127  
Carcinus maenas|GBCM4822-17|Canada|BOLD:AAA7687|KY800925  
Carcinus maenas|GBCM4905-17|Canada|BOLD:AAA7687|KY801125  
Carcinus maenas|GBCM4782-17|Canada|BOLD:AAA7687|KY801095  
Carcinus maenas|GBCM4805-17|Canada|BOLD:AAA7687|KY800934  
Carcinus maenas|GBCM4812-17|Canada|BOLD:AAA7687|KY800933  
Carcinus maenas|GBCM4817-17|Canada|BOLD:AAA7687|KY800915  
Carcinus maenas|GBCM4666-17|Canada|BOLD:AAA7687|KY801141  
Carcinus maenas|GBCM4674-17|Canada|BOLD:AAA7687|KY801155  
Carcinus maenas|GBCM4686-17|Canada|BOLD:AAA7687|KY800937  
Carcinus maenas|GBCM4688-17|Canada|BOLD:AAA7687|KY800942  
Carcinus maenas|GBCM4689-17|Canada|BOLD:AAA7687|KY800946  
Carcinus maenas|GBCM4690-17|Canada|BOLD:AAA7687|KY800938  
Carcinus maenas|GBCM4653-17|Canada|BOLD:AAA7687|KY801039  
Carcinus maenas|GBCM4662-17|Canada|BOLD:AAA7687|KY801150  
Carcinus maenas|GBCM4907-17|Canada|BOLD:AAA7687|KY801112  
Carcinus maenas|GBCM4909-17|Canada|BOLD:AAA7687|KY801121  
Carcinus maenas|GBCM4806-17|Canada|BOLD:AAA7687|KY800918  
Carcinus maenas|GBCM4810-17|Canada|BOLD:AAA7687|KY800932  
Carcinus maenas|GBCM4646-17|Canada|BOLD:AAA7687|KY801050  
Carcinus maenas|GBCM4647-17|Canada|BOLD:AAA7687|KY801038  
Carcinus maenas|GBCM4644-17|Canada|BOLD:AAA7687|KY801045  
Carcinus maenas|GBCM4645-17|Canada|BOLD:AAA7687|KY801051  
Carcinus maenas|GBCM4640-17|Canada|BOLD:AAA7687|KY801032  
Carcinus maenas|GBCM4643-17|Canada|BOLD:AAA7687|KY801041  
Carcinus maenas|GBCM4407-17|Canada|BOLD:AAA7687|KY800995  
Carcinus maenas|GBCM4408-17|Canada|BOLD:AAA7687|KY801003  
Carcinus maenas|GBCM4404-17|Canada|BOLD:AAA7687|KY800991

Carcinus maenas|GBCM4401-17|Canada|BOLD:AAA7687|KY800995  
Carcinus maenas|GBCM4408-17|Canada|BOLD:AAA7687|KY801003  
Carcinus maenas|GBCM4404-17|Canada|BOLD:AAA7687|KY800991  
Carcinus maenas|GBCM4405-17|Canada|BOLD:AAA7687|KY800997  
Carcinus maenas|GBCM4402-17|Canada|BOLD:AAA7687|KY800983  
Carcinus maenas|GBCM4403-17|Canada|BOLD:AAA7687|KY800986  
Carcinus maenas|GBCM4253-17|Canada|BOLD:AAA7687|KY801017  
Carcinus maenas|GBCM4243-17|Canada|BOLD:AAA7687|KY801010  
Carcinus maenas|GBCM4241-17|Canada|BOLD:AAA7687|KY801014  
Carcinus maenas|GBCM4238-17|Canada|BOLD:AAA7687|KY801025  
Carcinus maenas|GBCM3834-17|United States|BOLD:AAA7687|KY801176  
Carcinus maenas|GBCMD2929-09|BOLD:AAA7687|FJ159013  
Carcinus maenas|GBCMD2861-09|BOLD:AAA7687|FJ159081  
Carcinus maenas|GBCM23806-19|Canada|BOLD:AAA7687|MK634925  
Carcinus maenas|FCCOM247-11|Portugal|BOLD:AAA7687  
Carcinus maenas|WW668-08|Canada|BOLD:AAA7687  
Carcinus maenas|WW662-08|Canada|BOLD:AAA7687|FJ581596  
Carcinus maenas|WW746-08|Canada|BOLD:AAA7687  
Carcinus maenas|FCCOM244-11|Portugal|BOLD:AAA7687  
Carcinus maenas|BNSC511-14|North Sea|BOLD:AAA7687|KT208409  
Carcinus maenas|BNSDE364-14|North Sea|BOLD:AAA7687|KT209252  
Carcinus maenas|OZIMP053-15|Canada|BOLD:AAA7687  
Carcinus maenas|GBCM23793-19|Canada|BOLD:AAA7687|MK634912  
Carcinus maenas|GBMNB52881-20|Canada|BOLD:AAA7687|MN184686  
Carcinus maenas|GBCM3841-17|United States|BOLD:AAA7687|KY801175  
Carcinus maenas|GBCMD2889-09|BOLD:AAA7687|FJ159053  
Carcinus maenas|GBCMD2921-09|BOLD:AAA7687|FJ159021  
Carcinus maenas|GBCMD2899-09|BOLD:AAA7687|FJ159043  
Carcinus maenas|GBMND85363-21|BOLD:AAA7687|MT547791  
Carcinus maenas|GBCMD2909-09|BOLD:AAA7687|FJ159033  
Carcinus maenas|GBCMD2858-09|BOLD:AAA7687|FJ159084  
Carcinus maenas|GBCMD2872-09|BOLD:AAA7687|FJ159070  
Carcinus maenas|GBCMD2877-09|BOLD:AAA7687|FJ159065  
Carcinus maenas|GBCMD2911-09|BOLD:AAA7687|FJ159031  
Carcinus maenas|GBCMD0393-06|Faeroe Islands|BOLD:AAA7687|AY616444  
Carcinus maenas|GBCMD2925-09|BOLD:AAA7687|FJ159017  
Carcinus maenas|GBCMD2866-09|BOLD:AAA7687|FJ159076  
Carcinus maenas|GBCMD2892-09|BOLD:AAA7687|FJ159050  
Carcinus maenas|GBMND85366-21|BOLD:AAA7687|MT547794  
Carcinus maenas|GBMND85379-21|BOLD:AAA7687|MT547807  
Carcinus maenas|GBMND85383-21|BOLD:AAA7687|MT547811  
Carcinus maenas|GBCMA10282-15|BOLD:AAA7687|KM114885  
Carcinus maenas|CAISN1463-14|Canada|BOLD:ACL8382  
Carcinus maenas|GBCMA10281-15|BOLD:AAA7687|KM114884  
Goneplax rhomboides|FCDPH035-07|Morocco|BOLD:AAB5890|JN591678  
Goneplax rhomboides|JSDPX036-08|Portugal|BOLD:AAB5890|JN591690  
Goneplax rhomboides|SWEMA862-15|Sweden|BOLD:AAB5890|MG935224  
Goneplax rhomboides|SWEMA847-15|Sweden|BOLD:AAB5890|MG935338  
Goneplax rhomboides|BNSDE283-12|North Sea|BOLD:AAB5890|KT209298  
Goneplax rhomboides|BNSDE110-12|North Sea|BOLD:AAB5890|KT208720  
Goneplax rhomboides|BNSDE108-12|North Sea|BOLD:AAB5890|KT209383  
Goneplax rhomboides|FCDOP020-07|Portugal|BOLD:AAB5890|JN591680  
Goneplax rhomboides|FCDOP019-07|Portugal|BOLD:AAB5890|JN591679  
Goneplax rhomboides|BNSDE284-12|North Sea|BOLD:AAB5890|KT208413  
Goneplax rhomboides|FCDOP057-07|Portugal|BOLD:AAB5890|JN591688  
Goneplax rhomboides|FCDOP056-07|Portugal|BOLD:AAB5890|JN591687  
Goneplax rhomboides|JSDME022-08|Italy|BOLD:AAB5890|JN591681  
Goneplax rhomboides|JSDUK038-08|United Kingdom|BOLD:AAB5890|JN591683  
Goneplax rhomboides|JSDPX035-08|Portugal|BOLD:AAB5890|JN591689  
Goneplax rhomboides|FCDOP114-07|Portugal|BOLD:AAB5890|JN591674  
Goneplax rhomboides|JSDPX112-08|Portugal|BOLD:AAB5890|JN591691  
Goneplax rhomboides|JSDUK040-08|United Kingdom|BOLD:AAB5890|JN591685  
Goneplax rhomboides|JSDUK037-08|United Kingdom|BOLD:AAB5890|JN591682  
Goneplax rhomboides|FCDOP113-07|Portugal|BOLD:AAB5890|JN591673  
Goneplax rhomboides|JSDUK039-08|United Kingdom|BOLD:AAB5890|JN591684  
Goneplax rhomboides|FCDOP117-07|Portugal|BOLD:AAB5890|JN591677  
Goneplax rhomboides|FCDOP116-07|Portugal|BOLD:AAB5890|JN591676  
Goneplax rhomboides|FCDOP115-07|Portugal|BOLD:AAB5890|JN591675  
Goneplax rhomboides|JSDUK041-08|United Kingdom|BOLD:AAB5890|JN591686  
Goneplax rhomboides|JSDPX113-08|Portugal|BOLD:AAB5890|JN591692  
Goneplax rhomboides|BNSC088-10|North Sea|BOLD:AAB5890|KT208641  
Goneplax rhomboides|BNSC089-10|North Sea|BOLD:AAB5890|KT208528  
Goneplax rhomboides|GBCMD17762-19|BOLD:AAB5890|JN591694  
Goneplax rhomboides|GBCMD17761-19|BOLD:ADV9470|JN591693  
Goneplax rhomboides|GBCMD17763-19|BOLD:ADV9470|JN591695  
Goneplax rhomboides|GBCMD17764-19|BOLD:ADV9471|JN591696  
Goneplax rhomboides|GBCMD17765-19|BOLD:ADV9471|JN591697  
Percnon gibbesi|JSDAZ077-08|Portugal|BOLD:AAC3991|JQ306096  
Percnon gibbesi|JSDAZ076-08|Portugal|BOLD:AAC3991|JQ306100  
Percnon gibbesi|JSDAZ075-08|Portugal|BOLD:AAC3991|JQ306099  
Percnon gibbesi|JSDAZ039-08|Portugal|BOLD:AAC3991|JQ306098  
Percnon gibbesi|JSDAZ040-08|Portugal|BOLD:AAC3991|JQ306097  
Percnon gibbesi|JSDAZ041-08|Portugal|BOLD:AAC3991|JQ306101  
Percnon gibbesi|JSDAZ079-08|Portugal|BOLD:AAC3991|JQ306102  
Percnon gibbesi|AMINV046-08|Philippines|BOLD:AAC3992  
Percnon gibbesi|AMINV044-08|Philippines|BOLD:AAC3992  
Percnon gibbesi|AMINV045-08|Philippines|BOLD:AAC3992  
Percnon gibbesi|AMINV042-08|Philippines|BOLD:AAC3992  
Percnon gibbesi|AMINV043-08|Philippines|BOLD:AAC3992  
Percnon gibbesi|ABBAG111-12|Panama|BOLD:AAC3992|MN183874  
Percnon gibbesi|ABBAG304-12|Panama|BOLD:AAC3992|MN184217  
Pachygrapsus gracilis|GBCMD24444-19|Spain|BOLD:ACI9903|KU163295  
Pachygrapsus gracilis|GBCMD24445-19|Spain|BOLD:ACI9903|KU163296  
Pachygrapsus gracilis|ABBAG247-12|Panama|BOLD:ACU0366|MN183930  
Pachygrapsus gracilis|ABBAG018-12|Panama|BOLD:ACU0366|MN183941  
Pachygrapsus gracilis|GBCMD17767-19|Panama|BOLD:ACU0366|EU329166  
Pachygrapsus gracilis|GBCMD28306-19|Brazil|BOLD:ACU0366|MF490106  
Calappa hepatica|KANBI1365-19|United States|BOLD:ADX2250  
Calappa hepatica|GBMND15373-21|United States|BOLD:ADX2250|MW278694  
Calappa hepatica|KANBI438-19|United States|BOLD:ADX2250  
Calappa hepatica|GBMND15374-21|United States|BOLD:ADX2250|MW278012  
Calappa hepatica|KANBI1112-19|United States|BOLD:ADX2250

Calappa hepatica|KANBI438-19|United States|BOLD:ADX2250  
Calappa hepatica|GBMND15374-21|United States|BOLD:ADX2250|MW278012  
Calappa hepatica|KANBI1112-19|United States|BOLD:ADX2250  
Calappa hepatica|GBMND15375-21|United States|BOLD:ADX2250|MW278518  
Calappa hepatica|MBMIA196-06|French Polynesia|BOLD:AAG3944  
Calappidae|RBGC081-03|BOLD:AAG3944  
Calappa hepatica|GBMND15376-21|BOLD:AAG3944|MT531613  
Grandidierella japonica|GBCMA5598-13|BOLD:ACI2381|KC248827  
Grandidierella japonica|GBCMA5605-13|BOLD:ACI2381|KC248820  
Grandidierella japonica|GBCMA5644-13|BOLD:ACI2381|KC248781  
Grandidierella japonica|GBCMA5613-13|BOLD:ACI2381|KC248812  
Grandidierella japonica|GBCMA5607-13|BOLD:ACI2381|KC248818  
Grandidierella japonica|GBCMA5623-13|BOLD:ACI2381|KC248802  
Grandidierella japonica|GBCMA5658-13|BOLD:ACI2381|KC248767  
Grandidierella japonica|GBCMA5597-13|BOLD:ACI2381|KC248828  
Grandidierella japonica|GBCMA5599-13|BOLD:ACI2381|KC248826  
Grandidierella japonica|GBCMA5600-13|BOLD:ACI2381|KC248825  
Grandidierella japonica|GBCMA5601-13|BOLD:ACI2381|KC248824  
Grandidierella japonica|GBCMA5602-13|BOLD:ACI2381|KC248823  
Grandidierella japonica|GBCMA5603-13|BOLD:ACI2381|KC248822  
Grandidierella japonica|GBCMA5604-13|BOLD:ACI2381|KC248821  
Grandidierella japonica|GBCMA5606-13|BOLD:ACI2381|KC248819  
Grandidierella japonica|GBCMA5608-13|BOLD:ACI2381|KC248817  
Grandidierella japonica|GBCMA5609-13|BOLD:ACI2381|KC248816  
Grandidierella japonica|GBCMA5610-13|BOLD:ACI2381|KC248815  
Grandidierella japonica|GBCMA5611-13|BOLD:ACI2381|KC248814  
Grandidierella japonica|GBCMA5612-13|BOLD:ACI2381|KC248813  
Grandidierella japonica|GBCMA5614-13|BOLD:ACI2381|KC248811  
Grandidierella japonica|GBCMA5615-13|BOLD:ACI2381|KC248810  
Grandidierella japonica|GBCMA5616-13|BOLD:ACI2381|KC248809  
Grandidierella japonica|GBCMA5617-13|BOLD:ACI2381|KC248808  
Grandidierella japonica|GBCMA5618-13|BOLD:ACI2381|KC248807  
Grandidierella japonica|GBCMA5619-13|BOLD:ACI2381|KC248806  
Grandidierella japonica|GBCMA5620-13|BOLD:ACI2381|KC248805  
Grandidierella japonica|GBCMA5621-13|BOLD:ACI2381|KC248804  
Grandidierella japonica|GBCMA5622-13|BOLD:ACI2381|KC248803  
Grandidierella japonica|GBCMA5624-13|BOLD:ACI2381|KC248801  
Grandidierella japonica|GBCMA5625-13|BOLD:ACI2381|KC248800  
Grandidierella japonica|GBCMA5626-13|BOLD:ACI2381|KC248799  
Grandidierella japonica|GBCMA5627-13|BOLD:ACI2381|KC248798  
Grandidierella japonica|GBCMA5631-13|BOLD:ACI2381|KC248794  
Grandidierella japonica|GBCMA5632-13|BOLD:ACI2381|KC248793  
Grandidierella japonica|GBCMA5633-13|BOLD:ACI2381|KC248792  
Grandidierella japonica|GBCMA5634-13|BOLD:ACI2381|KC248791  
Grandidierella japonica|GBCMA5635-13|BOLD:ACI2381|KC248790  
Grandidierella japonica|GBCMA5638-13|BOLD:ACI2381|KC248787  
Grandidierella japonica|GBCMA5639-13|BOLD:ACI2381|KC248786  
Grandidierella japonica|GBCMA5640-13|BOLD:ACI2381|KC248785  
Grandidierella japonica|GBCMA5645-13|BOLD:ACI2381|KC248780  
Grandidierella japonica|GBCMA5647-13|BOLD:ACI2381|KC248778  
Grandidierella japonica|GBCMA5648-13|BOLD:ACI2381|KC248777  
Grandidierella japonica|GBCMA5649-13|BOLD:ACI2381|KC248776  
Grandidierella japonica|GBCMA5651-13|BOLD:ACI2381|KC248774  
Grandidierella japonica|GBCMA5652-13|BOLD:ACI2381|KC248773  
Grandidierella japonica|GBCMA5653-13|BOLD:ACI2381|KC248772  
Grandidierella japonica|GBCMA5654-13|BOLD:ACI2381|KC248771  
Grandidierella japonica|GBCMA5659-13|BOLD:ACI2381|KC248766  
Grandidierella japonica|GBCMA5660-13|BOLD:ACI2381|KC248765  
Grandidierella japonica|GBCMA5662-13|BOLD:ACI2381|KC248763  
Grandidierella japonica|GBCMA5663-13|BOLD:ACI2381|KC248762  
Grandidierella japonica|GBCMA5664-13|BOLD:ACI2381|KC248761  
Grandidierella japonica|GBCMA5864-13|BOLD:ACH6536|KC248561  
Grandidierella japonica|GBCMA5865-13|BOLD:ACH6536|KC248560  
Grandidierella japonica|GBCMA5675-13|BOLD:ACH6536|KC248750  
Grandidierella japonica|GBCMA5871-13|BOLD:ACH6536|KC248554  
Grandidierella japonica|GBCMA5859-13|BOLD:ACH6536|KC248566  
Grandidierella japonica|GBCMA5866-13|BOLD:ACH6536|KC248559  
Grandidierella japonica|GBCMA5874-13|BOLD:ACH6536|KC248551  
Grandidierella japonica|GBCMA5774-13|BOLD:ACH6536|KC248651  
Grandidierella japonica|GBCMA5757-13|BOLD:ACH6536|KC248668  
Grandidierella japonica|GBCMA5756-13|BOLD:ACH6536|KC248669  
Grandidierella japonica|GBCMA5752-13|BOLD:ACH6536|KC248673  
Grandidierella japonica|GBCMA5744-13|BOLD:ACH6536|KC248681  
Grandidierella japonica|GBCMA5740-13|BOLD:ACH6536|KC248685  
Grandidierella japonica|GBCMA5728-13|BOLD:ACH6536|KC248697  
Grandidierella japonica|GBCMA5724-13|BOLD:ACH6536|KC248701  
Grandidierella japonica|GBCMA5721-13|BOLD:ACH6536|KC248704  
Grandidierella japonica|GBCMA5714-13|BOLD:ACH6536|KC248711  
Grandidierella japonica|GBCMA5709-13|BOLD:ACH6536|KC248716  
Grandidierella japonica|GBCMA5703-13|BOLD:ACH6536|KC248722  
Grandidierella japonica|GBCMA5702-13|BOLD:ACH6536|KC248723  
Grandidierella japonica|GBCMA5696-13|BOLD:ACH6536|KC248729  
Grandidierella japonica|GBCMA5695-13|BOLD:ACH6536|KC248730  
Grandidierella japonica|GBCMA5710-13|BOLD:ACH6536|KC248715  
Grandidierella japonica|GBCMA5775-13|BOLD:ACH6536|KC248650  
Grandidierella japonica|GBCMA5776-13|BOLD:ACH6536|KC248649  
Grandidierella japonica|GBCMA5785-13|BOLD:ACH6536|KC248640  
Grandidierella japonica|GBCMA5792-13|BOLD:ACH6536|KC248633  
Grandidierella japonica|GBCMA5861-13|BOLD:ACH6536|KC248564  
Grandidierella japonica|GBCMA5655-13|BOLD:ACH6536|KC248770  
Grandidierella japonica|GBCMA5734-13|BOLD:ACH6536|KC248691  
Grandidierella japonica|GBCMA4966-13|United States|BOLD:ACH6536|JX545464  
Grandidierella japonica|GBCMA5722-13|BOLD:ACH6536|KC248703  
Grandidierella japonica|GBCMA5682-13|BOLD:ACH6536|KC248743  
Grandidierella japonica|GBCMA4965-13|United States|BOLD:ACH6536|JX545465  
Grandidierella japonica|GBCMA5817-13|BOLD:ACH6536|KC248608  
Grandidierella japonica|GBCMA5735-13|BOLD:ACH6536|KC248690  
Grandidierella japonica|GBCMA5743-13|BOLD:ACH6536|KC248682  
Grandidierella japonica|GBCMA5760-13|BOLD:ACH6536|KC248665  
Grandidierella japonica|GBCMA5720-13|BOLD:ACH6536|KC248705  
Grandidierella japonica|GBCMA5707-13|BOLD:ACH6536|KC248718  
Grandidierella japonica|GBCMA5604-13|BOLD:ACH6536|KC248821



[illegible]







Paracaprella pusilla|GBCM17396-19|Spain|BOLD:ACQ1205|MK764088  
Paracaprella pusilla|GBCM17399-19|Spain|BOLD:ACQ1205|MK764091  
Paracaprella pusilla|GBCM17402-19|Spain|BOLD:ACQ1205|MK764094  
Paracaprella pusilla|GBCM17404-19|Spain|BOLD:ACQ1205|MK764096  
Paracaprella pusilla|GBCM17405-19|Spain|BOLD:ACQ1205|MK764097  
Paracaprella pusilla|GBCM17408-19|Spain|BOLD:ACQ1205|MK764100  
Paracaprella pusilla|GBCM17412-19|Spain|BOLD:ACQ1205|MK764104  
Paracaprella pusilla|GBCM17413-19|Spain|BOLD:ACQ1205|MK764105  
Paracaprella pusilla|GBCM17415-19|Spain|BOLD:ACQ1205|MK764107  
Paracaprella pusilla|GBCM17428-19|Spain|BOLD:ACQ1205|MK764120  
Paracaprella pusilla|GBCM17433-19|Spain|BOLD:ACQ1205|MK764125  
Paracaprella pusilla|GBCM17434-19|Spain|BOLD:ACQ1205|MK764126  
Paracaprella pusilla|GBCM17436-19|Spain|BOLD:ACQ1205|MK764128  
Paracaprella pusilla|GBCM17438-19|Spain|BOLD:ACQ1205|MK764130  
Paracaprella pusilla|GBCM17439-19|Spain|BOLD:ACQ1205|MK764131  
Paracaprella pusilla|GBCM17440-19|Spain|BOLD:ACQ1205|MK764132  
Paracaprella pusilla|GBCM17441-19|Spain|BOLD:ACQ1205|MK764133  
Paracaprella pusilla|GBCM17442-19|Spain|BOLD:ACQ1205|MK764134  
Paracaprella pusilla|GBCM17443-19|Spain|BOLD:ACQ1205|MK764135  
Paracaprella pusilla|GBCM17444-19|Spain|BOLD:ACQ1205|MK764136  
Paracaprella pusilla|GBCM17445-19|Spain|BOLD:ACQ1205|MK764137  
Paracaprella pusilla|GBCM17446-19|Spain|BOLD:ACQ1205|MK764138  
Paracaprella pusilla|GBCM17447-19|Spain|BOLD:ACQ1205|MK764139  
Paracaprella pusilla|GBCM17449-19|Spain|BOLD:ACQ1205|MK764141  
Paracaprella pusilla|GBCM17450-19|Spain|BOLD:ACQ1205|MK764142  
Paracaprella pusilla|GBCM17455-19|Spain|BOLD:ACQ1205|MK764152  
Paracaprella pusilla|GBCM17458-19|Spain|BOLD:ACQ1205|MK764155  
Paracaprella pusilla|GBCM17464-19|Spain|BOLD:ACQ1205|MK764160  
Paracaprella pusilla|GBCM17352-19|Spain|BOLD:ACQ1205|MK764174  
Paracaprella pusilla|GBCM17453-19|Spain|BOLD:ACQ1205|MK764150  
Paracaprella pusilla|GBCM17356-19|Spain|BOLD:ACQ1205|MK764178  
Paracaprella pusilla|GBCM17363-19|Spain|BOLD:ACQ1205|MK764185  
Paracaprella pusilla|GBCM19360-19|Tunisia|BOLD:ACQ1205|MK764212  
Ampithoe valida|ZPC409-15|United States|BOLD:ACY8137  
Ampithoe valida|VATWO195-14|United States|BOLD:ACM2468|KP254345  
Ampithoe valida|VAFIV133-14|United States|BOLD:ACM2468|KP255056  
Ampithoe valida|VATWO199-14|United States|BOLD:ACM2468|KP254247  
Ampithoe valida|VATWO104-14|United States|BOLD:ACM2468|KP254211  
Ampithoe valida|VATWO019-14|United States|BOLD:ACM2468|KP254641  
Ampithoe valida|SERCI458-14|United States|BOLD:ACM2468|KU905902  
Ampithoe valida|SERCI457-14|United States|BOLD:ACM2468|KU905936  
Ampithoe valida|SERCI456-14|United States|BOLD:ACM2468|KU906082  
Ampithoe valida|VAFIV006-14|United States|BOLD:ACM2468|KP255203  
Ampithoe valida|VAFIV053-14|United States|BOLD:ACM2468|KP254270  
Ampithoe valida|VAFIV153-14|United States|BOLD:ACM2468|KP255250  
Ampithoe valida|VAFIV170-14|United States|BOLD:ACM2468|KP254396  
Ampithoe valida|VAFIV210-14|United States|BOLD:ACM2468|KP254833  
Ampithoe valida|VAFIV217-14|United States|BOLD:ACM2468|KP253999  
Ampithoe valida|GBCMA11842-16|United States|BOLD:ACM2468  
Ampithoe valida|GBCM10562-17|United States|BOLD:ACM2468|KP316306  
Ampithoe valida|GBCMA6257-13|South Korea|BOLD:AAG3718|JX502958  
Ampithoe valida|GBCMA6258-13|South Korea|BOLD:AAG3718|JX502957  
Ampithoe valida|GBCMA6259-13|South Korea|BOLD:AAG3718|JX502956  
Ampithoe valida|GBCMA4971-13|United States|BOLD:AAG3718|JX545459  
Ampithoe valida|BCAMP028-08|Canada|BOLD:AAG3718|MG317869  
Ampithoe valida|BCAMP024-08|Canada|BOLD:AAG3718|MG314486  
Ampithoe valida|BCAMP106-08|Canada|BOLD:AAG3718|MG317126  
Ampithoe valida|GBCMA4972-13|United States|BOLD:AAG3718|JX545458  
Ampithoe valida|GBCMA11844-16|United States|BOLD:AAG3718  
Ampithoe valida|GBCM13028-19|United States|BOLD:AAG3718|KP316308  
Monocorophium acherusicum|FLFIV018-14|United States|BOLD:ACQ7829|KP254906  
Monocorophium acherusicum|FLFIV052-14|United States|BOLD:ACQ7829|KP254424  
Monocorophium acherusicum|MGOTX103-19|United States|BOLD:ADU8691  
Monocorophium acherusicum|MGOTX113-19|United States|BOLD:ADU8691  
Monocorophium acherusicum|VATWO088-14|United States|BOLD:AAU1637|KP254105  
Monocorophium acherusicum|VAFIV177-14|United States|BOLD:AAU1637|KP255339  
Monocorophium acherusicum|ZPC855-20|United States|BOLD:AAU1637  
Monocorophium acherusicum|ZPC410-15|United States|BOLD:AAU1637  
Monocorophium acherusicum|QHAK036-20|Canada|BOLD:AAU1637  
Monocorophium acherusicum|QHAK123-20|Canada|BOLD:AAU1637  
Monocorophium acherusicum|VATWO124-14|United States|BOLD:AAU1637|KP254370  
Monocorophium acherusicum|VAFIV078-14|United States|BOLD:AAU1637|KP254659  
Monocorophium acherusicum|VAFIV047-14|United States|BOLD:AAU1637|KP254365  
Monocorophium acherusicum|VAFIV044-14|United States|BOLD:AAU1637|KP255129  
Corophiidae|AMPAL012-14|Portugal|BOLD:AAU1637|KX224005  
Monocorophium acherusicum|VAFIV024-14|United States|BOLD:AAU1637|KP255249  
Monocorophium acherusicum|VAFIV050-14|United States|BOLD:AAU1637|KP254733  
Monocorophium acherusicum|VAFIV090-14|United States|BOLD:AAU1637|KP254696  
Monocorophium acherusicum|VAFIV136-14|United States|BOLD:AAU1637|KP255085  
Monocorophium acherusicum|VAFIV189-14|United States|BOLD:AAU1637|KP255175  
Monocorophium acherusicum|VAFIV199-14|United States|BOLD:AAU1637|KP254023  
Monocorophium acherusicum|VAFIV215-14|United States|BOLD:AAU1637|KP254245  
Monocorophium acherusicum|QHAK023-20|Canada|BOLD:AAU1637  
Monocorophium acherusicum|BNSC113-10|North Sea|BOLD:AAU1637|KT208818  
Monocorophium acherusicum|BNSC115-10|North Sea|BOLD:AAU1637|KT208724  
Monocorophium acherusicum|ZPC411-15|United States|BOLD:AAU1637  
Monocorophium acherusicum|BNSC116-10|North Sea|BOLD:AAU1637|KT209501  
Monocorophium acherusicum|BNSC114-10|North Sea|BOLD:AAU1637|KT208669  
Monocorophium acherusicum|BNSC117-10|North Sea|BOLD:AAU1637|KT209007  
Monocorophium acherusicum|BNSC118-10|North Sea|BOLD:AAU1637|KT208603  
Monocorophium acherusicum|VAFIV010-14|United States|BOLD:AAU1637|KP254217  
Monocorophium acherusicum|VAFIV168-14|United States|BOLD:AAU1637|KP254467  
Monocorophium acherusicum|VAFIV203-14|United States|BOLD:AAU1637|KP255251  
Monocorophium acherusicum|GBMND84066-21|United States|BOLD:AAU1637|MW703667  
Monocorophium insidiosum|NJCGS383-10|Canada|BOLD:AAE1628|HQ966520  
Monocorophium insidiosum|BNSA232-12|North Sea|BOLD:AAE1628|KT209034  
Monocorophium insidiosum|BNSC041-10|North Sea|BOLD:AAE1628|KT209101  
Monocorophium insidiosum|BNSC042-10|North Sea|BOLD:AAE1628|KT209139  
Monocorophium insidiosum|BNSC040-10|North Sea|BOLD:AAE1628|KT209064  
Monocorophium insidiosum|BNSC039-10|North Sea|BOLD:AAE1628|KT209085  
Monocorophium insidiosum|BNSC038-10|North Sea|BOLD:AAE1628|KT208626  
Monocorophium insidiosum|BNSC036-10|North Sea|BOLD:AAE1628|KT208654

Monocorophium insidiosum|BNSC039-10|North Sea|BOLD:AAE1628|KT209085  
Monocorophium insidiosum|BNSC038-10|North Sea|BOLD:AAE1628|KT208626  
Monocorophium insidiosum|BNSC036-10|North Sea|BOLD:AAE1628|KT208954  
Monocorophium insidiosum|WWGSL206-08|Canada|BOLD:AAE1628  
Monocorophium insidiosum|WWGSL197-08|Canada|BOLD:AAE1628  
Monocorophium insidiosum|WWGSL196-08|Canada|BOLD:AAE1628  
Monocorophium insidiosum|WWGSL193-08|Canada|BOLD:AAE1628  
Monocorophium insidiosum|WWGSL191-08|Canada|BOLD:AAE1628  
Monocorophium insidiosum|NJCGS882-11|Canada|BOLD:AAE1628|MG936189  
Monocorophium insidiosum|BBAY024-12|Canada|BOLD:AAE1628|MG318625  
Monocorophium insidiosum|BBAY025-12|Canada|BOLD:AAE1628|MG315700  
Monocorophium insidiosum|BBAY026-12|Canada|BOLD:AAE1628|MG319313  
Amphipoda|GBCM14392-19|United States|BOLD:AAE1628|MH231165  
Monocorophium insidiosum|NJCGS385-10|Canada|BOLD:AAE1628|HQ966522  
Monocorophium insidiosum|BCAMP030-08|Canada|BOLD:AAE1628|MG310677  
Monocorophium insidiosum|GBCM14884-19|United States|BOLD:AAE1628|MH347468  
Amphipoda|GBCM14390-19|United States|BOLD:AAE9749|MH138327  
Monocorophium insidiosum|BNSC043-10|North Sea|BOLD:AAE9749|KT209031  
Monocorophium insidiosum|NJCGS382-10|Canada|BOLD:AAE9749|HQ966519  
Monocorophium insidiosum|NJCGS406-10|Canada|BOLD:AAE9749|HQ966533  
Monocorophium insidiosum|WWGSL192-08|Canada|BOLD:AAE9749  
Monocorophium insidiosum|BNSC037-10|North Sea|BOLD:AAE9749|KT209419  
Monocorophium insidiosum|NJCGS883-11|Canada|BOLD:AAE9749|MG936088  
Monocorophium insidiosum|ECCRU019-10|Canada|BOLD:AAE9749|HM900380  
Monocorophium insidiosum|NJCGS381-10|Canada|BOLD:AAE9749|HQ966518  
Monocorophium insidiosum|NJCGS384-10|Canada|BOLD:AAE9749|HQ966521  
Monocorophium insidiosum|BBAY027-12|Canada|BOLD:AAE9749|MG310516  
Monocorophium insidiosum|BBAY019-12|Canada|BOLD:AAE9749|MG313882  
Monocorophium insidiosum|ECCRU021-10|Canada|BOLD:AAE9749|HM900382  
Monocorophium insidiosum|ECCRU020-10|Canada|BOLD:AAE9749|HM900381  
Monocorophium insidiosum|WWGSL205-08|Canada|BOLD:AAE9749  
Monocorophium insidiosum|WWGSL195-08|Canada|BOLD:AAE9749  
Monocorophium insidiosum|WWGSL194-08|Canada|BOLD:AAE9749  
Amphipoda|GBCM14391-19|United States|BOLD:AAE9749|MH138328  
Corophiidae|GBCM14401-19|United States|BOLD:AAE9749|MH231164  
Monocorophium insidiosum|GBCM13010-19|Spain|BOLD:AAE9749|KU697731  
Monocorophium insidiosum|ZPC127-14|United States|BOLD:AAE9749  
Monocorophium insidiosum|BBAY023-12|Canada|BOLD:AAE9749|MG320366  
Monocorophium insidiosum|GBMND84067-21|United States|BOLD:AAE9749|MW703669  
Gammarus tigrinus|GBCMA0410-06|BOLD:AAA4304|DQ300215  
Gammarus tigrinus|GBCMA0411-06|BOLD:AAA4304|DQ300216  
Gammarus tigrinus|GBCMA0409-06|BOLD:AAA4304|DQ300214  
Gammarus tigrinus|GBCMA0412-06|BOLD:AAA4304|DQ300217  
Gammarus tigrinus|GBCMA0427-06|BOLD:AAA4305|DQ300232  
Gammarus tigrinus|GBCMA0428-06|BOLD:AAA4306|DQ300233  
Gammarus tigrinus|GBCMA0429-06|BOLD:AAA4306|DQ300234  
Gammarus tigrinus|GBCMA0434-06|BOLD:AAA4306|DQ300239  
Gammarus tigrinus|GBCMA0437-06|BOLD:AAA4306|DQ300242  
Gammarus tigrinus|GBCMA0435-06|BOLD:AAA4306|DQ300240  
Gammarus tigrinus|GBCMA0436-06|BOLD:AAA4306|DQ300241  
Gammarus tigrinus|GBCMA0438-06|BOLD:AAA4306|DQ300243  
Gammarus tigrinus|GBCMA0439-06|BOLD:AAA4306|DQ300244  
Gammarus tigrinus|GBCMA0432-06|BOLD:ADP7774|DQ300237  
Gammarus tigrinus|WW780-08|Canada|BOLD:ADP7774|FJ581683  
Gammarus tigrinus|WW781-08|Canada|BOLD:ADP7774|FJ581682  
Gammarus tigrinus|WW1012-08|Canada|BOLD:ADP7774|FJ581681  
Gammarus tigrinus|WW1013-08|Canada|BOLD:ADP7774|FJ581680  
Gammarus tigrinus|WWGSL253-08|Canada|BOLD:ADP7774|FJ581679  
Gammarus tigrinus|GBCMA0404-06|BOLD:ADP7774|DQ300209  
Gammarus tigrinus|GBCMA0403-06|BOLD:ADP7774|DQ300208  
Gammarus tigrinus|GBCMA0405-06|BOLD:ADP7774|DQ300210  
Gammarus tigrinus|GBCMA0430-06|BOLD:ADP7774|DQ300235  
Gammarus tigrinus|GBCMA0442-06|BOLD:ADP7774|DQ300247  
Gammarus tigrinus|GBCMA0440-06|BOLD:ADP7774|DQ300245  
Gammarus tigrinus|GBCMA0441-06|BOLD:ADP7774|DQ300246  
Gammarus tigrinus|GBCMA0443-06|BOLD:ADP7774|DQ300248  
Gammarus tigrinus|GBCMA0444-06|BOLD:ADP7774|DQ300249  
Gammarus tigrinus|GBCMA0445-06|BOLD:ADP7774|DQ300250  
Gammarus tigrinus|GBCMA0446-06|BOLD:ADP7774|DQ300251  
Gammarus tigrinus|TIGPL005-18|Denmark|BOLD:ADP7774|MK403734  
Gammarus tigrinus|TIGPL002-18|Denmark|BOLD:ADP7774|MK403733  
Gammarus tigrinus|GBCMA0431-06|BOLD:ADP7774|DQ300236  
Gammarus tigrinus|CCNUN413-07|Poland|BOLD:ADP7774  
Gammarus tigrinus|CCNUN412-07|Poland|BOLD:ADP7774  
Gammarus tigrinus|GBCM8017-17|Germany|BOLD:ADP7774|KT075219  
Gammarus tigrinus|GBCMA11034-16|BOLD:ADP7774  
Gammarus tigrinus|WW892-08|Canada|BOLD:ADP7774|FJ581685  
Gammarus tigrinus|CCNUN411-07|Poland|BOLD:ADP7774  
Gammarus tigrinus|CCNUN415-07|Poland|BOLD:ADP7774  
Gammarus tigrinus|GBCMA0433-06|BOLD:ADP7774|DQ300238  
Gammarus tigrinus|GBCM9999-17|Germany|BOLD:ADP7774|KU844999  
Gammarus tigrinus|WWGSL254-08|Canada|BOLD:ADP7774|FJ581678  
Gammarus tigrinus|GBCM11030-17|Germany|BOLD:ADP7774|KU845002  
Gammarus tigrinus|GBCM10288-17|Germany|BOLD:ADP7774|KU845004  
Gammarus tigrinus|GBCM10232-17|Estonia|BOLD:ADP7774|KU845012  
Gammarus tigrinus|GBCM9998-17|Germany|BOLD:ADP7774|KU844995  
Gammarus tigrinus|GBCM9565-17|Germany|BOLD:ADP7774|KU844998  
Gammarus tigrinus|GBCM9334-17|Estonia|BOLD:ADP7774|KU845023  
Gammarus tigrinus|GBCM8849-17|Germany|BOLD:ADP7774|KU844994  
Gammarus tigrinus|GBCM8465-17|Germany|BOLD:ADP7774|KU845006  
Gammarus tigrinus|GBCM8346-17|Germany|BOLD:ADP7774|KU844996  
Gammarus tigrinus|GBCM7909-17|Estonia|BOLD:ADP7774|KU845037  
Gammarus tigrinus|GBCM6769-17|Estonia|BOLD:ADP7774|KU845041  
Gammarus tigrinus|GBCM6543-17|Germany|BOLD:ADP7774|KU845000  
Gammarus tigrinus|GBCM6299-17|Germany|BOLD:ADP7774|KU845003  
Gammarus tigrinus|GBCM6157-17|Estonia|BOLD:ADP7774|KU845040  
Gammarus tigrinus|GBCM6153-17|Estonia|BOLD:ADP7774|KU845026  
Gammarus tigrinus|GBCM6047-17|Germany|BOLD:ADP7774|KU845005  
Gammarus tigrinus|GBCM0407-06|BOLD:ADP7774|DQ300212  
Gammarus tigrinus|GBCM10228-17|Estonia|BOLD:ADP7774|KU845030  
Gammarus tigrinus|GBCM7504-17|Estonia|BOLD:ADP7774|KU845015

Gammarus tigrinus|GBCMA040-1-06||BOLD:ADP7774|KU8450212  
Gammarus tigrinus|GBCM10228-17|Estonia|BOLD:ADP7774|KU845030  
Gammarus tigrinus|GBCM7504-17|Estonia|BOLD:ADP7774|KU845015  
Gammarus tigrinus|GBCM10722-17|Estonia|BOLD:ADP7774|KU845024  
Gammarus tigrinus|GBCM10831-17||BOLD:ADP7774|MF188008  
Gammarus tigrinus|GBCM9448-17||BOLD:ADP7774|MF188001  
Gammarus tigrinus|GBCM9298-17||BOLD:ADP7774|MF188005  
Gammarus tigrinus|GBCM11160-17|Estonia|BOLD:ADP7774|KU845027  
Gammarus tigrinus|GBCM11328-17|Germany|BOLD:ADP7774|KU845001  
Gammarus tigrinus|GBCM11785-19|Germany|BOLD:ADP7774|KU844997  
Gammarus tigrinus|GBCM11787-19|Estonia|BOLD:ADP7774|KU845010  
Gammarus tigrinus|GBCM11790-19|Estonia|BOLD:ADP7774|KU845029  
Gammarus tigrinus|GBCMA1789-09||BOLD:ADP7773|DQ523194  
Gammarus tigrinus|GBCMA630-07||BOLD:ADP7773|DQ523190  
Gammarus tigrinus|GBCMA0416-06||BOLD:ADP7773|DQ300221  
Gammarus tigrinus|GBCMA0424-06||BOLD:ADP7773|DQ300229  
Gammarus tigrinus|GBCMA0423-06||BOLD:ADP7773|DQ300228  
Gammarus tigrinus|GBCMA0426-06||BOLD:ADP7773|DQ300231  
Gammarus tigrinus|GBCMA628-07||BOLD:ADP7773|DQ523192  
Gammarus tigrinus|GBCMA0420-06||BOLD:ADP7773|DQ300225  
Gammarus tigrinus|GBCMA629-07||BOLD:ADP7773|DQ523191  
Gammarus tigrinus|GBCMA0421-06||BOLD:ADP7773|DQ300226  
Gammarus tigrinus|GBCMA0425-06||BOLD:ADP7773|DQ300230  
Gammarus tigrinus|GBCMA632-07||BOLD:ADP7773|DQ523188  
Gammarus tigrinus|GBCMA633-07||BOLD:ADP7773|DQ523187  
Gammarus tigrinus|GBCMA634-07||BOLD:ADP7773|DQ523186  
Gammarus tigrinus|GBCMA627-07||BOLD:ADP7773|DQ523193  
Gammarus tigrinus|GBCMA631-07||BOLD:ADP7773|DQ523189  
Gammarus tigrinus|GBCMA1788-09||BOLD:ADP7773|DQ523195  
Gammarus tigrinus|GBCMA635-07||BOLD:ADP7773|DQ523185  
Gammarus tigrinus|GBCMA636-07||BOLD:ADP7773|DQ523184  
Gammarus tigrinus|GBCMA638-07||BOLD:ADP7773|DQ523182  
Gammarus tigrinus|GBCMA0408-06||BOLD:ADP7773|DQ300213  
Gammarus tigrinus|GBCMA0406-06||BOLD:ADP7773|DQ300211  
Gammarus tigrinus|WW893-08|Canada|BOLD:ADP7773|FJ581684  
Gammarus tigrinus|WWGSL152-08|Canada|BOLD:ADP7773|FJ581690  
Gammarus tigrinus|WWGSL153-08|Canada|BOLD:ADP7773|FJ581689  
Gammarus tigrinus|WWGSL154-08|Canada|BOLD:ADP7773|FJ581688  
Gammarus tigrinus|WWGSL155-08|Canada|BOLD:ADP7773|FJ581687  
Gammarus tigrinus|WWGSL156-08|Canada|BOLD:ADP7773|FJ581686  
Gammarus tigrinus|GBCMA1790-09||BOLD:ADP7773|DQ523179  
Gammarus tigrinus|SERC1220-14|United States|BOLD:AAA4302|KU905729  
Gammarus tigrinus|GBCMA0414-06||BOLD:AAA4302|DQ300219  
Gammarus tigrinus|GBCMA0413-06||BOLD:AAA4302|DQ300218  
Gammarus tigrinus|GBCMA639-07||BOLD:AAA4302|DQ523181  
Gammarus tigrinus|SERC1223-14|United States|BOLD:AAA4302|KU905952  
Gammarus tigrinus|GBCMA0415-06||BOLD:AAA4302|DQ300220  
Gammarus tigrinus|GBCMA640-07||BOLD:AAA4302|DQ523180  
Gammarus tigrinus|SERC1222-14|United States|BOLD:AAA4302|KU905742  
Gammarus tigrinus|GBCMA0419-06||BOLD:AAA4302|DQ300224  
Gammarus tigrinus|GBCMA0422-06||BOLD:AAA4302|DQ300227  
Gammarus tigrinus|GBCMA11033-16||BOLD:AAA4302  
Gammarus tigrinus|GBCM10186-17|Germany|BOLD:AAA4302|KT075218  
Gammarus tigrinus|GBCM10215-17|Estonia|BOLD:AAA4302|KU845034  
Gammarus tigrinus|GBCM7613-17|Estonia|BOLD:AAA4302|KU845039  
Gammarus tigrinus|FCGA084-05|Poland|BOLD:AAA4302|GQ341858  
Gammarus tigrinus|GBCMA1209-08|Netherlands|BOLD:AAA4302|EF570348  
Gammarus tigrinus|GBCMA1792-09||BOLD:AAA4302|DQ523177  
Gammarus tigrinus|GBCM7239-17|Estonia|BOLD:AAA4302|KU845050  
Gammarus tigrinus|FCGA081-05|Poland|BOLD:AAA4302|GQ341859  
Gammarus tigrinus|GBCMA11032-16||BOLD:AAA4302  
Gammarus tigrinus|GBCM9333-17|Estonia|BOLD:AAA4302|KU845020  
Gammarus tigrinus|GBCM5679-17|Estonia|BOLD:AAA4302|KU845014  
Gammarus tigrinus|GBCMA1791-09||BOLD:AAA4302|DQ523178  
Gammarus tigrinus|GBCM11762-19|Estonia|BOLD:AAA4302|KU845016  
Gammarus tigrinus|GBCM11786-19|Estonia|BOLD:AAA4302|KU845009  
Gammarus tigrinus|GBCM11792-19|Estonia|BOLD:AAA4302|KU845036  
Gammarus tigrinus|GBCM13262-19|Germany|BOLD:AAA4302|KT075217  
Gammarus tigrinus|TIGPL004-18|Denmark|BOLD:AAA4302|MK403736  
Gammarus tigrinus|TIGPL001-18|Denmark|BOLD:AAA4302|MK403735  
Gammarus tigrinus|GBCMA0418-06||BOLD:AAA4302|DQ300223  
Gammarus tigrinus|GBCMA637-07||BOLD:AAA4302|DQ523183  
Gammarus tigrinus|GBCM8415-17|Germany|BOLD:AAA4302|KT075216  
Gammarus tigrinus|GBCMA11031-16||BOLD:AAA4302  
Gammarus tigrinus|GBCM10289-17|Estonia|BOLD:AAA4302|KU845011  
Gammarus tigrinus|GBCM9167-17|Estonia|BOLD:AAA4302|KU845018  
Gammarus tigrinus|GBCMA11030-16||BOLD:AAA4302  
Gammarus tigrinus|GBCM10987-17|Germany|BOLD:AAA4302|KT075215  
Gammarus tigrinus|GBCM7612-17|Estonia|BOLD:AAA4302|KU845035  
Gammarus tigrinus|GBCM6419-17|Estonia|BOLD:AAA4302|KU845046  
Gammarus tigrinus|GBCMA0417-06||BOLD:AAA4302|DQ300222  
Gammarus tigrinus|SERC1221-14|United States|BOLD:AAA4302|KU905737  
Gammarus tigrinus|GBCM8591-17|Estonia|BOLD:AAA4302|KU845049  
Gammarus tigrinus|GBCM9164-17|Estonia|BOLD:AAA4302|KU845038  
Gammarus tigrinus|GBCM6034-17|Estonia|BOLD:AAA4302|KU845021  
Gammarus tigrinus|GBCM6233-17||BOLD:AAA4302|MF188003  
Gammarus tigrinus|GBCM7321-17||BOLD:AAA4302|MF188000  
Gammarus tigrinus|GBCM7413-17||BOLD:AAA4302|MF188006  
Gammarus tigrinus|GBCM8260-17||BOLD:AAA4302|MF188004  
Gammarus tigrinus|GBCM8793-17||BOLD:AAA4302|MF188007  
Gammarus tigrinus|GBCM10879-17||BOLD:AAA4302|MF188002  
Gammarus tigrinus|GBCM11763-19|Estonia|BOLD:AAA4302|KU845025  
Gammarus tigrinus|GBCM11788-19|Estonia|BOLD:AAA4302|KU845017  
Gammarus tigrinus|GBCM11789-19|Estonia|BOLD:AAA4302|KU845019  
Gammarus tigrinus|GBCM9017-17|Estonia|BOLD:AAA4302|KU845042  
Gammarus tigrinus|GBCM11031-17|Estonia|BOLD:AAA4302|KU845043  
Gammarus tigrinus|GBCM11791-19|Estonia|BOLD:AAA4302|KU845033  
Gammarus tigrinus|FCGA082-05|Poland|BOLD:AAA4302|GQ341860  
Gammarus tigrinus|FCGA083-05|Poland|BOLD:AAA4302|GQ341861  
Gammarus tigrinus|GBCMA11035-16||BOLD:AAA4302  
Gammarus tigrinus|GBCM13304-19|Germany|BOLD:AAA4302|KT075220  
rGmelinoides fasciatus|GBCMA3523-12||BOLD:ACB4278|FJ15858

Gammarus tigrinus|GBCMA11035-16|BOLD:AAA4302  
Gammarus tigrinus|GBCM13304-19|Germany|BOLD:AAA4302|KT075220  
Gmelinoides fasciatus|GBCMA3523-12|BOLD:ACB4278|FJ715858  
Gmelinoides fasciatus|GBCMA3542-12|BOLD:ACB4278|FJ715877  
Gmelinoides fasciatus|GBCMA3543-12|BOLD:ACB4278|FJ715878  
Gmelinoides fasciatus|GBCMA3545-12|BOLD:ACB4278|FJ715880  
Gmelinoides fasciatus|GBCMA3546-12|BOLD:ACB4278|FJ715881  
Gmelinoides fasciatus|GBCMA3515-12|BOLD:ACE5392|FJ715850  
Gmelinoides fasciatus|GBCMA3516-12|BOLD:ACE5392|FJ715851  
Gmelinoides fasciatus|GBCMA3550-12|BOLD:ACB4275|FJ715888  
Gmelinoides fasciatus|GBCMA3532-12|BOLD:ACE2909|FJ715867  
Gmelinoides fasciatus|GBCMA3533-12|BOLD:ACE2909|FJ715868  
Gmelinoides fasciatus|GBCMA3534-12|BOLD:ACE2909|FJ715869  
Gmelinoides fasciatus|GBCMA3544-12|BOLD:AA1020|FJ715879  
Gmelinoides fasciatus|GBCMA3547-12|BOLD:AA1020|FJ715885  
Gmelinoides fasciatus|GBCMA3548-12|BOLD:AA1020|FJ715886  
Gmelinoides fasciatus|GBCMA3549-12|BOLD:AA1020|FJ715887  
Gmelinoides fasciatus|GBCMA3554-12|BOLD:AA1020|FJ715892  
Gmelinoides fasciatus|GBCMA3555-12|BOLD:AA1020|FJ715893  
Gmelinoides fasciatus|GBCMA3512-12|BOLD:AA1020|FJ715847  
Gmelinoides fasciatus|GBCMA3513-12|BOLD:AA1020|FJ715848  
Gmelinoides fasciatus|GBCMA3514-12|BOLD:AA1020|FJ715849  
Gmelinoides fasciatus|GBCMA3531-12|BOLD:AA1020|FJ715866  
Gmelinoides fasciatus|GBCMA3563-12|BOLD:AA1020|FJ715902  
Gmelinoides fasciatus|GBCMA3562-12|BOLD:AA1020|FJ715901  
Gmelinoides fasciatus|GBCMA3561-12|BOLD:AA1020|FJ715900  
Gmelinoides fasciatus|GBCMA3560-12|BOLD:AA1020|FJ715899  
Gmelinoides fasciatus|GBCMA3559-12|BOLD:AA1020|FJ715898  
Gmelinoides fasciatus|GBCMA3558-12|BOLD:AA1020|FJ715897  
Gmelinoides fasciatus|GBCMA3557-12|BOLD:AA1020|FJ715896  
Gmelinoides fasciatus|GBCMA3556-12|BOLD:AA1020|FJ715895  
Gmelinoides fasciatus|GBCMA2690-10|Russia|BOLD:AA1020|FJ756328  
Gmelinoides fasciatus|GBCM1691-14|Tajikistan|BOLD:AA1020|HF937342  
Gmelinoides fasciatus|GBCM14814-19|BOLD:AA1020|MG214957  
Gmelinoides fasciatus|GBCMA3517-12|BOLD:ACF1897|FJ715852  
Gmelinoides fasciatus|GBCMA3518-12|BOLD:ACF1897|FJ715853  
Gmelinoides fasciatus|GBCMA3519-12|BOLD:ACF1897|FJ715854  
Gmelinoides fasciatus|GBCMA3520-12|BOLD:ACF1897|FJ715855  
Gmelinoides fasciatus|GBCMA3552-12|BOLD:ACE5105|FJ715890  
Gmelinoides fasciatus|GBCMA3535-12|BOLD:ACB5508|FJ715870  
Gmelinoides fasciatus|GBCMA3536-12|BOLD:ACB5508|FJ715871  
Gmelinoides fasciatus|GBCMA3537-12|BOLD:ACB5508|FJ715872  
Gmelinoides fasciatus|GBCMA3538-12|BOLD:ACB5508|FJ715873  
Gmelinoides fasciatus|GBCMA3539-12|BOLD:ACB5508|FJ715874  
Gmelinoides fasciatus|GBCMA3540-12|BOLD:ACB5508|FJ715875  
Gmelinoides fasciatus|GBCMA3541-12|BOLD:ACB5508|FJ715876  
Gmelinoides fasciatus|GBCMA3529-12|BOLD:ACB5508|FJ715864  
Gmelinoides fasciatus|GBCMA3530-12|BOLD:ACB5508|FJ715865  
Gmelinoides fasciatus|GBCMA3525-12|BOLD:ACB5508|FJ715860  
Gmelinoides fasciatus|GBCMA3527-12|BOLD:ACB5508|FJ715862  
Gmelinoides fasciatus|GBCMA3551-12|BOLD:ACB5508|FJ715889  
Gmelinoides fasciatus|GBCMA3553-12|BOLD:ACB5508|FJ715891  
Gmelinoides fasciatus|GBCMA3524-12|BOLD:ACB5508|FJ715859  
Gmelinoides fasciatus|GBCMA3526-12|BOLD:ACB5508|FJ715861  
Gmelinoides fasciatus|GBCMA3528-12|BOLD:ACB5508|FJ715863  
Gmelinoides fasciatus|GBCM14815-19|BOLD:ACB5508|MG214958  
Gmelinoides fasciatus|GBCMA1866-09|Russia|BOLD:ABW2101|AY926675  
Gmelinoides fasciatus|GBCMA3521-12|BOLD:ABW2101|FJ715856  
Gmelinoides fasciatus|GBCMA3522-12|BOLD:ABW2101|FJ715857  
Gmelinoides fasciatus|GBCMA3565-12|BOLD:ABW2101|FJ715904  
Gmelinoides fasciatus|GBCMA3564-12|BOLD:ABW2101|FJ715903  
Gmelinoides fasciatus|GBCMA3510-12|BOLD:ABW2101|FJ715845  
Gmelinoides fasciatus|GBCMA3499-12|BOLD:ABW2101|FJ715834  
Gmelinoides fasciatus|GBCMA3496-12|BOLD:ABW2101|FJ715831  
Gmelinoides fasciatus|GBCMA3494-12|BOLD:ABW2101|FJ715829  
Gmelinoides fasciatus|GBCMA3493-12|BOLD:ABW2101|FJ715828  
Gmelinoides fasciatus|GBCMA3570-12|BOLD:ABW2101|FJ715909  
Gmelinoides fasciatus|GBCMA3579-12|BOLD:ABW2101|FJ715918  
Gmelinoides fasciatus|COAPP121-12|Russia|BOLD:ABW2101  
Gmelinoides fasciatus|COAPP124-12|Russia|BOLD:ABW2101  
Gmelinoides fasciatus|GBCMA3573-12|BOLD:ABW2101|FJ715912  
Gmelinoides fasciatus|GBCMA3574-12|BOLD:ABW2101|FJ715913  
Gmelinoides fasciatus|GBCMA3575-12|BOLD:ABW2101|FJ715914  
Gmelinoides fasciatus|GBCMA3576-12|BOLD:ABW2101|FJ715915  
Gmelinoides fasciatus|GBCMA3577-12|BOLD:ABW2101|FJ715916  
Gmelinoides fasciatus|GBCMA3578-12|BOLD:ABW2101|FJ715917  
Gmelinoides fasciatus|GBCMA3571-12|BOLD:ABW2101|FJ715910  
Gmelinoides fasciatus|GBCMA3572-12|BOLD:ABW2101|FJ715911  
Gmelinoides fasciatus|GBCMA3580-12|BOLD:ABW2101|FJ715919  
Gmelinoides fasciatus|GBCMA3504-12|BOLD:ABW2101|FJ715839  
Gmelinoides fasciatus|GBCMA3508-12|BOLD:ABW2101|FJ715843  
Gmelinoides fasciatus|GBCMA3506-12|BOLD:ABW2101|FJ715841  
Gmelinoides fasciatus|GBCMA3507-12|BOLD:ABW2101|FJ715842  
Gmelinoides fasciatus|GBCMA3509-12|BOLD:ABW2101|FJ715844  
Gmelinoides fasciatus|GBCMA3511-12|BOLD:ABW2101|FJ715846  
Gmelinoides fasciatus|GBCMA3502-12|BOLD:ABW2101|FJ715837  
Gmelinoides fasciatus|GBCMA3505-12|BOLD:ABW2101|FJ715840  
Gmelinoides fasciatus|GBCMA3501-12|BOLD:ABW2101|FJ715836  
Gmelinoides fasciatus|GBCMA3500-12|BOLD:ABW2101|FJ715835  
Gmelinoides fasciatus|GBCMA3498-12|BOLD:ABW2101|FJ715833  
Gmelinoides fasciatus|GBCMA3497-12|BOLD:ABW2101|FJ715832  
Gmelinoides fasciatus|GBCMA3495-12|BOLD:ABW2101|FJ715830  
Gmelinoides fasciatus|GBCMA3492-12|BOLD:ABW2101|FJ715827  
Gmelinoides fasciatus|GBCMA3491-12|BOLD:ABW2101|FJ715826  
Gmelinoides fasciatus|GBCMA3490-12|BOLD:ABW2101|FJ715825  
Gmelinoides fasciatus|GBCMA3489-12|BOLD:ABW2101|FJ715824  
Gmelinoides fasciatus|GBCMA3488-12|BOLD:ABW2101|FJ715823  
Gmelinoides fasciatus|COAPP125-12|Russia|BOLD:ABW2101  
Gmelinoides fasciatus|COAPP123-12|Russia|BOLD:ABW2101  
Gmelinoides fasciatus|COAPP122-12|Russia|BOLD:ABW2101  
Gmelinoides fasciatus|GBCMA3566-12|BOLD:ABW2101|FJ715905  
Gmelinoides fasciatus|GBCMA3567-12|BOLD:ABW2101|FJ715906

Gmelinoides fasciatus|COAPP122-12|Russia|BOLD:ABW2101  
Gmelinoides fasciatus|GBCMA3566-12||BOLD:ABW2101|FJ715905  
Gmelinoides fasciatus|GBCMA3567-12||BOLD:ABW2101|FJ715906  
Gmelinoides fasciatus|GBCMA3568-12||BOLD:ABW2101|FJ715907  
Gmelinoides fasciatus|GBCMA3569-12||BOLD:ABW2101|FJ715908  
Gmelinoides fasciatus|GBCMA3503-12||BOLD:ABW2101|FJ715838  
Gmelinoides fasciatus|GBCMA12806-16|Russia|BOLD:ABW2101  
Gmelinoides fasciatus|GBMNA12544-19|Russia|BOLD:ABW2101|KX341966  
Gmelinoides fasciatus|GBCMA14816-19|Russia|BOLD:ABW2101|NC\_033361  
Echinogammarus ischnus|GBCMA0092-06||BOLD:AAB7819|AY326125  
Echinogammarus ischnus|GBCMA0093-06||BOLD:AAB7819|AY326126  
Echinogammarus ischnus|GBCMA0091-06||BOLD:AAB7818|AY326124  
Chaetogammarus ischnus|TRCBG1964-20|Ukraine|BOLD:AAB7818|Pending (#8286)  
Chaetogammarus ischnus|DCCPC019-22|Romania|BOLD:AAB7818|Pending (#8286)  
Echinogammarus ischnus|EINVA119-19|United States|BOLD:AAB7817  
Echinogammarus ischnus|EINVA117-19|United States|BOLD:AAB7817  
Chaetogammarus ischnus|TRCBG1807-20|Ukraine|BOLD:AAB7817|Pending (#8286)  
Echinogammarus ischnus|GBCMA0082-06||BOLD:AAB7817|AY326115  
Echinogammarus ischnus|RBGC033-03||BOLD:AAB7817|DQ889147  
Echinogammarus ischnus|TLAMP468-17|Belarus|BOLD:AAB7817|MF629716  
Echinogammarus ischnus|TLAMP426-17|Belarus|BOLD:AAB7817|MF629712  
Echinogammarus ischnus|TLAMP421-17|Belarus|BOLD:AAB7817|MF629707  
Echinogammarus ischnus|TLAMP419-17|Belarus|BOLD:AAB7817|MF629705  
Echinogammarus ischnus|TLAMP415-17|Belarus|BOLD:AAB7817|MF629701  
Echinogammarus ischnus|TLAMP414-17|Belarus|BOLD:AAB7817|MF629700  
Echinogammarus ischnus|WW1072-08|Canada|BOLD:AAB7817|FJ581622  
Echinogammarus ischnus|WW1071-08|Canada|BOLD:AAB7817|FJ581623  
Echinogammarus ischnus|WW898-08|Canada|BOLD:AAB7817|FJ581620  
Echinogammarus ischnus|WW895-08|Canada|BOLD:AAB7817|FJ581621  
Echinogammarus ischnus|TLAMP004-15|Belarus|BOLD:AAB7817|MF629680  
Echinogammarus ischnus|EINVA116-19|United States|BOLD:AAB7817  
Echinogammarus ischnus|EINVA115-19|United States|BOLD:AAB7817  
Echinogammarus ischnus|EINVA114-19|United States|BOLD:AAB7817  
Echinogammarus ischnus|EINVA113-19|United States|BOLD:AAB7817  
Echinogammarus ischnus|EINVA118-19|United States|BOLD:AAB7817  
Echinogammarus ischnus|EINVA120-19|United States|BOLD:AAB7817  
Echinogammarus ischnus|CWBPA00-20|United States|BOLD:AAB7817  
Chaetogammarus ischnus|TRCBG1995-20|Ukraine|BOLD:AAB7817|Pending (#8286)  
Echinogammarus ischnus|GBCMA0084-06||BOLD:AAB7817|AY326117  
Echinogammarus ischnus|TLAMP416-17|Belarus|BOLD:AAB7817|MF629702  
Echinogammarus ischnus|GBCMA0085-06||BOLD:AAB7817|AY326118  
Echinogammarus ischnus|GBCMA0083-06||BOLD:AAB7817|AY326116  
Echinogammarus ischnus|GBCMA0086-06||BOLD:AAB7817|AY326119  
Echinogammarus ischnus|TLAMP417-17|Belarus|BOLD:AAB7817|MF629703  
Echinogammarus ischnus|TLAMP418-17|Belarus|BOLD:AAB7817|MF629704  
Echinogammarus ischnus|TLAMP420-17|Belarus|BOLD:AAB7817|MF629706  
Echinogammarus ischnus|TLAMP422-17|Belarus|BOLD:AAB7817|MF629708  
Chaetogammarus ischnus|TRCBG1940-20|Ukraine|BOLD:AAB7817|Pending (#8286)  
Echinogammarus ischnus|GBCMA0088-06||BOLD:AAB7817|AY326121  
Echinogammarus ischnus|GBCMA0087-06||BOLD:AAB7817|AY326120  
Chaetogammarus ischnus|DCCPC018-22|Romania|BOLD:AAB7817|Pending (#8286)  
Echinogammarus ischnus|GBMNB51487-20|Ukraine|BOLD:ADF4395|MK159952  
Echinogammarus ischnus|GBCMA0090-06||BOLD:ADF4395|AY326123  
Echinogammarus ischnus|TLAMP254-17|Belarus|BOLD:ADF4395|MF629699  
Chaetogammarus ischnus|TRCBG1809-20|Ukraine|BOLD:ADF4395|Pending (#8286)  
Echinogammarus ischnus|TLAMP252-17|Belarus|BOLD:ADF4395|MF629697  
Echinogammarus ischnus|TLAMP253-17|Belarus|BOLD:ADF4395|MF629698  
Chaetogammarus ischnus|TRCBG1811-20|Ukraine|BOLD:ADF4395|Pending (#8286)  
Echinogammarus ischnus|TLAMP251-17|Belarus|BOLD:ADF4395|MF629696  
Echinogammarus ischnus|TLAMP250-17|Belarus|BOLD:ADF4395|MF629695  
Echinogammarus ischnus|TLAMP249-17|Belarus|BOLD:ADF4395|MF629694  
Echinogammarus ischnus|TLAMP248-17|Belarus|BOLD:ADF4395|MF629693  
Echinogammarus ischnus|TLAMP247-17|Belarus|BOLD:ADF4395|MF629692  
Echinogammarus ischnus|TLAMP246-17|Belarus|BOLD:ADF4395|MF629691  
Echinogammarus ischnus|TLAMP245-17|Belarus|BOLD:ADF4395|MF629690  
Echinogammarus ischnus|TLAMP244-17|Belarus|BOLD:ADF4395|MF629689  
Echinogammarus ischnus|TLAMP243-17|Belarus|BOLD:ADF4395|MF629688  
Echinogammarus ischnus|TLAMP242-17|Belarus|BOLD:ADF4395|MF629687  
Echinogammarus ischnus|TLAMP241-17|Belarus|BOLD:ADF4395|MF629686  
Echinogammarus ischnus|TLAMP240-17|Belarus|BOLD:ADF4395|MF629685  
Echinogammarus ischnus|TLAMP011-15|Belarus|BOLD:ADF4395|MF629683  
Echinogammarus ischnus|TLAMP007-15|Belarus|BOLD:ADF4395|MF629682  
Chaetogammarus ischnus|TRCBG1853-20|Ukraine|BOLD:ADF4395|Pending (#8286)  
Chaetogammarus ischnus|TRCBG1891-20|Ukraine|BOLD:ADF4395|Pending (#8286)  
Chaetogammarus ischnus|DCCPC020-22|Ukraine|BOLD:ADF4395|Pending (#8286)  
Echinogammarus ischnus|GBCMA0089-06||BOLD:ADF4395|AY326122  
Chaetogammarus ischnus|DCCPC021-22|Ukraine|BOLD:ADF4395|Pending (#8286)  
Neomysis americana|GCGW003-18|Canada|BOLD:AAC2417  
Neomysis americana|GCGW198-18|Canada|BOLD:AAC2417  
Neomysis americana|GCGW194-18|Canada|BOLD:AAC2417  
Neomysis americana|GCGW200-18|Canada|BOLD:AAC2417  
Neomysis americana|GCGW263-18|Canada|BOLD:AAC2417  
Neomysis americana|GCGW264-18|Canada|BOLD:AAC2417  
Neomysis americana|GCGW275-18|Canada|BOLD:AAC2417  
Neomysis americana|GCGW274-18|Canada|BOLD:AAC2417  
Neomysis americana|GCGW272-18|Canada|BOLD:AAC2417  
Neomysis americana|GCGW285-18|Canada|BOLD:AAC2417  
Neomysis americana|GCGW298-18|Canada|BOLD:AAC2417  
Neomysis americana|GCGW303-18|Canada|BOLD:AAC2417  
Neomysis americana|GCGW345-18|Canada|BOLD:AAC2417  
Neomysis americana|GCGW231-18|Canada|BOLD:AAC2417  
Neomysis americana|DSMS067-07||BOLD:AAC2417  
Neomysis americana|GCGW245-18|United States|BOLD:AAC2417  
Neomysis americana|GCGW212-18|Canada|BOLD:AAC2417  
Neomysis americana|WWGSL146-08|Canada|BOLD:AAC2417|FJ581786  
Neomysis americana|WWGSL140-08|Canada|BOLD:AAC2417|FJ581787  
Neomysis americana|WW716-08|Canada|BOLD:AAC2417|FJ581784  
Neomysis americana|GCGW044-18|Canada|BOLD:AAC2417  
Neomysis americana|GCGW131-18|Canada|BOLD:AAC2417  
Neomysis americana|GCGW191-18|Canada|BOLD:AAC2417  
Neomysis americana|GCGW210-18|Canada|BOLD:AAC2417











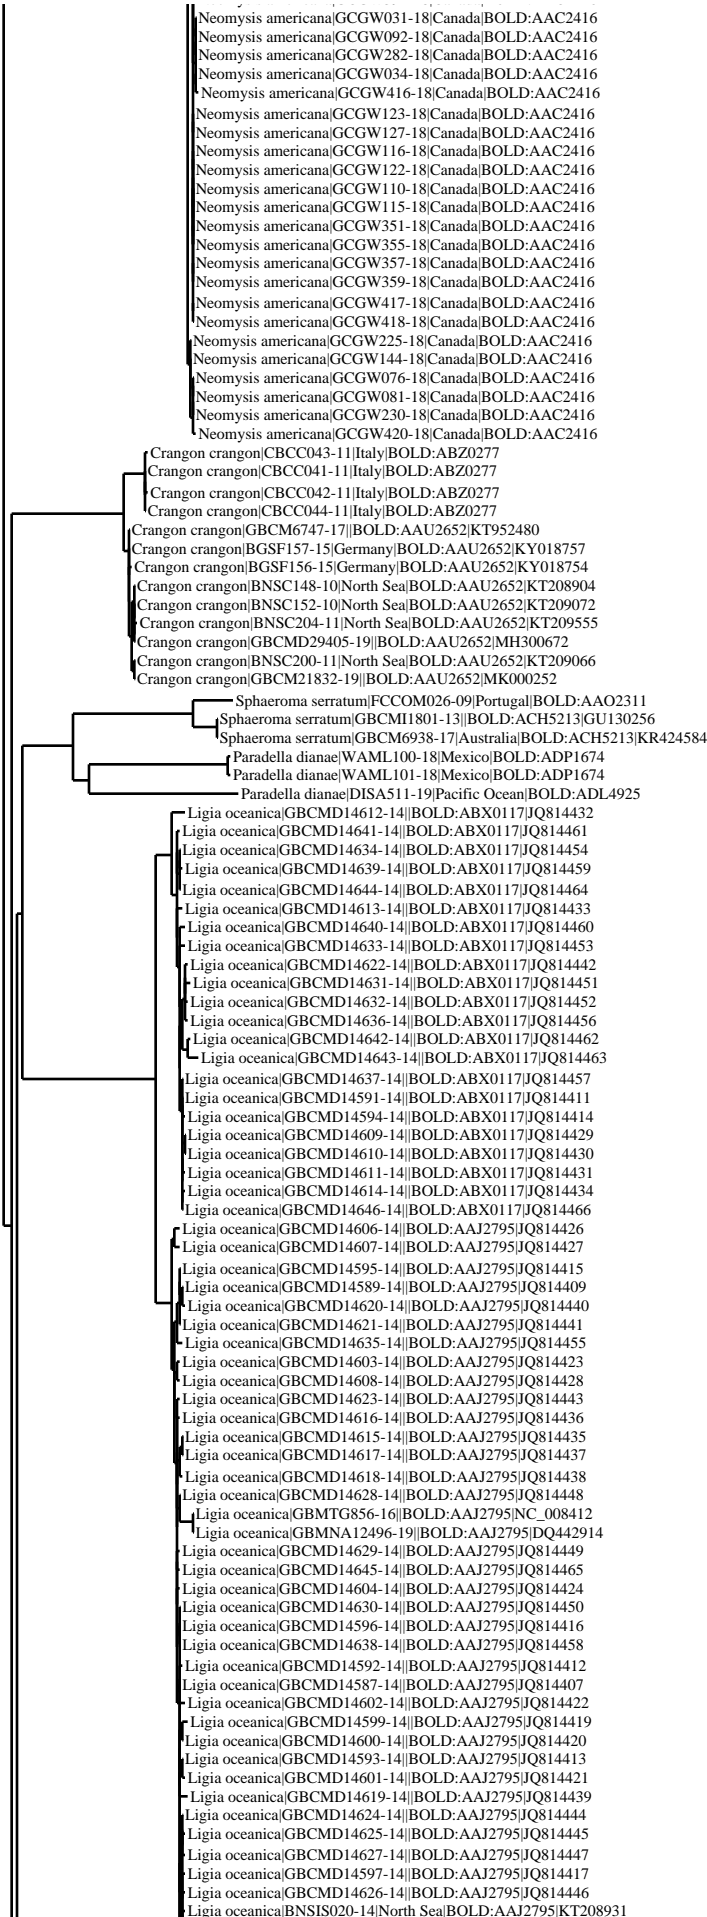

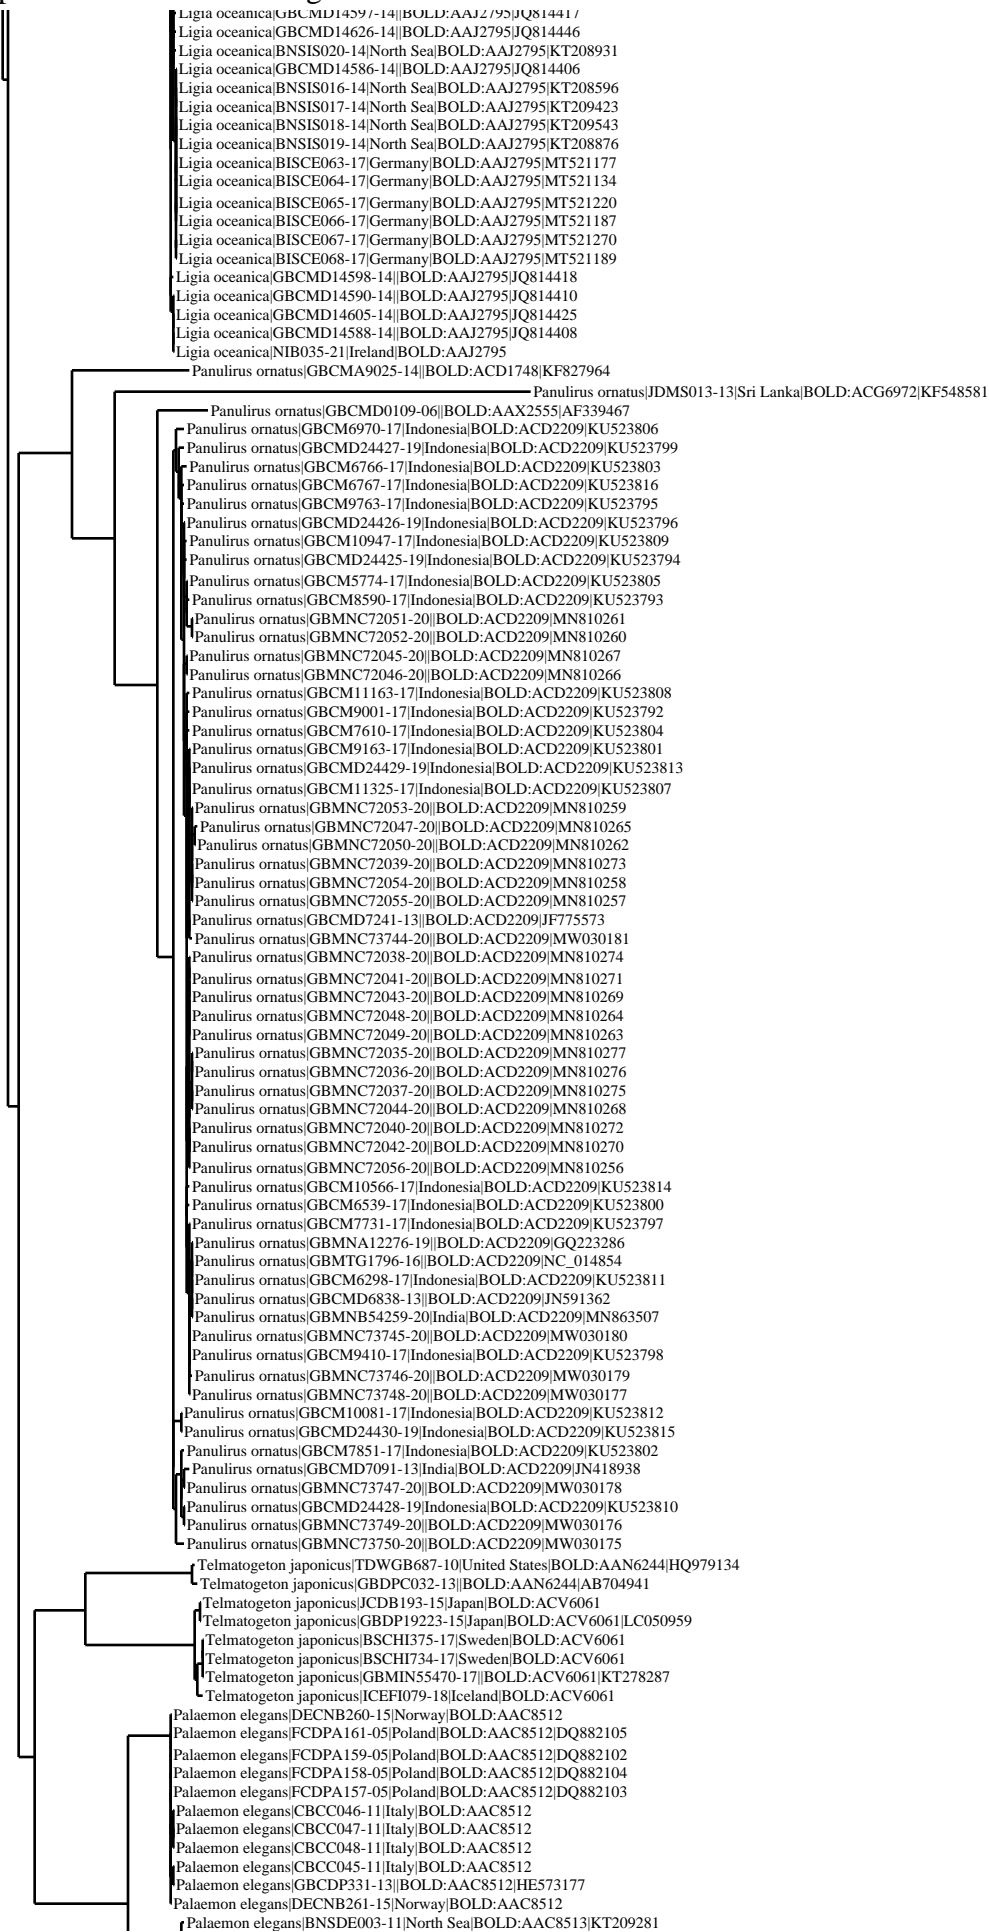

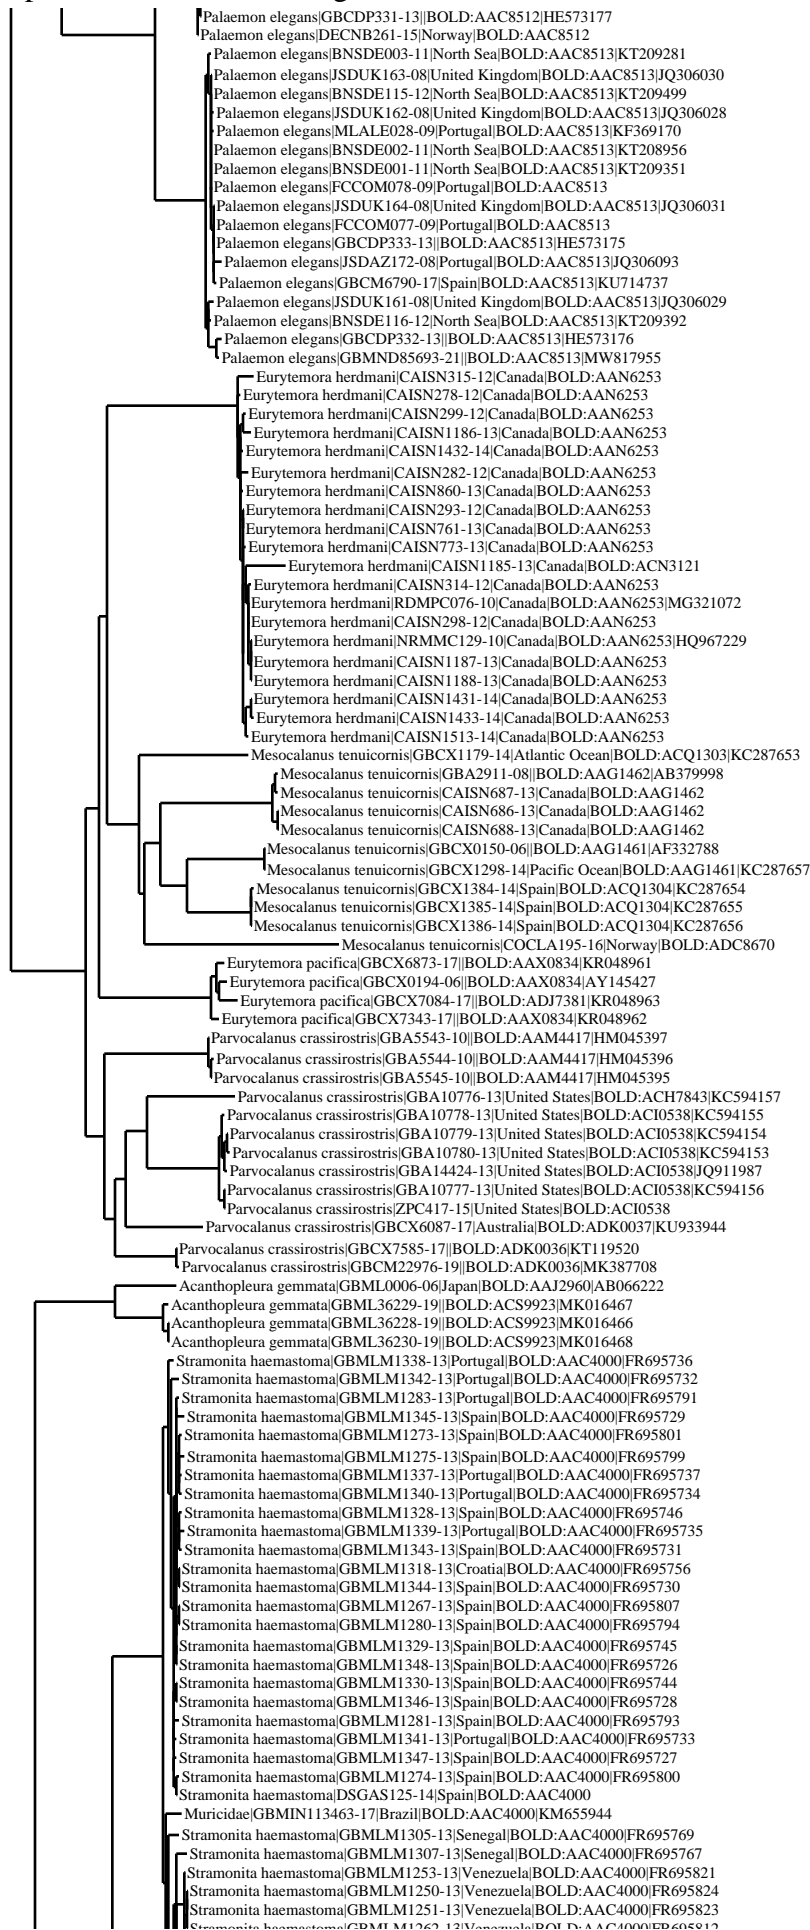

Stramonita haemastoma|GBMLM1250-13|Venezuela|BOLD: AAC4000|FR695824  
Stramonita haemastoma|GBMLM1251-13|Venezuela|BOLD: AAC4000|FR695823  
Stramonita haemastoma|GBMLM1262-13|Venezuela|BOLD: AAC4000|FR695812  
Stramonita haemastoma|GBMLM1252-13|Venezuela|BOLD: AAC4000|FR695822  
Stramonita haemastoma|GBMLM1263-13|Venezuela|BOLD: AAC4000|FR695811  
Stramonita haemastoma|GBMLM1312-13|Senegal|BOLD: AAC4000|FR695762  
Stramonita haemastoma|GBMLM1308-13|Senegal|BOLD: AAC4000|FR695766  
Stramonita haemastoma|GBMLM1313-13|Senegal|BOLD: AAC4000|FR695761  
Stramonita haemastoma|GBMLM1282-13|Croatia|BOLD: AAC4000|FR695792  
Stramonita haemastoma|GBMLM1316-13|Senegal|BOLD: AAC4000|FR695758  
Stramonita haemastoma|GBMLM1317-13|Croatia|BOLD: AAC4000|FR695757  
Stramonita haemastoma|GBMLM1309-13|Senegal|BOLD: AAC4000|FR695765  
Muricidae|GBMIN113455-17|Brazil|BOLD: AAC4000|KM655943  
Stramonita haemastoma|GBMLM1304-13|Senegal|BOLD: AAC4000|FR695770  
Stramonita haemastoma|GBMLM1310-13|Senegal|BOLD: AAC4000|FR695764  
Stramonita haemastoma|GBMLM1311-13|Senegal|BOLD: AAC4000|FR695763  
Stramonita haemastoma|GBMLM1314-13|Senegal|BOLD: AAC4000|FR695760  
Muricidae|GBMIN113460-17|Brazil|BOLD: AAC4000|KM655937  
Muricidae|GBMIN113449-17|Brazil|BOLD: AAC4000|KM655936  
Stramonita|GBMLM1259-13|Venezuela|BOLD: AAC4000|FR695815  
Stramonita haemastoma|GBMLM1261-13|Venezuela|BOLD: AAC4000|FR695813  
Stramonita haemastoma|GBMLM1306-13|Senegal|BOLD: AAC4000|FR695768  
Stramonita haemastoma|GBMLM1315-13|Senegal|BOLD: AAC4000|FR695759  
Muricidae|GBMIN113453-17|Brazil|BOLD: AAC4000|KM655935  
Muricidae|GBMIN113456-17|Brazil|BOLD: AAC4000|KM655938  
Muricidae|GBMIN113459-17|Brazil|BOLD: AAC4000|KM655941  
Muricidae|GBMIN113466-17|Brazil|BOLD: AAC4000|KM655940  
Muricidae|GBMIN113467-17|Brazil|BOLD: AAC4000|KM655939  
Muricidae|GBMIN113468-17|Brazil|BOLD: AAC4000|KM655942  
Stramonita|GBMLM1257-13|Venezuela|BOLD: ACH3428|FR695817  
Stramonita|GBMLM1258-13|Venezuela|BOLD: ACH3428|FR695816  
Muricidae|GBMIN113462-17|Brazil|BOLD: ACH3428|KM655952  
Stramonita|GBMLM1256-13|Venezuela|BOLD: ACH3428|FR695818  
Muricidae|GBMIN113464-17|Brazil|BOLD: ACH3428|KM655955  
Stramonita|GBMLM1335-13|Brazil|BOLD: ACH3428|FR695739  
Stramonita|GBMLM1331-13|Brazil|BOLD: ACH3428|FR695743  
Stramonita|GBMLM1332-13|Brazil|BOLD: ACH3428|FR695742  
Stramonita|GBMLM1333-13|Brazil|BOLD: ACH3428|FR695741  
Muricidae|GBMIN113469-17|Brazil|BOLD: ACH3428|KM655958  
Stramonita haemastoma|GBMLM1235-13|Brazil|BOLD: ACH3428|FR695839  
Muricidae|GBMIN113452-17|Brazil|BOLD: ACH3428|KM655946  
Muricidae|GBMIN113450-17|Brazil|BOLD: ACH3428|KM655948  
Muricidae|GBMIN113458-17|Brazil|BOLD: ACH3428|KM655949  
Stramonita|GBMLM1260-13|Venezuela|BOLD: ACH3428|FR695814  
Muricidae|GBMIN113457-17|Brazil|BOLD: ACH3428|KM655953  
Muricidae|GBMIN113454-17|Brazil|BOLD: ACH3428|KM655950  
Muricidae|GBMIN113448-17|Brazil|BOLD: ACH3428|KM655945  
Stramonita|GBMLM1336-13|Brazil|BOLD: ACH3428|FR695738  
Muricidae|GBMIN113451-17|Brazil|BOLD: ACH3428|KM655947  
Stramonita|GBMLM1334-13|Brazil|BOLD: ACH3428|FR695740  
Stramonita|GBMLM1230-13|Brazil|BOLD: ACH3428|FR695844  
Stramonita|GBMLM1228-13|Brazil|BOLD: ACH3428|FR695846  
Stramonita|GBMLM1231-13|Brazil|BOLD: ACH3428|FR695843  
Muricidae|GBMIN113461-17|Brazil|BOLD: ACH3428|KM655951  
Muricidae|GBMIN113465-17|Brazil|BOLD: ACH3428|KM655956  
Muricidae|GBMIN113470-17|Brazil|BOLD: ACH3428|KM655954  
Muricidae|GBMIN113471-17|Brazil|BOLD: ACH3428|KM655957  
Crepidula fornicata|GBMLS0342-06|United States|BOLD: AEG6917|AF353127  
Crepidula fornicata|GBMLS0350-06|United States|BOLD: AEG6917|AF353135  
Crepidula fornicata|GBMLS0359-06|Canada|BOLD: AEG6917|AF353144  
Crepidula fornicata|BFMOL321-11|Canada|BOLD: AEG6917|KF643526  
Crepidula fornicata|GBMLS0349-06|United States|BOLD: AEG6917|AF353134  
Crepidula fornicata|GBMLS0345-06|United States|BOLD: AEG6917|AF353130  
Crepidula fornicata|BFMOL282-11|Canada|BOLD: AEG6917|KF643514  
Crepidula fornicata|GBMLS0346-06|United States|BOLD: AEG6917|AF353131  
Crepidula fornicata|BNAGB089-14|North Sea|BOLD: AEG6917|KR084598  
Crepidula fornicata|FPMAR252-08|United States|BOLD: AEG6917  
Crepidula fornicata|GBMLS0368-06|United States|BOLD: AEG6917|AF353153  
Crepidula fornicata|GBMLS0369-06|United States|BOLD: AEG6917|AF353154  
Crepidula fornicata|GBMLS0347-06|United States|BOLD: AEG6917|AF353132  
Crepidula fornicata|GBMLS0351-06|United States|BOLD: AEG6917|AF353136  
Crepidula fornicata|GBMLS0367-06|United States|BOLD: AEG6917|AF353152  
Crepidula fornicata|GBMLS0365-06|United States|BOLD: AEG6917|AF353150  
Crepidula fornicata|BNSM083-11|Germany|BOLD: AEG6917|KR084691  
Crepidula fornicata|GBMLS0341-06|United States|BOLD: AEG6917|AF353126  
Crepidula fornicata|SWEMA014-15|Sweden|BOLD: AEG6917|MG934931  
Crepidula fornicata|BNAGB683-14|North Sea|BOLD: AEG6917|KR084569  
Crepidula fornicata|BIV075-14|Portugal|BOLD: AEG6917|KU566746  
Crepidula fornicata|BIBOF058-10|Canada|BOLD: AEG6917|HM884254  
Crepidula fornicata|OZIMP090-16|France|BOLD: AEG6917  
Crepidula fornicata|GBMIN102368-17|Spain|BOLD: AAA8797|KU697654  
Crepidula fornicata|GBMLS0353-06|United States|BOLD: AAA8797|AF353138  
Crepidula fornicata|GBMLS0354-06|United States|BOLD: AAA8797|AF353139  
Crepidula fornicata|GBMLS0355-06|United States|BOLD: AAA8797|AF353140  
Crepidula fornicata|GBMLS0356-06|United States|BOLD: AAA8797|AF353141  
Crepidula fornicata|GBMLS0363-06|United States|BOLD: AAA8797|AF353148  
Crepidula fornicata|BIBOF038-10|Canada|BOLD: AAA8797|HM884242  
Crepidula fornicata|BIBOF043-10|Canada|BOLD: AAA8797|HM884247  
Crepidula fornicata|BIBOF048-10|Canada|BOLD: AAA8797|HM884251  
Crepidula fornicata|BIBOF055-10|Canada|BOLD: AAA8797|HM884252  
Crepidula fornicata|SERC1731-14|United States|BOLD: AAA8797|KU906035  
Crepidula fornicata|GBMLS0344-06|United States|BOLD: AAA8797|AF353129  
Crepidula fornicata|GBMLS0352-06|United States|BOLD: AAA8797|AF353137  
Crepidula fornicata|BNSM054-11|North Sea|BOLD: AAA8797|KR084791  
Crepidula fornicata|GBMLS0343-06|United States|BOLD: AAA8797|AF353128  
Crepidula fornicata|GBMLS0361-06|Canada|BOLD: AAA8797|AF353146  
Crepidula fornicata|GBMLS0360-06|Canada|BOLD: AAA8797|AF353145  
Crepidula fornicata|GBMLS0339-06|United States|BOLD: AAA8797|AF353124  
Crepidula fornicata|GBMLS0348-06|United States|BOLD: AAA8797|AF353133  
Crepidula fornicata|GBMLS0358-06|Canada|BOLD: AAA8797|AF353143  
Crepidula fornicata|GBMLS0362-06|Canada|BOLD: AAA8797|AF353147

Crepidula fornicata|GBMLS0358-06|United States|BOLD:AAA8797|AF353133  
Crepidula fornicata|GBMLS0358-06|Canada|BOLD:AAA8797|AF353143  
Crepidula fornicata|GBMLS0362-06|Canada|BOLD:AAA8797|AF353147  
Crepidula fornicata|BFMOL283-11|Canada|BOLD:AAA8797|KF643453  
Crepidula fornicata|BNSM052-11|North Sea|BOLD:AAA8797|KR084815  
Crepidula fornicata|BNSM053-11|North Sea|BOLD:AAA8797|KR084638  
Crepidula fornicata|BNSM084-11|North Sea|BOLD:AAA8797|KR084693  
Crepidula fornicata|SERCI127-12|United States|BOLD:AAA8797|KT959368  
Crepidula fornicata|SERCI690-14|United States|BOLD:AAA8797|KU906061  
Crepidula fornicata|SERCI692-14|United States|BOLD:AAA8797|KU906031  
Crepidula fornicata|SERCI729-14|United States|BOLD:AAA8797|KU905852  
Crepidula fornicata|OZIMP041-15|United Kingdom|BOLD:AAA8797  
Crepidula fornicata|BNSM085-11|North Sea|BOLD:AAA8797|KR084386  
Crepidula fornicata|BFMOL284-11|Canada|BOLD:AAA8797|KF643312  
Crepidula fornicata|BIBOF057-10|Canada|BOLD:AAA8797|HM884253  
Crepidula fornicata|GBMLS0357-06|Canada|BOLD:AAA8797|AF353142  
Crepidula fornicata|GBMLS0340-06|United States|BOLD:AAA8797|AF353125  
Crepidula fornicata|GBMLS0366-06|United States|BOLD:AAA8797|AF353151  
Crepidula fornicata|BNAGB090-14|North Sea|BOLD:AAA8797|KR084800  
Crepidula fornicata|SERCI691-14|United States|BOLD:AAA8797|KU905745  
Crepidula fornicata|GBMLS0364-06|United States|BOLD:AAA8797|AF353149  
Crepidula fornicata|OZIMP089-16|France|BOLD:AAA8797  
Crepidula fornicata|BIBOF060-10|Canada|BOLD:AAA8797|HM884255  
Crepidula fornicata|SERCI730-14|United States|BOLD:AAA8797|KU906101  
Crepidula fornicata|SDP648017-17|United States|BOLD:AAA8797|MG299083  
Crepidula fornicata|PBCB014-17|United States|BOLD:AAA8797  
Crepidula fornicata|SDP864011-19|United States|BOLD:AAA8797|OK415816  
Aporrhais pespelecani|BNAGB088-14|North Sea|BOLD:AAJ1874|KR084735  
Aporrhais pespelecani|GBMLS2469-06|BOLD:AAJ1874|DQ525241  
Aporrhais pespelecani|BNSM043-11|North Sea|BOLD:AAJ1874|KR084824  
Aporrhais pespelecani|GBMLS3015-08|Sweden|BOLD:AAJ1874|EF528304  
Aporrhais pespelecani|SWEMA023-15|Sweden|BOLD:AAJ1874|MG935118  
Aporrhais pespelecani|BNSM040-11|North Sea|BOLD:AAJ1874|KR084761  
Aporrhais pespelecani|BNSM041-11|North Sea|BOLD:AAJ1874|KR084497  
Aporrhais pespelecani|BNSM042-11|North Sea|BOLD:AAJ1874|KR084699  
Aporrhais pespelecani|SWEMA024-15|Sweden|BOLD:AAJ1874|MG935309  
Aporrhais pespelecani|BIM975-21|Israel|BOLD:AEJ3384  
Sabia conica|GBMLS0608-06|BOLD:AAI0990|AF546074  
Sabia conica|GBMLS0610-06|BOLD:AAI0991|AF546076  
Gastropoda|GBML29315-19|Saudi Arabia|BOLD:AAI0991|MH339192  
Gastropoda|GBML29324-19|Saudi Arabia|BOLD:AAI0991|MH339201  
Sabia conica|KANBI1436-19|United States|BOLD:ADW6161  
Sabia conica|GBMND10503-21|United States|BOLD:ADW6161|MW278752  
Sabia conica|KANBI751-19|United States|BOLD:ADW6161  
Sabia conica|GBMND10504-21|United States|BOLD:ADW6161|MW278251  
Hexaplex trunculus|GBMLM1694-14|BOLD:ADR9602|KF297429  
Hexaplex trunculus|GBMLM1678-14|BOLD:ACG9353|KF297413  
Hexaplex trunculus|GBMLM1680-14|BOLD:ACG9353|KF297415  
Hexaplex trunculus|GBMLM1681-14|BOLD:ACG9353|KF297416  
Hexaplex trunculus|GBMLM1677-14|BOLD:ACG9353|KF297412  
Hexaplex trunculus|GBMLM1682-14|BOLD:ACG9353|KF297417  
Hexaplex trunculus|GBMLM1674-14|BOLD:ACG9353|KF297409  
Hexaplex trunculus|GBMLM1693-14|BOLD:ACG9353|KF297428  
Hexaplex trunculus|GBMLM1691-14|BOLD:ACG9353|KF297426  
Hexaplex trunculus|GBMLM1692-14|BOLD:ACG9353|KF297427  
Hexaplex trunculus|GBMLM1695-14|BOLD:ACG9353|KF297430  
Hexaplex trunculus|GBMLM1698-14|BOLD:ACG9353|KF297433  
Hexaplex trunculus|GBMLM1673-14|BOLD:AAK6034|KF297408  
Hexaplex trunculus|GBMLM1685-14|BOLD:AAK6034|KF297420  
Hexaplex trunculus|GBMLM1688-14|BOLD:AAK6034|KF297423  
Hexaplex trunculus|GBMLM1676-14|BOLD:AAK6034|KF297411  
Hexaplex trunculus|GBMLM1683-14|BOLD:AAK6034|KF297418  
Hexaplex trunculus|GBMLM1675-14|BOLD:AAK6034|KF297410  
Hexaplex trunculus|GBMLM1684-14|BOLD:AAK6034|KF297419  
Hexaplex trunculus|GBMLM1672-14|BOLD:AAK6034|KF297407  
Hexaplex trunculus|GBMLM1679-14|BOLD:AAK6034|KF297414  
Hexaplex trunculus|GBMLM1696-14|BOLD:AAK6034|KF297431  
Hexaplex trunculus|GBMLM1686-14|BOLD:AAK6034|KF297421  
Hexaplex trunculus|GBMLM1687-14|BOLD:ACQ2376|KF297422  
Hexaplex trunculus|GBMLM1689-14|BOLD:AAK6034|KF297424  
Hexaplex trunculus|GBMLM1690-14|BOLD:AAK6034|KF297425  
Hexaplex trunculus|GBMLM1697-14|BOLD:AAK6034|KF297432  
Hexaplex trunculus|GBML17734-19|Tunisia|BOLD:ACG9353|KT934243  
Hexaplex trunculus|GBMLG20879-15|Tunisia|BOLD:AAK6034|KJ135242  
Hexaplex trunculus|GBML17728-19|Tunisia|BOLD:AAK6034|KT934237  
Hexaplex trunculus|GBML17736-19|Tunisia|BOLD:AAK6034|KT934245  
Hexaplex trunculus|GBMLG20869-15|France|BOLD:AAK6034|KJ135232  
Hexaplex trunculus|GBMLG20876-15|Tunisia|BOLD:AAK6034|KJ135239  
Hexaplex trunculus|GBMLG20892-15|Tunisia|BOLD:AAK6034|KJ135255  
Hexaplex trunculus|GBMLG20897-15|Tunisia|BOLD:AAK6034|KJ135260  
Hexaplex trunculus|GBMLG20893-15|Tunisia|BOLD:AAK6034|KJ135256  
Hexaplex trunculus|GBMLM575-09|BOLD:AAK6034|EU391577  
Hexaplex trunculus|GBMLG20881-15|Tunisia|BOLD:AAK6034|KJ135244  
Hexaplex trunculus|GBMLG20885-15|Tunisia|BOLD:AAK6034|KJ135248  
Hexaplex trunculus|GBMLG20880-15|Tunisia|BOLD:AAK6034|KJ135243  
Hexaplex trunculus|GBMLG20883-15|Tunisia|BOLD:AAK6034|KJ135246  
Hexaplex trunculus|GBMLG20889-15|Tunisia|BOLD:AAK6034|KJ135252  
Hexaplex trunculus|GBMLG20890-15|Tunisia|BOLD:AAK6034|KJ135253  
Hexaplex trunculus|GBMLG20899-15|Tunisia|BOLD:AAK6034|KJ135262  
Hexaplex trunculus|GBMLG20860-15|Portugal|BOLD:AAK6034|KJ135223  
Hexaplex trunculus|GBMLG20870-15|France|BOLD:AAK6034|KT934235  
Hexaplex trunculus|GBML17726-19|France|BOLD:AAK6034|KT934235  
Hexaplex trunculus|GBMLG20898-15|Tunisia|BOLD:AAK6034|KJ135261  
Hexaplex trunculus|GBML17727-19|France|BOLD:AAK6034|KT934236  
Hexaplex trunculus|GBML17737-19|Tunisia|BOLD:AAK6034|KT934246  
Hexaplex trunculus|GBML17732-19|Tunisia|BOLD:AAK6034|KT934241  
Hexaplex trunculus|GBMLM1404-13|Portugal|BOLD:AAK6034|AM712604  
Hexaplex trunculus|GBMLM1401-13|Portugal|BOLD:AAK6034|AM712607  
Hexaplex trunculus|GBMLG20859-15|Portugal|BOLD:AAK6034|KJ135222  
Hexaplex trunculus|GBMLG20862-15|Morocco|BOLD:AAK6034|KJ135225  
Hexaplex trunculus|GBMLM1402-13|Portugal|BOLD:AAK6034|AM712606  
Hexaplex trunculus|GBMLM1400-13|Portugal|BOLD:AAK6034|AM712608



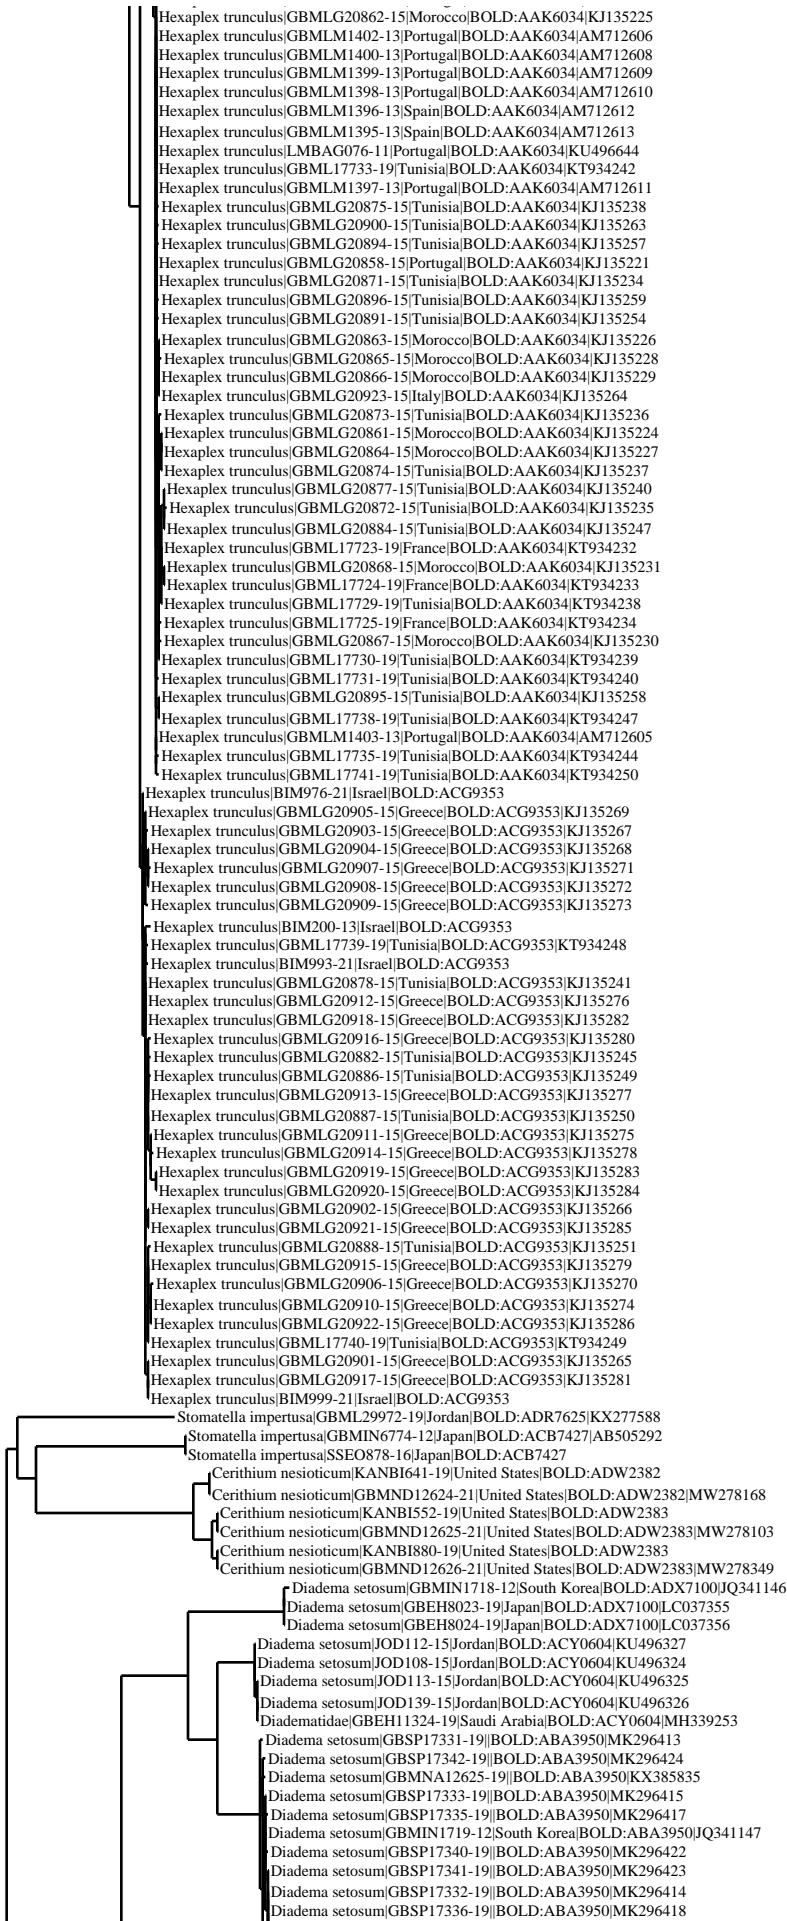

Diadema setosum|GBSP17332-19|BOLD:ABA3950|MK296414  
Diadema setosum|GBSP17336-19|BOLD:ABA3950|MK296418  
Diadema setosum|GBSP17338-19|BOLD:ABA3950|MK296420  
Diadema setosum|GBSP17339-19|BOLD:ABA3950|MK296421  
Diadema setosum|GBSP17344-19|BOLD:ABA3950|MK296426  
Diadema setosum|GBSP17343-19|BOLD:ABA3950|MK296425  
Diadema setosum|GBSP17337-19|BOLD:ABA3950|MK296419  
Diadema setosum|GBSP17334-19|BOLD:ABA3950|MK296416  
Diadema setosum|SIMP076-19|Singapore|BOLD:ABA3950  
Diadema setosum|GBMNC22930-20|Singapore|BOLD:ABA3950|MN690257  
Acanthaster planci|GBEH2667-09|Saudi Arabia|BOLD:AAA1632|FM174658  
Acanthaster planci|GBEH2673-09|Saudi Arabia|BOLD:AAA1632|FM174652  
Acanthaster planci|GBEH2661-09|Saudi Arabia|BOLD:AAA1632|FM174664  
Acanthaster planci|GBEH2664-09|Saudi Arabia|BOLD:AAA1632|FM174661  
Acanthaster planci|GBEH2665-09|Saudi Arabia|BOLD:AAA1632|FM174660  
Acanthaster planci|GBEH2669-09|Saudi Arabia|BOLD:AAA1632|FM174656  
Acanthaster planci|GBEH2671-09|Saudi Arabia|BOLD:AAA1632|FM174654  
Acanthaster planci|GBEH2652-09|Egypt|BOLD:AAA1632|FM174673  
Acanthaster planci|GBEH2655-09|Egypt|BOLD:AAA1632|FM174670  
Acanthaster planci|GBEH2658-09|Egypt|BOLD:AAA1632|FM174667  
Acanthaster planci|GBEH2670-09|Saudi Arabia|BOLD:AAA1632|FM174655  
Acanthaster planci|GBEH2660-09|Egypt|BOLD:AAA1632|FM174665  
Acanthaster planci|GBEH2663-09|Saudi Arabia|BOLD:AAA1632|FM174662  
Acanthaster planci|GBEH2676-09|Saudi Arabia|BOLD:AAA1632|FM174649  
Acanthaster planci|GBEH2675-09|Saudi Arabia|BOLD:AAA1632|FM174650  
Acanthaster planci|GBEH2674-09|Saudi Arabia|BOLD:AAA1632|FM174651  
Acanthaster planci|GBEH2672-09|Saudi Arabia|BOLD:AAA1632|FM174653  
Acanthaster planci|GBEH2668-09|Saudi Arabia|BOLD:AAA1632|FM174657  
Acanthaster planci|GBEH2666-09|Saudi Arabia|BOLD:AAA1632|FM174659  
Acanthaster planci|GBEH2662-09|Saudi Arabia|BOLD:AAA1632|FM174663  
Acanthaster planci|GBEH2659-09|Egypt|BOLD:AAA1632|FM174666  
Acanthaster planci|GBEH2657-09|Egypt|BOLD:AAA1632|FM174668  
Acanthaster planci|GBEH2656-09|Egypt|BOLD:AAA1632|FM174669  
Acanthaster planci|GBEH2654-09|Egypt|BOLD:AAA1632|FM174671  
Acanthaster planci|GBEH2653-09|Egypt|BOLD:AAA1632|FM174672  
Acanthaster planci|GBEH2677-09|Saudi Arabia|BOLD:AAA1632|FM174648  
Acanthaster planci|GBEH2678-09|Saudi Arabia|BOLD:AAA1632|FM174647  
Acanthaster planci|GBEH2679-09|Saudi Arabia|BOLD:AAA1632|FM174646  
Acanthaster planci|GBEH2680-09|Saudi Arabia|BOLD:AAA1632|FM174645  
Acanthaster planci|GBEH2731-09|United Arab Emirates|BOLD:AAA1633|FM174578  
Acanthaster planci|GBEH2726-09|United Arab Emirates|BOLD:AAA1633|FM174583  
Acanthaster planci|GBEH2725-09|Oman|BOLD:AAA1633|FM174584  
Acanthaster planci|GBEH2724-09|Oman|BOLD:AAA1633|FM174585  
Acanthaster planci|GBEH2723-09|Oman|BOLD:AAA1633|FM174586  
Acanthaster planci|GBEH2722-09|Oman|BOLD:AAA1633|FM174587  
Acanthaster planci|GBEH2721-09|Oman|BOLD:AAA1633|FM174588  
Acanthaster planci|GBEH2720-09|Oman|BOLD:AAA1633|FM174589  
Acanthaster planci|GBEH2719-09|Oman|BOLD:AAA1633|FM174590  
Acanthaster planci|GBEH2718-09|Oman|BOLD:AAA1633|FM174591  
Acanthaster planci|GBEH2717-09|Oman|BOLD:AAA1633|FM174592  
Acanthaster planci|GBEH2727-09|United Arab Emirates|BOLD:AAA1633|FM174582  
Acanthaster planci|GBEH2728-09|United Arab Emirates|BOLD:AAA1633|FM174581  
Acanthaster planci|GBEH2729-09|United Arab Emirates|BOLD:AAA1633|FM174580  
Acanthaster planci|GBEH2730-09|United Arab Emirates|BOLD:AAA1633|FM174579  
Acanthaster planci|GBEH2732-09|United Arab Emirates|BOLD:AAA1633|FM174577  
Acanthaster planci|GBEH2733-09|United Arab Emirates|BOLD:AAA1633|FM174576  
Acanthaster planci|GBEH2734-09|United Arab Emirates|BOLD:AAA1633|FM174575  
Acanthaster planci|GBEH2735-09|United Arab Emirates|BOLD:AAA1633|FM174574  
Acanthaster planci|GBEH2736-09|Maldives|BOLD:AAA1633|FM174573  
Acanthaster planci|GBEH2739-09|Maldives|BOLD:AAA1633|FM174570  
Acanthaster planci|GBEH2740-09|Maldives|BOLD:AAA1633|FM174569  
Acanthaster planci|GBEH2745-09|Maldives|BOLD:AAA1633|FM174564  
Acanthaster planci|GBEH2748-09|Maldives|BOLD:AAA1633|FM174561  
Acanthaster planci|GBEH2742-09|Maldives|BOLD:AAA1633|FM174567  
Acanthaster planci|GBEH2743-09|Maldives|BOLD:AAA1633|FM174566  
Acanthaster planci|GBEH2747-09|Maldives|BOLD:AAA1633|FM174562  
Acanthaster planci|GBEH2749-09|Thailand|BOLD:AAA1633|FM174560  
Acanthaster planci|GBEH2751-09|Thailand|BOLD:AAA1633|FM174558  
Acanthaster planci|GBEH2755-09|Thailand|BOLD:AAA1633|FM174554  
Acanthaster planci|GBEH2754-09|Thailand|BOLD:AAA1633|FM174555  
Acanthaster planci|GBEH2753-09|Thailand|BOLD:AAA1633|FM174556  
Acanthaster planci|GBEH2752-09|Thailand|BOLD:AAA1633|FM174557  
Acanthaster planci|GBEH2750-09|Thailand|BOLD:AAA1633|FM174559  
Acanthaster planci|GBEH2746-09|Maldives|BOLD:AAA1633|FM174563  
Acanthaster planci|GBEH2744-09|Maldives|BOLD:AAA1633|FM174565  
Acanthaster planci|GBEH2741-09|Maldives|BOLD:AAA1633|FM174568  
Acanthaster planci|GBEH2738-09|Maldives|BOLD:AAA1633|FM174571  
Acanthaster planci|GBEH2737-09|Maldives|BOLD:AAA1633|FM174572  
Acanthaster planci|GBEH2756-09|Thailand|BOLD:AAA1633|FM174553  
Acanthaster planci|GBEH2757-09|Thailand|BOLD:AAA1633|FM174552  
Acanthaster planci|GBEH2758-09|Thailand|BOLD:AAA1633|FM174551  
Acanthaster planci|GBEH2759-09|Thailand|BOLD:AAA1633|FM174550  
Acanthaster planci|GBEH2760-09|BOLD:AAA1633|FM174549  
Acanthaster planci|GBEH2761-09|BOLD:AAA1633|FM174548  
Acanthaster planci|GBEH2762-09|BOLD:AAA1633|FM174547  
Acanthaster planci|GBEH2763-09|Indonesia|BOLD:AAA1633|FM174546  
Acanthaster planci|GBEH2764-09|Indonesia|BOLD:AAA1633|FM174545  
Acanthaster planci|GBEH2701-09|Kenya|BOLD:AAA1631|FM174608  
Acanthaster planci|GBEH2700-09|Kenya|BOLD:AAA1631|FM174609  
Acanthaster planci|GBEH2714-09|Oman|BOLD:AAA1631|FM174595  
Acanthaster planci|GBEH2697-09|Kenya|BOLD:AAA1631|FM174612  
Acanthaster planci|GBEHA440-13|Indian Ocean|BOLD:AAA1631|HE608513  
Acanthaster planci|GBEH2704-09|Kenya|BOLD:AAA1631|FM174605  
Acanthaster planci|GBEH2705-09|Kenya|BOLD:AAA1631|FM174604  
Acanthaster planci|GBEH2699-09|Kenya|BOLD:AAA1631|FM174610  
Acanthaster planci|GBEH2694-09|Kenya|BOLD:AAA1631|FM174615  
Acanthaster planci|GBEH2629-09|South Africa|BOLD:AAA1631|FM174627  
Acanthaster planci|GBEH2617-09|South Africa|BOLD:AAA1631|FM174623  
Acanthaster planci|GBEH2713-09|Oman|BOLD:AAA1631|FM174596  
Acanthaster planci|GBEH2715-09|United Arab Emirates|BOLD:AAA1631|FM174594  
Acanthaster planci|GBEH2716-09|United Arab Emirates|BOLD:AAA1631|FM174593

Acanthaster planci|GBEH2713-09|Oman|BOLD:AAA1631|FM174596  
Acanthaster planci|GBEH2715-09|United Arab Emirates|BOLD:AAA1631|FM174594  
Acanthaster planci|GBEH2716-09|United Arab Emirates|BOLD:AAA1631|FM174593  
Acanthaster planci|GBEHA442-13|Indian Ocean|BOLD:AAA1631|HE608511  
Acanthaster planci|GBEH2692-09|Kenya|BOLD:AAA1631|FM174617  
Acanthaster planci|GBEH2621-09|Mauritius|BOLD:AAA1631|FM174635  
Acanthaster planci|GBEH2693-09|Kenya|BOLD:AAA1631|FM174616  
Acanthaster planci|GBEH2624-09|BOLD:AAA1631|FM174632  
Acanthaster planci|GBEH2696-09|Kenya|BOLD:AAA1631|FM174613  
Acanthaster planci|GBEH2618-09|South Africa|BOLD:AAA1631|FM174622  
Acanthaster planci|GBEH2614-09|South Africa|BOLD:AAA1631|FM174626  
Acanthaster planci|GBEH2684-09|Australia|BOLD:AAA1631|FM174641  
Acanthaster planci|GBEH2682-09|Australia|BOLD:AAA1631|FM174643  
Acanthaster planci|GBEH2681-09|Australia|BOLD:AAA1631|FM174644  
Acanthaster planci|GBEH2628-09|South Africa|BOLD:AAA1631|FM174628  
Acanthaster planci|GBEH2627-09|BOLD:AAA1631|FM174629  
Acanthaster planci|GBEH2625-09|BOLD:AAA1631|FM174631  
Acanthaster planci|GBEH2623-09|BOLD:AAA1631|FM174633  
Acanthaster planci|GBEH2620-09|Mauritius|BOLD:AAA1631|FM174636  
Acanthaster planci|GBEH2619-09|South Africa|BOLD:AAA1631|FM174621  
Acanthaster planci|GBEH2683-09|Australia|BOLD:AAA1631|FM174642  
Acanthaster planci|GBEH2616-09|South Africa|BOLD:AAA1631|FM174624  
Acanthaster planci|GBEH2622-09|Mauritius|BOLD:AAA1631|FM174634  
Acanthaster planci|GBEH2615-09|South Africa|BOLD:AAA1631|FM174625  
Acanthaster planci|GBEH2626-09|BOLD:AAA1631|FM174630  
Acanthaster planci|GBEH2703-09|Kenya|BOLD:AAA1631|FM174606  
Acanthaster planci|GBEH2689-09|Kenya|BOLD:AAA1631|FM174620  
Acanthaster planci|GBEH2690-09|Kenya|BOLD:AAA1631|FM174619  
Acanthaster planci|GBEH2687-09|Mauritius|BOLD:AAA1631|FM174638  
Acanthaster planci|GBEH2688-09|Mauritius|BOLD:AAA1631|FM174637  
Acanthaster planci|GBEH2685-09|Australia|BOLD:AAA1631|FM174640  
Acanthaster planci|GBEH2686-09|Australia|BOLD:AAA1631|FM174639  
Acanthaster planci|GBEH2691-09|Kenya|BOLD:AAA1631|FM174618  
Acanthaster planci|GBEH2695-09|Kenya|BOLD:AAA1631|FM174614  
Acanthaster planci|GBEH2698-09|Kenya|BOLD:AAA1631|FM174611  
Acanthaster planci|GBEH2702-09|Kenya|BOLD:AAA1631|FM174607  
Acanthaster planci|GBEH2706-09|Kenya|BOLD:AAA1631|FM174603  
Acanthaster planci|GBEH2707-09|Kenya|BOLD:AAA1631|FM174602  
Acanthaster planci|GBEH2708-09|Kenya|BOLD:AAA1631|FM174601  
Acanthaster planci|GBEH2709-09|Kenya|BOLD:AAA1631|FM174600  
Acanthaster planci|GBEH2710-09|Kenya|BOLD:AAA1631|FM174599  
Acanthaster planci|GBEH2711-09|Kenya|BOLD:AAA1631|FM174598  
Acanthaster planci|GBEH2712-09|Kenya|BOLD:AAA1631|FM174597  
Acanthaster planci|GBEHA438-13|Indian Ocean|BOLD:AAA1631|HE608515  
Acanthaster planci|GBEHA439-13|Indian Ocean|BOLD:AAA1631|HE608514  
Acanthaster planci|GBEHA441-13|Indian Ocean|BOLD:AAA1631|HE608512  
Acanthaster planci|GBEHA443-13|Indian Ocean|BOLD:AAA1631|HE608510  
Acanthaster planci|GBEH2813-09|French Polynesia|BOLD:AAA1630|FM174496  
Acanthaster planci|GBEH2814-09|French Polynesia|BOLD:AAA1630|FM174495  
Acanthaster planci|GBEH2823-09|BOLD:AAA1630|FM174486  
Acanthaster planci|GBEH2829-09|BOLD:AAA1630|FM174480  
Acanthaster planci|GBEH2811-09|French Polynesia|BOLD:AAA1630|FM174498  
Acanthaster planci|GBEH2634-09|United States|BOLD:AAA1630|FM202071  
Acanthaster planci|GBEH2835-09|BOLD:AAA1630|FM174474  
Acanthaster planci|GBEH2836-09|BOLD:AAA1630|FM174473  
Acanthaster planci|GBEH2632-09|United States|BOLD:AAA1630|FM202073  
Acanthaster planci|GBEH2832-09|BOLD:AAA1630|FM174477  
Acanthaster planci|GBEH2831-09|BOLD:AAA1630|FM174478  
Acanthaster planci|GBEH2635-09|United States|BOLD:AAA1630|FM202070  
Acanthaster planci|GBEH2631-09|United States|BOLD:AAA1630|FM202074  
Acanthaster planci|GBEH2633-09|United States|BOLD:AAA1630|FM202072  
Acanthaster planci|GBEH2833-09|BOLD:AAA1630|FM174476  
Acanthaster planci|GBEH2834-09|BOLD:AAA1630|FM174475  
Acanthaster planci|GBEH2837-09|BOLD:AAA1630|FM174472  
Acanthaster planci|GBEH2817-09|United States|BOLD:AAA1630|FM174492  
Acanthaster planci|GBEH2630-09|French Polynesia|BOLD:AAA1630|FM202075  
Acanthaster planci|GBEH2646-09|Vanuatu|BOLD:AAA1630|FM177193  
Acanthaster planci|GBEH2648-09|Vanuatu|BOLD:AAA1630|FM177191  
Acanthaster planci|GBEH2816-09|United States|BOLD:AAA1630|FM174493  
Acanthaster planci|GBEH2818-09|United States|BOLD:AAA1630|FM174491  
Acanthaster planci|GBEH2815-09|United States|BOLD:AAA1630|FM174494  
Acanthaster planci|GBEH2810-09|French Polynesia|BOLD:AAA1630|FM174499  
Acanthaster planci|GBEH2649-09|Vanuatu|BOLD:AAA1630|FM177190  
Acanthaster planci|GBEH2647-09|Vanuatu|BOLD:AAA1630|FM177192  
Acanthaster planci|GBEHA1406-14|BOLD:AAA1630|KF012827  
Acanthaster planci|GBMND31044-21|BOLD:AAA1630|MW238283  
Acanthaster planci|GBMND31075-21|BOLD:AAA1630|MW238314  
Acanthaster planci|GBMND31071-21|BOLD:AAA1630|MW238310  
Acanthaster planci|GBMND31090-21|BOLD:AAA1630|MW238329  
Acanthaster planci|GBMND31102-21|BOLD:AAA1630|MW238248  
Acanthaster planci|GBMND31147-21|BOLD:AAA1630|MW238196  
Acanthaster planci|GBMND31162-21|BOLD:AAA1630|MW238211  
Acanthaster planci|GBMND31173-21|BOLD:AAA1630|MW238222  
Acanthaster planci|GBEH2825-09|BOLD:AAA1630|FM174484  
Acanthaster planci|GBEH2643-09|Vanuatu|BOLD:AAA1630|FM177196  
Acanthaster planci|GBEH2822-09|United States|BOLD:AAA1630|FM174487  
Acanthaster planci|GBMND31042-21|BOLD:AAA1630|MW238281  
Acanthaster planci|GBMND31043-21|BOLD:AAA1630|MW238282  
Acanthaster planci|GBMND31081-21|BOLD:AAA1630|MW238320  
Acanthaster planci|GBMND31160-21|BOLD:AAA1630|MW238209  
Acanthaster planci|GBMND31177-21|BOLD:AAA1630|MW238226  
Acanthaster planci|GBMND31088-21|BOLD:AAA1630|MW238327  
Acanthaster planci|GBMND31161-21|BOLD:AAA1630|MW238210  
Acanthaster planci|GBMND31189-21|BOLD:AAA1630|MW238238  
Acanthaster planci|GBMND31194-21|BOLD:AAA1630|MW238243  
Acanthaster planci|GBEH2639-09|Philippines|BOLD:AAA1630|FM177200  
Acanthaster planci|GBEH2775-09|Australia|BOLD:AAA1630|FM174534  
Acanthaster planci|GBEH2770-09|Indonesia|BOLD:AAA1630|FM174539  
Acanthaster planci|GBEH2776-09|Australia|BOLD:AAA1630|FM174533  
Acanthaster planci|GBMND31092-21|BOLD:AAA1630|MW238331  
Acanthaster planci|GBMND31135-21|BOLD:AAA1630|MW238184  
Acanthaster planci|GRFH7640-09|Philippines|BOLD:AAA1630|FM177199

Acanthaster planci|GBMND31092-21||BOLD:AAA1630|MW238331  
Acanthaster planci|GBMND31135-21||BOLD:AAA1630|MW238184  
Acanthaster planci|GBEH2640-09|Philippines|BOLD:AAA1630|FM177199  
Acanthaster planci|GBMND31111-21||BOLD:AAA1630|MW238257  
Acanthaster planci|GBMND31124-21||BOLD:AAA1630|MW238270  
Acanthaster planci|GBMND31085-21||BOLD:AAA1630|MW238324  
Acanthaster planci|GBMND31040-21||BOLD:AAA1630|MW238279  
Acanthaster planci|GBMND31084-21||BOLD:AAA1630|MW238323  
Acanthaster planci|GBMND31167-21||BOLD:AAA1630|MW238216  
Acanthaster planci|GBEH2771-09|Indonesia|BOLD:AAA1630|FM174538  
Acanthaster planci|GBEH2603-09|Costa Rica|BOLD:AAA1630|FM202086  
Acanthaster planci|GBEH2608-09|Costa Rica|BOLD:AAA1630|FM202081  
Acanthaster planci|GBEH2809-09|Guam|BOLD:AAA1630|FM174500  
Acanthaster planci|GBMND31128-21||BOLD:AAA1630|MW238274  
Acanthaster planci|GBMND31091-21||BOLD:AAA1630|MW238330  
Acanthaster planci|GBMND31045-21||BOLD:AAA1630|MW238284  
Acanthaster planci|GBEH2826-09||BOLD:AAA1630|FM174483  
Acanthaster planci|GBEH2821-09|United States|BOLD:AAA1630|FM174488  
Acanthaster planci|GBEH2820-09|United States|BOLD:AAA1630|FM174489  
Acanthaster planci|GBEH2808-09|Guam|BOLD:AAA1630|FM174501  
Acanthaster planci|GBEH2807-09|Guam|BOLD:AAA1630|FM174502  
Acanthaster planci|GBEH2795-09|Australia|BOLD:AAA1630|FM174514  
Acanthaster planci|GBEH2794-09|Australia|BOLD:AAA1630|FM174515  
Acanthaster planci|GBEH2792-09|Australia|BOLD:AAA1630|FM174517  
Acanthaster planci|GBEH2791-09|Australia|BOLD:AAA1630|FM174518  
Acanthaster planci|GBEH2788-09|Australia|BOLD:AAA1630|FM174521  
Acanthaster planci|GBEH2645-09|Vanuatu|BOLD:AAA1630|FM177194  
Acanthaster planci|GBEH2613-09|Costa Rica|BOLD:AAA1630|FM202076  
Acanthaster planci|GBEH2612-09|Costa Rica|BOLD:AAA1630|FM202077  
Acanthaster planci|GBEH2611-09|Costa Rica|BOLD:AAA1630|FM202078  
Acanthaster planci|GBEH2610-09|Costa Rica|BOLD:AAA1630|FM202079  
Acanthaster planci|GBEH2609-09|Costa Rica|BOLD:AAA1630|FM202080  
Acanthaster planci|GBEH2607-09|Costa Rica|BOLD:AAA1630|FM202082  
Acanthaster planci|GBEH2606-09|Costa Rica|BOLD:AAA1630|FM202083  
Acanthaster planci|GBEH2605-09|Costa Rica|BOLD:AAA1630|FM202084  
Acanthaster planci|GBEH2604-09|Costa Rica|BOLD:AAA1630|FM202085  
Acanthaster planci|GBEH2602-09|Costa Rica|BOLD:AAA1630|FM202087  
Acanthaster planci|GBEH2601-09|Costa Rica|BOLD:AAA1630|FM202088  
Acanthaster planci|GBEH2600-09|Panama|BOLD:AAA1630|FM202089  
Acanthaster planci|GBEH2599-09|Panama|BOLD:AAA1630|FM202090  
Acanthaster planci|GBEHA1405-14||BOLD:AAA1630|KF012826  
Acanthaster planci|GBMND31140-21||BOLD:AAA1630|MW238189  
Acanthaster planci|GBMND31159-21||BOLD:AAA1630|MW238208  
Acanthaster planci|GBMND31179-21||BOLD:AAA1630|MW238228  
Acanthaster planci|GBMND31184-21||BOLD:AAA1630|MW238233  
Acanthaster planci|GBMND31087-21||BOLD:AAA1630|MW238326  
Acanthaster planci|GBEH2828-09||BOLD:AAA1630|FM174481  
Acanthaster planci|GBEH2824-09||BOLD:AAA1630|FM174485  
Acanthaster planci|GBEH2806-09|Guam|BOLD:AAA1630|FM174503  
Acanthaster planci|GBEH2642-09|Philippines|BOLD:AAA1630|FM177197  
Acanthaster planci|GBMND31136-21||BOLD:AAA1630|MW238185  
Acanthaster planci|GBMND31192-21||BOLD:AAA1630|MW238241  
Acanthaster planci|GBMND31072-21||BOLD:AAA1630|MW238311  
Acanthaster planci|GBMND31094-21||BOLD:AAA1630|MW238333  
Acanthaster planci|GBMND31156-21||BOLD:AAA1630|MW238205  
Acanthaster planci|GBMND31142-21||BOLD:AAA1630|MW238191  
Acanthaster planci|GBMND31138-21||BOLD:AAA1630|MW238187  
Acanthaster planci|GBMND31134-21||BOLD:AAA1630|MW238343  
Acanthaster planci|GBMND31123-21||BOLD:AAA1630|MW238269  
Acanthaster planci|GBMND31120-21||BOLD:AAA1630|MW238266  
Acanthaster planci|GBMND31115-21||BOLD:AAA1630|MW238261  
Acanthaster planci|GBMND31110-21||BOLD:AAA1630|MW238256  
Acanthaster planci|GBMND31105-21||BOLD:AAA1630|MW238251  
Acanthaster planci|GBMND31104-21||BOLD:AAA1630|MW238250  
Acanthaster planci|GBMND31103-21||BOLD:AAA1630|MW238249  
Acanthaster planci|GBMND31086-21||BOLD:AAA1630|MW238325  
Acanthaster planci|GBMND31082-21||BOLD:AAA1630|MW238321  
Acanthaster planci|GBMND31080-21||BOLD:AAA1630|MW238319  
Acanthaster planci|GBMND31077-21||BOLD:AAA1630|MW238316  
Acanthaster planci|GBMND31076-21||BOLD:AAA1630|MW238315  
Acanthaster planci|GBMND31073-21||BOLD:AAA1630|MW238312  
Acanthaster planci|GBMND31067-21||BOLD:AAA1630|MW238306  
Acanthaster planci|GBMND31064-21||BOLD:AAA1630|MW238303  
Acanthaster planci|GBMND31058-21||BOLD:AAA1630|MW238297  
Acanthaster planci|GBMND31049-21||BOLD:AAA1630|MW238288  
Acanthaster planci|GBMND31047-21||BOLD:AAA1630|MW238286  
Acanthaster planci|GBMND31046-21||BOLD:AAA1630|MW238285  
Acanthaster planci|GBMND31039-21||BOLD:AAA1630|MW238278  
Acanthaster planci|GBMND31158-21||BOLD:AAA1630|MW238207  
Acanthaster planci|GBMND31165-21||BOLD:AAA1630|MW238214  
Acanthaster planci|GBMND31127-21||BOLD:AAA1630|MW238273  
Acanthaster planci|GBMND31041-21||BOLD:AAA1630|MW238280  
Acanthaster planci|GBMND31185-21||BOLD:AAA1630|MW238234  
Acanthaster planci|GBMND31190-21||BOLD:AAA1630|MW238239  
Acanthaster planci|GBMND31191-21||BOLD:AAA1630|MW238240  
Acanthaster planci|GBMND31196-21||BOLD:AAA1630|MW238245  
Acanthaster planci|GBMND31059-21||BOLD:AAA1630|MW238298  
Acanthaster planci|GBMND31197-21||BOLD:AAA1630|MW238246  
Acanthaster planci|GBMND31193-21||BOLD:AAA1630|MW238242  
Acanthaster planci|GBMND31050-21||BOLD:AAA1630|MW238289  
Acanthaster planci|GBMND31112-21||BOLD:AAA1630|MW238258  
Acanthaster planci|GBEH2802-09|Guam|BOLD:AAA1630|FM174507  
Acanthaster planci|GBEH2827-09||BOLD:AAA1630|FM174482  
Acanthaster planci|GBMND31187-21||BOLD:AAA1630|MW238236  
Acanthaster planci|GBMND31188-21||BOLD:AAA1630|MW238237  
Acanthaster planci|GBMND31062-21||BOLD:AAA1630|MW238301  
Acanthaster planci|GBMND31089-21||BOLD:AAA1630|MW238328  
Acanthaster planci|GBMND31109-21||BOLD:AAA1630|MW238255  
Acanthaster planci|GBMND31063-21||BOLD:AAA1630|MW238302  
Acanthaster planci|GBMND31093-21||BOLD:AAA1630|MW238332  
Acanthaster planci|GBMND31152-21||BOLD:AAA1630|MW238201

Acanthaster planci|GBMND31003-21||BOLD:AAA1630|MW238202  
Acanthaster planci|GBMND31093-21||BOLD:AAA1630|MW238332  
Acanthaster planci|GBMND31152-21||BOLD:AAA1630|MW238201  
Acanthaster planci|GBMND31176-21||BOLD:AAA1630|MW238225  
Acanthaster planci|GBMND31178-21||BOLD:AAA1630|MW238227  
Acanthaster planci|GBMND31083-21||BOLD:AAA1630|MW238322  
Acanthaster planci|GBEH2644-09|Vanuatu|BOLD:AAA1630|FM177195  
Acanthaster planci|GBMND31145-21||BOLD:AAA1630|MW238194  
Acanthaster planci|GBEH2638-09|Philippines|BOLD:AAA1630|FM177201  
Acanthaster planci|GBMND31154-21||BOLD:AAA1630|MW238203  
Acanthaster planci|GBMND31148-21||BOLD:AAA1630|MW238197  
Acanthaster planci|GBEH2799-09|Japan|BOLD:AAA1630|FM174510  
Acanthaster planci|GBEH2796-09|Japan|BOLD:AAA1630|FM174513  
Acanthaster planci|GBEH2636-09|Philippines|BOLD:AAA1630|FM177203  
Acanthaster planci|GBMND31155-21||BOLD:AAA1630|MW238204  
Acanthaster planci|GBMND31074-21||BOLD:AAA1630|MW238313  
Acanthaster planci|GBEH2767-09|Indonesia|BOLD:AAA1630|FM174542  
Acanthaster planci|GBMND31106-21||BOLD:AAA1630|MW238252  
Acanthaster planci|GBMND31182-21||BOLD:AAA1630|MW238231  
Acanthaster planci|GBMND31151-21||BOLD:AAA1630|MW238200  
Acanthaster planci|GBMND31078-21||BOLD:AAA1630|MW238317  
Acanthaster|GBMNB37761-20|Australia|BOLD:AAA1630|MT052847  
Acanthaster planci|GBMND31108-21||BOLD:AAA1630|MW238254  
Acanthaster planci|GBMND31052-21||BOLD:AAA1630|MW238291  
Acanthaster planci|GBMND31069-21||BOLD:AAA1630|MW238308  
Acanthaster planci|GBMND31171-21||BOLD:AAA1630|MW238220  
Acanthaster planci|GBMND31170-21||BOLD:AAA1630|MW238219  
Acanthaster planci|GBMND31169-21||BOLD:AAA1630|MW238218  
Acanthaster planci|GBMND31168-21||BOLD:AAA1630|MW238217  
Acanthaster planci|GBMND31166-21||BOLD:AAA1630|MW238215  
Acanthaster planci|GBMND31164-21||BOLD:AAA1630|MW238213  
Acanthaster planci|GBMND31157-21||BOLD:AAA1630|MW238206  
Acanthaster planci|GBMND31153-21||BOLD:AAA1630|MW238202  
Acanthaster planci|GBMND31150-21||BOLD:AAA1630|MW238199  
Acanthaster planci|GBMND31149-21||BOLD:AAA1630|MW238198  
Acanthaster planci|GBMND31146-21||BOLD:AAA1630|MW238195  
Acanthaster planci|GBMND31144-21||BOLD:AAA1630|MW238193  
Acanthaster planci|GBMND31143-21||BOLD:AAA1630|MW238192  
Acanthaster planci|GBMND31141-21||BOLD:AAA1630|MW238190  
Acanthaster planci|GBMND31137-21||BOLD:AAA1630|MW238186  
Acanthaster planci|GBMND31133-21||BOLD:AAA1630|MW238342  
Acanthaster planci|GBMND31132-21||BOLD:AAA1630|MW238341  
Acanthaster planci|GBMND31131-21||BOLD:AAA1630|MW238277  
Acanthaster planci|GBMND31130-21||BOLD:AAA1630|MW238276  
Acanthaster planci|GBMND31129-21||BOLD:AAA1630|MW238275  
Acanthaster planci|GBMND31126-21||BOLD:AAA1630|MW238272  
Acanthaster planci|GBMND31125-21||BOLD:AAA1630|MW238271  
Acanthaster planci|GBMND31122-21||BOLD:AAA1630|MW238268  
Acanthaster planci|GBMND31121-21||BOLD:AAA1630|MW238267  
Acanthaster planci|GBMND31119-21||BOLD:AAA1630|MW238265  
Acanthaster planci|GBMND31117-21||BOLD:AAA1630|MW238263  
Acanthaster planci|GBMND31116-21||BOLD:AAA1630|MW238262  
Acanthaster planci|GBMND31113-21||BOLD:AAA1630|MW238259  
Acanthaster planci|GBMND31101-21||BOLD:AAA1630|MW238340  
Acanthaster planci|GBMND31100-21||BOLD:AAA1630|MW238339  
Acanthaster planci|GBMND31099-21||BOLD:AAA1630|MW238338  
Acanthaster planci|GBMND31098-21||BOLD:AAA1630|MW238337  
Acanthaster planci|GBMND31097-21||BOLD:AAA1630|MW238336  
Acanthaster planci|GBMND31096-21||BOLD:AAA1630|MW238335  
Acanthaster planci|GBMND31079-21||BOLD:AAA1630|MW238318  
Acanthaster planci|GBMND31070-21||BOLD:AAA1630|MW238309  
Acanthaster planci|GBMND31068-21||BOLD:AAA1630|MW238307  
Acanthaster planci|GBMND31066-21||BOLD:AAA1630|MW238305  
Acanthaster planci|GBMND31065-21||BOLD:AAA1630|MW238304  
Acanthaster planci|GBMND31061-21||BOLD:AAA1630|MW238300  
Acanthaster planci|GBMND31060-21||BOLD:AAA1630|MW238299  
Acanthaster planci|GBMND31056-21||BOLD:AAA1630|MW238295  
Acanthaster planci|GBMND31055-21||BOLD:AAA1630|MW238294  
Acanthaster planci|GBMND31053-21||BOLD:AAA1630|MW238292  
Acanthaster planci|GBMND31051-21||BOLD:AAA1630|MW238290  
Acanthaster planci|GBMND31048-21||BOLD:AAA1630|MW238287  
Acanthaster planci|GBEH2830-09||BOLD:AAA1630|FM174479  
Acanthaster planci|GBEH2805-09|Guam|BOLD:AAA1630|FM174504  
Acanthaster planci|GBEH2804-09|Guam|BOLD:AAA1630|FM174505  
Acanthaster planci|GBEH2803-09|Guam|BOLD:AAA1630|FM174506  
Acanthaster planci|GBEH2801-09|Japan|BOLD:AAA1630|FM174508  
Acanthaster planci|GBEH2798-09|Japan|BOLD:AAA1630|FM174511  
Acanthaster planci|GBEH2797-09|Japan|BOLD:AAA1630|FM174512  
Acanthaster planci|GBEH2793-09|Australia|BOLD:AAA1630|FM174516  
Acanthaster planci|GBEH2790-09|Australia|BOLD:AAA1630|FM174519  
Acanthaster planci|GBEH2789-09|Australia|BOLD:AAA1630|FM174520  
Acanthaster planci|GBEH2787-09|Australia|BOLD:AAA1630|FM174522  
Acanthaster planci|GBEH2786-09|Australia|BOLD:AAA1630|FM174523  
Acanthaster planci|GBEH2785-09|Australia|BOLD:AAA1630|FM174524  
Acanthaster planci|GBEH2784-09|Australia|BOLD:AAA1630|FM174525  
Acanthaster planci|GBEH2782-09|Australia|BOLD:AAA1630|FM174527  
Acanthaster planci|GBEH2780-09|Australia|BOLD:AAA1630|FM174529  
Acanthaster planci|GBEH2779-09|Australia|BOLD:AAA1630|FM174530  
Acanthaster planci|GBEH2778-09|Australia|BOLD:AAA1630|FM174531  
Acanthaster planci|GBEH2777-09|Australia|BOLD:AAA1630|FM174532  
Acanthaster planci|GBEH2774-09|Australia|BOLD:AAA1630|FM174535  
Acanthaster planci|GBEH2773-09|Australia|BOLD:AAA1630|FM174536  
Acanthaster planci|GBEH2772-09|Indonesia|BOLD:AAA1630|FM174537  
Acanthaster planci|GBEH2769-09|Indonesia|BOLD:AAA1630|FM174540  
Acanthaster planci|GBEH2768-09|Indonesia|BOLD:AAA1630|FM174541  
Acanthaster planci|GBEH2766-09|Indonesia|BOLD:AAA1630|FM174543  
Acanthaster planci|GBEH2765-09|Indonesia|BOLD:AAA1630|FM174544  
Acanthaster planci|GBEH2641-09|Philippines|BOLD:AAA1630|FM177198  
Acanthaster planci|GBEH2637-09|Philippines|BOLD:AAA1630|FM177202  
Acanthaster planci|GBMND31114-21||BOLD:AAA1630|MW238260  
Acanthaster planci|GBEH2783-09|Australia|BOLD:AAA1630|FM174526  
Acanthaster planci|GBEH2800-09|Japan|BOLD:AAA1630|FM174509

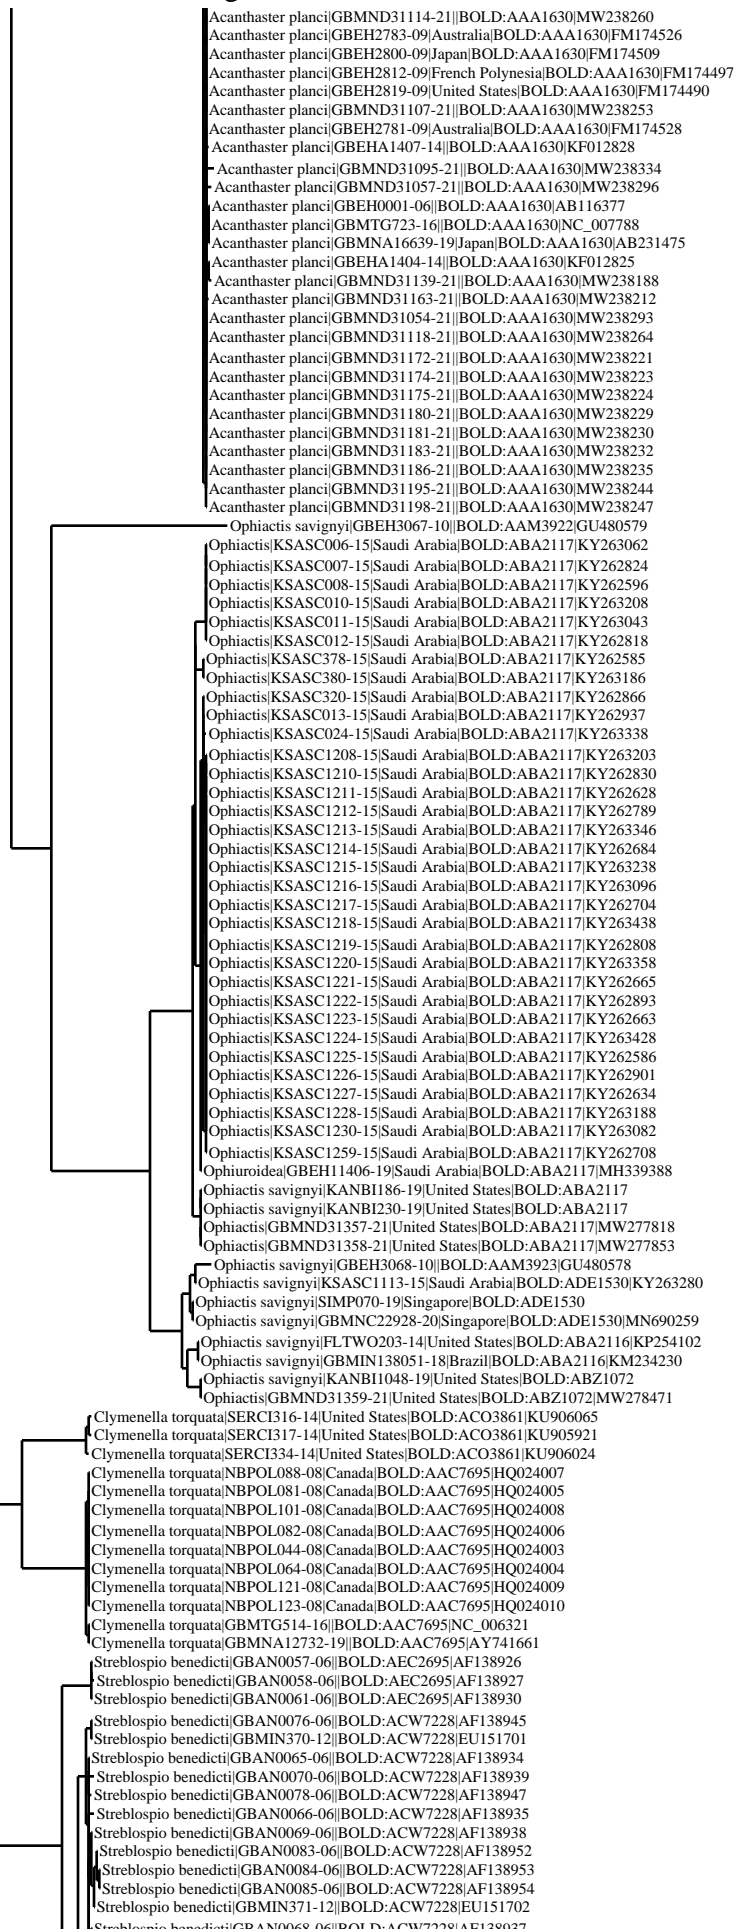

Streblospio benedicti|GBAN0085-06||BOLD:ACW7228|AF138954  
Streblospio benedicti|GBMIN371-12||BOLD:ACW7228|EU151702  
Streblospio benedicti|GBAN0068-06||BOLD:ACW7228|AF138937  
Streblospio benedicti|GBAN0079-06||BOLD:ACW7228|AF138948  
Streblospio benedicti|GBAN0080-06||BOLD:ACW7228|AF138949  
Streblospio benedicti|GBAN0081-06||BOLD:ACW7228|AF138950  
Streblospio benedicti|GBAN0082-06||BOLD:ACW7228|AF138951  
Streblospio benedicti|GBAN0077-06||BOLD:ACW7228|AF138946  
Streblospio benedicti|GBAN0072-06||BOLD:ACW7228|AF138941  
Streblospio benedicti|GBAN0073-06||BOLD:ACW7228|AF138942  
Streblospio benedicti|GBAN0074-06||BOLD:ACW7228|AF138943  
Streblospio benedicti|GBMIN369-12||BOLD:ACW7228|EU151700  
Streblospio benedicti|GBMIN367-12||BOLD:ACW7228|EU151698  
Streblospio benedicti|GBMIN366-12||BOLD:ACW7228|EU151697  
Streblospio benedicti|GBAN0067-06||BOLD:ACW7228|AF138936  
Streblospio benedicti|GBAN0071-06||BOLD:ACW7228|AF138940  
Streblospio benedicti|GBMIN372-12||BOLD:ACW7228|EU151703  
Streblospio benedicti|GBMIN373-12||BOLD:ACW7228|EU151704  
Streblospio benedicti|GBAN20917-19|United States|BOLD:ACW7228|MK598558  
Pseudonereis anomala|GBAN5431-14|Australia|BOLD:ABX3857|JX420267  
Pseudonereis anomala|GBAN5433-14|Australia|BOLD:ABX3857|JX420269  
Pseudonereis anomala|GBAN5447-14|Australia|BOLD:ABX3850|JX420278  
Pseudonereis anomala|GBAN5416-14|Australia|BOLD:ABX3851|JX420272  
Pseudonereis anomala|GBAN5434-14|Australia|BOLD:ABX3855|JX420270  
Pseudonereis anomala|GBAN5432-14|Australia|BOLD:ABX3855|JX420268  
Pseudonereis anomala|GBAN5435-14|Australia|BOLD:ABX3855|JX420271  
Pseudonereis anomala|GBAN5402-14|Australia|BOLD:ABX3856|JX420264  
Pseudonereis anomala|GBAN5403-14|Australia|BOLD:ABX3856|JX420265  
Pseudonereis anomala|GBAN5405-14|Australia|BOLD:ABX3856|JX420266  
Pseudonereis anomala|GBAN5419-14|Australia|BOLD:ABX3854|JX420275  
Pseudonereis anomala|GBAN5420-14|Australia|BOLD:ABX3854|JX420276  
Pseudonereis anomala|GBAN5417-14|Australia|BOLD:ABX3854|JX420273  
Pseudonereis anomala|GBAN5418-14|Australia|BOLD:ABX3854|JX420274  
Pseudonereis anomala|GBAN5421-14|Australia|BOLD:ABX3854|JX420277  
Pseudonereis anomala|GBAN5449-14|Australia|BOLD:ABX3852|JX420258  
Pseudonereis anomala|GBAN5452-14|Australia|BOLD:ABX3852|JX420261  
Pseudonereis anomala|GBAN5453-14|Australia|BOLD:ABX3852|JX420262  
Pseudonereis anomala|GBAN5451-14|Australia|BOLD:ABX3853|JX420260  
Pseudonereis anomala|GBAN5450-14|Australia|BOLD:ABX3853|JX420259  
Pseudonereis anomala|GBAN5454-14|Australia|BOLD:ABX3853|JX420263  
Sabellaria spinulosa|BCAS010-13|Spain|BOLD:ACJ4313|KF808174  
Sabellaria spinulosa|GBAN6778-15|Italy|BOLD:ACV9400|KR013049  
Sabellaria spinulosa|GBAN6779-15|Italy|BOLD:ACV9400|KR013048  
Eusyllis kupfferi|GBMIN1392-12|Australia|BOLD:ACB6558|JP903758  
Eusyllis kupfferi|GBMNE32147-21||BOLD:AEN5572|MZ224430  
Eusyllis kupfferi|GBMNE32148-21||BOLD:AEN5571|MZ224424  
Haliotis tuberculata|GBMLG0835-06||BOLD:AA1662|AY377729  
Haliotis tuberculata|GBMLG3400-07||BOLD:AA1662|EF660359  
Haliotis tuberculata|GBMLG3396-07||BOLD:AA1662|EF660363  
Haliotis tuberculata|GBMLG7572-09||BOLD:AA1662|EF660357  
Haliotis tuberculata|GBMLG17936-14|France|BOLD:ACQ0883|FJ605488  
Haliotis tuberculata subsp. AVW2009|GBMLG18651-14|Senegal|BOLD:ACQ1958|FJ605487  
Oenone fulgida|GBAN0371-06||BOLD:AAH2283|AY838872  
Oenonidae|YCHAE426-08|Mexico|BOLD:AAH2283  
Oenone fulgida|GBAN18141-19||BOLD:ADR2070|MH159192  
Oenone fulgida|GBAN18142-19||BOLD:ADR2070|MH159195  
Oenone fulgida|KANB1135-19|United States|BOLD:ADV9970  
Oenone fulgida|KANB1361-19|United States|BOLD:ADV9970  
Oenone|GBMND29603-21|United States|BOLD:ADV9970|MW277780  
Oenone|GBMND29604-21|United States|BOLD:ADV9970|MW277956  
Oenone fulgida|KANB1807-19|United States|BOLD:ADV9971  
Oenone|GBMND29605-21|United States|BOLD:ADV9971|MW278289  
Timarete caribous|GBAN6579-15|Brazil|BOLD:ACN3964|KM192170  
Timarete caribous|GBAN6578-15|Brazil|BOLD:ACN3964|KM192171  
Timarete caribous|GBAN6580-15|Brazil|BOLD:ACN3964|KM192169  
Timarete caribous|GBAN6569-15|Brazil|BOLD:ACN3626|KM192168  
Timarete caribous|GBAN6571-15|Brazil|BOLD:ACN3626|KM192166  
Timarete caribous|GBAN6581-15|Brazil|BOLD:ACN3626|KM192174  
Timarete caribous|GBAN6583-15|Brazil|BOLD:ACN3626|KM192172  
Timarete caribous|GBAN6570-15|Brazil|BOLD:ACN3626|KM192167  
Timarete caribous|GBAN6582-15|Brazil|BOLD:ACN3626|KM192173  
Timarete caribous|GBAN6587-15|Brazil|BOLD:ACN3626|KM192177  
Timarete caribous|GBAN6588-15|Brazil|BOLD:ACN3626|KM192176  
Timarete caribous|GBAN6589-15|Brazil|BOLD:ACN3626|KM192175  
Timarete punctata|GBAN13526-19||BOLD:ADW7243|KY061282  
Timarete punctata|GBAN13527-19||BOLD:ADW7243|KY061283  
Timarete punctata|GBAN13524-19||BOLD:ADW7243|KY061280  
Timarete punctata|GBAN13525-19||BOLD:ADW7243|KY061281  
Timarete punctata|GBAN13528-19||BOLD:ADW7243|KY061284  
Timarete punctata|GBAN13529-19||BOLD:ADW7243|KY061285  
Timarete punctata|GBAN6586-15|Brazil|BOLD:ACN6293|KM192183  
Timarete punctata|GBAN6585-15|Brazil|BOLD:ACN6293|KM192184  
Timarete punctata|GBAN6584-15|Brazil|BOLD:ACN6293|KM192185  
Timarete punctata|GBAN6577-15|Brazil|BOLD:ACN6293|KM192186  
Timarete punctata|GBAN6576-15|Brazil|BOLD:ACN6293|KM192187  
Timarete punctata|GBAN6575-15|Brazil|BOLD:ACN6293|KM192188  
Timarete punctata|GBAN6574-15|Brazil|BOLD:ACN6293|KM192180  
Timarete punctata|GBAN6573-15|Brazil|BOLD:ACN6293|KM192181  
Timarete punctata|GBAN6572-15|Brazil|BOLD:ACN6293|KM192182  
Timarete punctata|GBAN13506-19||BOLD:ACN6293|KY061208  
Timarete punctata|GBAN9419-17||BOLD:ACN6293|KY061255  
Timarete punctata|GBAN9386-17||BOLD:ACN6293|KY061207  
Timarete punctata|GBAN9385-17||BOLD:ACN6293|KY061242  
Timarete punctata|GBAN9376-17||BOLD:ACN6293|KY061257  
Timarete punctata|GBAN9359-17||BOLD:ACN6293|KY061258  
Timarete punctata|GBAN9353-17||BOLD:ACN6293|KY061233  
Timarete punctata|GBAN9338-17||BOLD:ACN6293|KY061237  
Timarete punctata|GBAN9333-17||BOLD:ACN6293|KY061222  
Timarete punctata|GBAN9323-17||BOLD:ACN6293|KY061239  
Timarete punctata|GBAN9297-17||BOLD:ACN6293|KY061225  
Timarete punctata|GBAN9284-17||BOLD:ACN6293|KY061219

Timarete punctata|GBAN9525-17||BOLD:ACN6293|KY061239  
Timarete punctata|GBAN9297-17||BOLD:ACN6293|KY061225  
Timarete punctata|GBAN9284-17||BOLD:ACN6293|KY061219  
Timarete punctata|GBAN9248-17||BOLD:ACN6293|KY061241  
Timarete punctata|GBAN9247-17||BOLD:ACN6293|KY061216  
Timarete punctata|GBAN9223-17||BOLD:ACN6293|KY061230  
Timarete punctata|GBAN9197-17||BOLD:ACN6293|KY061220  
Timarete punctata|GBAN9185-17||BOLD:ACN6293|KY061254  
Timarete punctata|GBAN9184-17||BOLD:ACN6293|KY061236  
Timarete punctata|GBAN9177-17||BOLD:ACN6293|KY061214  
Timarete punctata|GBAN9145-17||BOLD:ACN6293|KY061227  
Timarete punctata|GBAN9137-17||BOLD:ACN6293|KY061246  
Timarete punctata|GBAN9118-17||BOLD:ACN6293|KY061232  
Timarete punctata|GBAN9068-17||BOLD:ACN6293|KY061212  
Timarete punctata|GBAN9016-17||BOLD:ACN6293|KY061229  
Timarete punctata|GBAN8992-17||BOLD:ACN6293|KY061245  
Timarete punctata|GBAN8968-17||BOLD:ACN6293|KY061262  
Timarete punctata|GBAN9296-17||BOLD:ACN6293|KY061261  
Timarete punctata|GBAN9430-17||BOLD:ACN6293|KY061260  
Timarete punctata|GBAN9457-17||BOLD:ACN6293|KY061234  
Timarete punctata|GBAN9459-17||BOLD:ACN6293|KY061223  
Timarete punctata|GBAN9460-17||BOLD:ACN6293|KY061231  
Timarete punctata|GBAN9489-17||BOLD:ACN6293|KY061205  
Timarete punctata|GBAN9522-17||BOLD:ACN6293|KY061252  
Timarete punctata|GBAN9564-17||BOLD:ACN6293|KY061235  
Timarete punctata|GBAN9565-17||BOLD:ACN6293|KY061243  
Timarete punctata|GBAN9576-17||BOLD:ACN6293|KY061204  
Timarete punctata|GBAN9594-17||BOLD:ACN6293|KY061210  
Timarete punctata|GBAN9595-17||BOLD:ACN6293|KY061217  
Timarete punctata|GBAN9596-17||BOLD:ACN6293|KY061240  
Timarete punctata|GBAN9598-17||BOLD:ACN6293|KY061253  
Timarete punctata|GBAN9622-17||BOLD:ACN6293|KY061238  
Timarete punctata|GBAN9623-17||BOLD:ACN6293|KY061211  
Timarete punctata|GBAN9650-17||BOLD:ACN6293|KY061221  
Timarete punctata|GBAN13505-19||BOLD:ACN6293|KY061206  
Timarete punctata|GBAN13507-19||BOLD:ACN6293|KY061209  
Timarete punctata|GBAN13508-19||BOLD:ACN6293|KY061213  
Timarete punctata|GBAN13509-19||BOLD:ACN6293|KY061215  
Timarete punctata|GBAN13510-19||BOLD:ACN6293|KY061218  
Timarete punctata|GBAN13511-19||BOLD:ACN6293|KY061224  
Timarete punctata|GBAN13512-19||BOLD:ACN6293|KY061226  
Timarete punctata|GBAN13513-19||BOLD:ACN6293|KY061228  
Timarete punctata|GBAN13514-19||BOLD:ACN6293|KY061244  
Timarete punctata|GBAN13515-19||BOLD:ACN6293|KY061247  
Timarete punctata|GBAN13516-19||BOLD:ACN6293|KY061248  
Timarete punctata|GBAN13517-19||BOLD:ACN6293|KY061249  
Timarete punctata|GBAN13518-19||BOLD:ACN6293|KY061250  
Timarete punctata|GBAN13519-19||BOLD:ACN6293|KY061251  
Timarete punctata|GBAN13520-19||BOLD:ACN6293|KY061256  
Timarete punctata|GBAN13521-19||BOLD:ACN6293|KY061259  
Timarete punctata|GBAN9013-17||BOLD:ADK6728|KY061264  
Timarete punctata|GBAN9027-17||BOLD:ADK6728|KY061263  
Timarete punctata|GBAN9270-17||BOLD:ADK6728|KY061268  
Timarete punctata|GBAN9521-17||BOLD:ADK6728|KY061265  
Timarete punctata|GBAN9566-17||BOLD:ADK6728|KY061267  
Timarete punctata|GBAN9629-17||BOLD:ADK6728|KY061266  
Timarete punctata|GBAN9298-17||BOLD:ADK6728|KY061279  
Timarete punctata|GBAN9246-17||BOLD:ADK6728|KY061273  
Timarete punctata|GBAN9214-17||BOLD:ADK6728|KY061272  
Timarete punctata|GBAN9155-17||BOLD:ADK6728|KY061270  
Timarete punctata|GBAN9069-17||BOLD:ADK6728|KY061276  
Timarete punctata|GBAN9044-17||BOLD:ADK6728|KY061274  
Timarete punctata|GBAN9017-17||BOLD:ADK6728|KY061269  
Timarete punctata|GBAN9458-17||BOLD:ADK6728|KY061275  
Timarete punctata|GBAN9541-17||BOLD:ADK6728|KY061278  
Timarete punctata|GBAN13522-19||BOLD:ADK6728|KY061271  
Timarete punctata|GBAN13523-19||BOLD:ADK6728|KY061277  
Timarete punctata|KANBI184-19|United States|BOLD:ADW7244  
Timarete punctata|GBMND30290-21|United States|BOLD:ADW7244|MW277817  
Timarete punctata|KANBI1082-19|United States|BOLD:ADW7244  
Timarete punctata|GBMND30291-21|United States|BOLD:ADW7244|MW278491  
Polychaeta|GBAN18199-19|Saudi Arabia|BOLD:ACX1849|MH338545  
Iphione|GBAN17926-19|North Pacific Ocean|BOLD:ACX1849|MH389786  
Aphroditidae|GBAN17727-19|Saudi Arabia|BOLD:ACX1849|MH339431  
Iphione muricata|KANBI1010-19|United States|BOLD:ACX1849  
Iphione|GBMND29631-21|United States|BOLD:ACX1849|MW278440  
Iphione muricata|KANBI764-19|United States|BOLD:AEB2019  
Iphione muricata|GBMND29632-21|United States|BOLD:AEB2019|MW278259  
Perinereis aibuhitensis|GBMND29641-21||BOLD:AEH4751|MT511716  
Perinereis aibuhitensis|GBMND29642-21||BOLD:AEH4751|MT511717  
Perinereis aibuhitensis|GBMND29643-21||BOLD:AEH4751|MT511718  
Perinereis|GBMND29646-21||BOLD:ACC8430|MT511714  
Perinereis|GBMND29649-21||BOLD:ACC8430|MT511712  
Perinereis aibuhitensis|GBAN6190-14||BOLD:ACC8430|KC800613  
Perinereis|GBMND29645-21||BOLD:ACC8430|MT511713  
Perinereis|GBMND29647-21||BOLD:ACC8430|MT511715  
Perinereis aibuhitensis|GBMNC21900-20|China|BOLD:ACC8430|MN256535  
Perinereis aibuhitensis|GBMNA12711-19||BOLD:ACC8430|KF611806  
Perinereis aibuhitensis|GBMTG4706-16||BOLD:ACC8430|NC\_023943  
Perinereis aibuhitensis|GBMNC21899-20|China|BOLD:ACC8430|MN256536  
Perinereis aibuhitensis|GBAN6191-14||BOLD:ACC8430|KC800614  
Perinereis|GBMND29648-21||BOLD:ACC8430|MT511711  
Perinereis aibuhitensis|GBAN6188-14||BOLD:ACC8430|KC800611  
Perinereis aibuhitensis|GBAN6189-14||BOLD:ACC8430|KC800612  
Perinereis aibuhitensis|GBAN9015-17|China|BOLD:ACC8430|KY129885  
Perinereis aibuhitensis|GBMNC21901-20|China|BOLD:ACC8430|MN256534  
Perinereis aibuhitensis|GBMND44683-21|China|BOLD:ACC8430|MW593148  
Perinereis aibuhitensis|GBMNE32100-21||BOLD:ACC8430|MT712474  
Tubificoides benedii|GAHAP2271-14|United Kingdom|BOLD:ACQ0960|HM460120  
Tubificoides benedii|GAHAP2278-14|United Kingdom|BOLD:ACQ0960|HM460127  
Tubificoides benedii|GAHAP2279-14|United Kingdom|BOLD:ACQ0960|HM460128  
Tubificoides benedii|GAHAP2280-14|United Kingdom|BOLD:ACQ0960|HM460129



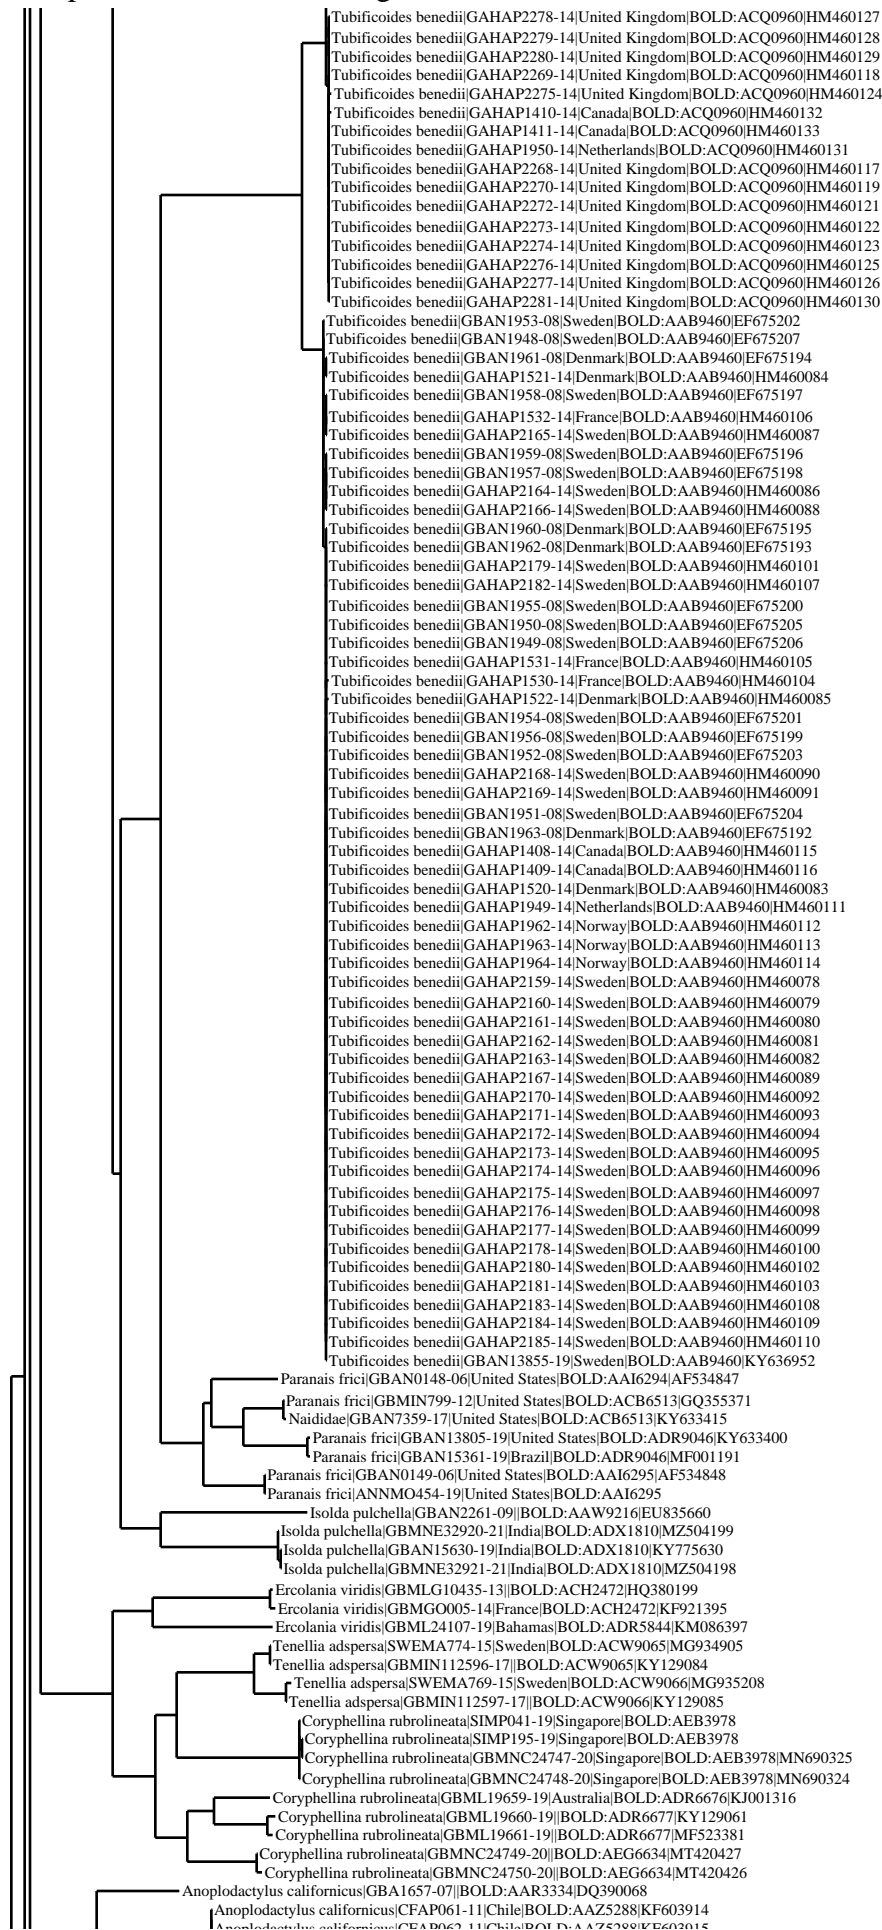

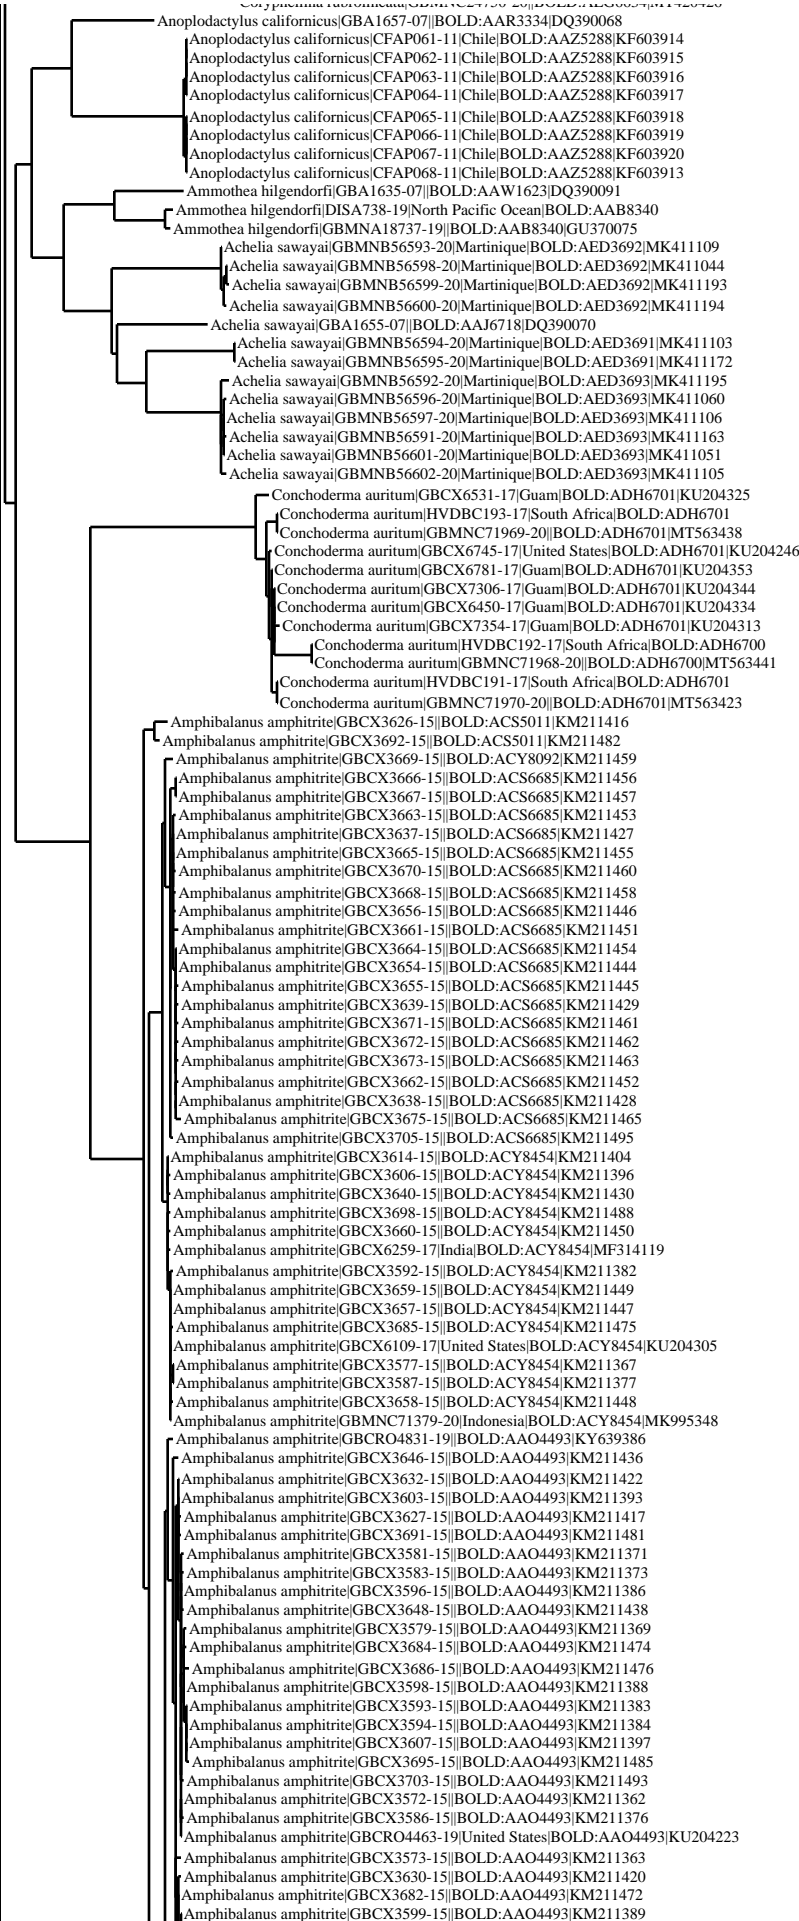

Amphibalanus amphitrite|GBCX3630-15||BOLD:AAO4493|KM211420  
Amphibalanus amphitrite|GBCX3682-15||BOLD:AAO4493|KM211472  
Amphibalanus amphitrite|GBCX3599-15||BOLD:AAO4493|KM211389  
Amphibalanus amphitrite|GBCX3604-15||BOLD:AAO4493|KM211394  
Amphibalanus amphitrite|GBCX3687-15||BOLD:AAO4493|KM211477  
Amphibalanus amphitrite|ZPC337-15|United States|BOLD:AAO4493  
Amphibalanus amphitrite|ZPC336-15|United States|BOLD:AAO4493  
Amphibalanus amphitrite|GBCX3678-15||BOLD:AAO4493|KM211468  
Amphibalanus amphitrite|GBCX3633-15||BOLD:AAO4493|KM211423  
Amphibalanus amphitrite|GBCX3631-15||BOLD:AAO4493|KM211421  
Amphibalanus amphitrite|GBCX3635-15||BOLD:AAO4493|KM211425  
Amphibalanus amphitrite|GBCX3644-15||BOLD:AAO4493|KM211434  
Amphibalanus amphitrite|GBCX3634-15||BOLD:AAO4493|KM211424  
Amphibalanus amphitrite|GBCX3576-15||BOLD:AAO4493|KM211366  
Amphibalanus amphitrite|GBCX3625-15||BOLD:AAO4493|KM211415  
Amphibalanus amphitrite|GBCX3652-15||BOLD:AAO4493|KM211442  
Balanidae|GBCX6671-17|United States|BOLD:AAO4493|KU204280  
Amphibalanus amphitrite|GBCX3597-15||BOLD:AAO4493|KM211387  
Amphibalanus amphitrite|GBCX7471-17|United States|BOLD:AAO4493|KU204266  
Amphibalanus amphitrite|GBCX3679-15||BOLD:AAO4493|KM211469  
Amphibalanus amphitrite|GBCX3683-15||BOLD:AAO4493|KM211473  
Amphibalanus amphitrite|GBCX3591-15||BOLD:AAO4493|KM211381  
Amphibalanus amphitrite|GBCX3595-15||BOLD:AAO4493|KM211385  
Amphibalanus amphitrite|GBCX3608-15||BOLD:AAO4493|KM211398  
Amphibalanus amphitrite|GBCX2070-14||BOLD:AAO4493|JQ035515  
Amphibalanus amphitrite|GBCX3636-15||BOLD:AAO4493|KM211426  
Amphibalanus amphitrite|GBCX3681-15||BOLD:AAO4493|KM211471  
Amphibalanus amphitrite|GBCX3699-15||BOLD:AAO4493|KM211489  
Amphibalanus amphitrite|GBCX3629-15||BOLD:AAO4493|KM211419  
Amphibalanus amphitrite|GBCX2071-14||BOLD:AAO4493|JQ035516  
Amphibalanus amphitrite|GBCX3704-15||BOLD:AAO4493|KM211494  
Amphibalanus amphitrite|GBCX3578-15||BOLD:AAO4493|KM211368  
Amphibalanus amphitrite|GBCX3605-15||BOLD:AAO4493|KM211395  
Amphibalanus amphitrite|GBCX3628-15||BOLD:AAO4493|KM211418  
Amphibalanus amphitrite|GBCX3674-15||BOLD:AAO4493|KM211464  
Amphibalanus amphitrite|GBCX3642-15||BOLD:AAO4493|KM211432  
Amphibalanus amphitrite|GBCRO5853-19|Portugal|BOLD:AAO4493|MF974279  
Amphibalanus amphitrite|GBCRO5851-19|Portugal|BOLD:AAO4493|MF974277  
Amphibalanus amphitrite|GBCRO5844-19|Portugal|BOLD:AAO4493|MF974271  
Amphibalanus amphitrite|GBCRO5846-19|Portugal|BOLD:AAO4493|MF974272  
Amphibalanus amphitrite|GBCRO5847-19|Portugal|BOLD:AAO4493|MF974273  
Amphibalanus amphitrite|GBCRO5848-19|Portugal|BOLD:AAO4493|MF974274  
Amphibalanus amphitrite|GBCRO5849-19|Portugal|BOLD:AAO4493|MF974275  
Amphibalanus amphitrite|GBCRO5850-19|Portugal|BOLD:AAO4493|MF974276  
Amphibalanus amphitrite|GBCRO5855-19|Portugal|BOLD:AAO4493|MF974281  
Amphibalanus amphitrite|GBCRO5852-19|Portugal|BOLD:AAO4493|MF974278  
Amphibalanus amphitrite|GBCRO5856-19|Portugal|BOLD:AAO4493|MF974283  
Amphibalanus amphitrite|GBCX3609-15||BOLD:AAO4493|KM211399  
Amphibalanus amphitrite|GBCX3677-15||BOLD:AAO4493|KM211467  
Amphibalanus amphitrite|GBCX3700-15||BOLD:AAO4493|KM211490  
Amphibalanus amphitrite|GBMTG3722-16||BOLD:AAO4493|NC\_024525  
Amphibalanus amphitrite|GBMNA12506-19||BOLD:AAO4493|KF588709  
Amphibalanus amphitrite|GBCX3602-15||BOLD:AAO4493|KM211392  
Amphibalanus amphitrite|GBCX3589-15||BOLD:AAO4493|KM211379  
Amphibalanus amphitrite|GBCX3600-15||BOLD:AAO4493|KM211390  
Amphibalanus amphitrite|GBCX3676-15||BOLD:AAO4493|KM211466  
Amphibalanus amphitrite|GBCX3702-15||BOLD:AAO4493|KM211492  
Amphibalanus amphitrite|GBCX3574-15||BOLD:AAO4493|KM211364  
Amphibalanus amphitrite|GBCX3651-15||BOLD:AAO4493|KM211441  
Amphibalanus amphitrite|GBCX3585-15||BOLD:AAO4493|KM211375  
Amphibalanus amphitrite|ZPC318-15|United States|BOLD:AAO4493  
Amphibalanus amphitrite|GBCX3590-15||BOLD:AAO4493|KM211380  
Amphibalanus amphitrite|GBCX3643-15||BOLD:AAO4493|KM211433  
Amphibalanus amphitrite|GBA10754-13||BOLD:AAO4493|KC138445  
Amphibalanus amphitrite|GBCX3653-15||BOLD:AAO4493|KM211443  
Amphibalanus amphitrite|GBCX3571-15||BOLD:AAO4493|KM974415  
Amphibalanus amphitrite|GBCX3680-15||BOLD:AAO4493|KM211470  
Amphibalanus amphitrite|GBCX3601-15||BOLD:AAO4493|KM211391  
Amphibalanus amphitrite|GBCX2072-14||BOLD:AAO4493|JQ035517  
Amphibalanus amphitrite|GBCX3649-15||BOLD:AAO4493|KM211439  
Amphibalanus amphitrite|GBCX3693-15||BOLD:AAO4493|KM211483  
Amphibalanus amphitrite|GBCX3696-15||BOLD:AAO4493|KM211486  
Amphibalanus amphitrite|GBCX3697-15||BOLD:AAO4493|KM211487  
Balanidae|GBCX6823-17|Guam|BOLD:AAO4493|KU204311  
Amphibalanus amphitrite|GBCX6813-17||BOLD:AAO4493|KJ663819  
Amphibalanus amphitrite|GBCX3689-15||BOLD:AAO4493|KM211479  
Amphibalanus amphitrite|GBCX3706-15||BOLD:AAO4493|KM211496  
Amphibalanus amphitrite|GBCX3624-15||BOLD:AAO4493|KM211414  
Amphibalanus amphitrite|GBCX3701-15||BOLD:AAO4493|KM211491  
Amphibalanus amphitrite|GBCX3641-15||BOLD:AAO4493|KM211431  
Amphibalanus amphitrite|GBCX3575-15||BOLD:AAO4493|KM211365  
Amphibalanus amphitrite|GBCX3610-15||BOLD:AAO4493|KM211400  
Amphibalanus amphitrite|GBCX3645-15||BOLD:AAO4493|KM211435  
Amphibalanus amphitrite|GBCX3620-15||BOLD:AAO4493|KM211410  
Amphibalanus amphitrite|GBCX3622-15||BOLD:AAO4493|KM211412  
Amphibalanus amphitrite|GBCX3618-15||BOLD:AAO4493|KM211408  
Amphibalanus amphitrite|GBCX3617-15||BOLD:AAO4493|KM211407  
Amphibalanus amphitrite|GBCX3619-15||BOLD:AAO4493|KM211409  
Amphibalanus amphitrite|GBCX3647-15||BOLD:AAO4493|KM211437  
Amphibalanus amphitrite|GBCX3616-15||BOLD:AAO4493|KM211406  
Amphibalanus amphitrite|GBCX3621-15||BOLD:AAO4493|KM211411  
Amphibalanus amphitrite|GBCX3694-15||BOLD:AAO4493|KM211484  
Amphibalanus amphitrite|GBCX3580-15||BOLD:AAO4493|KM211370  
Amphibalanus amphitrite|GBCX3650-15||BOLD:AAO4493|KM211440  
Amphibalanus amphitrite|GBCX3611-15||BOLD:AAO4493|KM211401  
Amphibalanus amphitrite|GBCX3612-15||BOLD:AAO4493|KM211402  
Amphibalanus amphitrite|GBCX3623-15||BOLD:AAO4493|KM211413  
Amphibalanus amphitrite|GBCX3613-15||BOLD:AAO4493|KM211403  
Amphibalanus amphitrite|GBCX3588-15||BOLD:AAO4493|KM211378  
Amphibalanus amphitrite|GBCX3688-15||BOLD:AAO4493|KM211478  
Amphibalanus amphitrite|GBCX3707-15||BOLD:AAO4493|KM211497  
Amphibalanus amphitrite|GBCX3615-15||BOLD:AAO4493|KM211405

Amphibalanus amphitrite|GBCX3688-15||BOLD:AAO4493|KM211478  
Amphibalanus amphitrite|GBCX3707-15||BOLD:AAO4493|KM211497  
Amphibalanus amphitrite|GBCX3615-15||BOLD:AAO4493|KM211405  
Amphibalanus amphitrite|GBCX3690-15||BOLD:AAO4493|KM211480  
Amphibalanus amphitrite|GBMNC71380-20|Indonesia|BOLD:AAO4493|MK995347  
Amphibalanus amphitrite|GBCX3584-15||BOLD:AAO4493|KM211374  
Amphibalanus amphitrite|GBCX3582-15||BOLD:AAO4493|KM211372  
Amphibalanus amphitrite|BIM837-21|Israel|BOLD:AAO4493  
Polydora cornuta|GBAN1577-07||BOLD:AAC2977|EF525282  
Polydora cornuta|GBAN1578-07||BOLD:AAC2977|EF525281  
Polydora cornuta|GBAN1579-07||BOLD:AAC2977|EF525280  
Polydora cornuta|GBAN2321-09||BOLD:AAC2976|EF525289  
Polydora cornuta|GBAN4048-13|Japan|BOLD:AAC2976|AB636156  
Polydora cornuta|GBAN4044-13|Japan|BOLD:AAC2976|AB636160  
Polydora cornuta|VAFIV092-14|United States|BOLD:AAC2976|KP254882  
Polydora cornuta|VAFIV031-14|United States|BOLD:AAC2976|KP254800  
Polydora cornuta|VAFIV101-14|United States|BOLD:AAC2976|KP254029  
Polydora cornuta|VAFIV124-14|United States|BOLD:AAC2976|KP255222  
Schizoporella japonica|GBMNB36704-20||BOLD:AED5131|MN064619  
Schizoporella japonica|QHAK180-20|Canada|BOLD:AEA1461  
Schizoporella japonica|QHAK403-20|Canada|BOLD:AEA1461  
Dendrodoris fumata|GBMLG21078-15||BOLD:ACW0162|AB917454  
Dendrodoris fumata|GBMLG21075-15||BOLD:ACW0162|AB917451  
Dendrodoris fumata|GBMLG21077-15||BOLD:ACW0162|AB917453  
Dendrodoris fumata|GBMLG21073-15||BOLD:ACW0162|AB917449  
Dendrodoris fumata|GBMLG21072-15||BOLD:ACW0162|AB917448  
Dendrodoris fumata|GBMLG21079-15||BOLD:ACW0162|AB917455  
Dendrodoris fumata|GBMLG21080-15||BOLD:ACW0162|AB917456  
Dendrodoris fumata|SIMP245-19|Singapore|BOLD:ADW3139  
Dendrodoris fumata|GBMNC24713-20|Singapore|BOLD:ADW3139|MN690567  
Dendrodoris fumata|GBMLG21074-15||BOLD:ADW3139|AB917450  
Dendrodoris fumata|GBMLG21076-15||BOLD:ADW3139|AB917452  
Dendrodoris fumata|KANBI471-19|United States|BOLD:ADW3139  
Dendrodoris fumata|KANBI868-19|United States|BOLD:ADW3139  
Dendrodoris fumata|GBMND11071-21|United States|BOLD:ADW3139|MW278338  
Dendrodoris fumata|GBMND11072-21|United States|BOLD:ADW3139|MW278039  
Dendrodoris fumata|GBML19424-19|Saudi Arabia|BOLD:ADR1982|MF958444  
Dendrodoris fumata|GBMNC24714-20|Iran|BOLD:ADR1982|MN548840  
Dendrodoris fumata|GBMND97555-21||BOLD:ADR1982|MW392739  
Dendrodoris fumata|GBMND97556-21||BOLD:ADR1982|MW402996  
Corella eumyota|ASCAN026-10|Antarctica|BOLD:AAZ1647  
Corella eumyota|GBGC16591-19||BOLD:AAB7141|MG877558  
Corella eumyota|GBGC6875-09||BOLD:AAB7141|EU140806  
Corella eumyota|GBGC6872-09||BOLD:AAB7141|EU140809  
Corella eumyota|GBGC6873-09||BOLD:AAB7141|EU140808  
Corella eumyota|GBGC6877-09||BOLD:AAB7141|EU140804  
Corella eumyota|GBGC6874-09||BOLD:AAB7141|EU140807  
Corella eumyota|GBGC6878-09||BOLD:AAB7141|EU140803  
Corella eumyota|GBGC6864-09||BOLD:AAB7141|EU140817  
Corella eumyota|GBGC6867-09||BOLD:AAB7141|EU140814  
Corella eumyota|GBGC6869-09||BOLD:AAB7141|EU140812  
Corella eumyota|GBGC6865-09||BOLD:AAB7141|EU140816  
Corella eumyota|GBGC6863-09||BOLD:AAB7141|EU140818  
Corella eumyota|GBGC6868-09||BOLD:AAB7141|EU140813  
Corella eumyota|GBGC6870-09||BOLD:AAB7141|EU140811  
Corella eumyota|GBGC6880-09||BOLD:AAB7141|EU140801  
Corella eumyota|GBGC6866-09||BOLD:AAB7141|EU140815  
Corella eumyota|GBGC6871-09||BOLD:AAB7141|EU140810  
Corella eumyota|GBGC6876-09||BOLD:AAB7141|EU140805  
Corella eumyota|GBGC6879-09||BOLD:AAB7141|EU140802  
Corella eumyota|GBGC17386-19|Australia|BOLD:AAB7141|MH339617  
Didemnum vexillum|GBMIN43679-14||BOLD:ACQ7896|KJ725154  
Didemnum vexillum|GBGC11837-13||BOLD:ACH4705|JQ663517  
Didemnum vexillum|GBGC10490-12||BOLD:AAA5282|JF738065  
Didemnum vexillum|GBGC10488-12||BOLD:AAA5282|JF738069  
Didemnum vexillum|GBGC9788-09|Japan|BOLD:AAA5282|EU742673  
Didemnum vexillum|GBGC9789-09|Japan|BOLD:AAA5282|EU742672  
Didemnum vexillum|GBGC9790-09|Japan|BOLD:AAA5282|EU742671  
Didemnum vexillum|GBGC9791-09|Japan|BOLD:AAA5282|EU742670  
Didemnum vexillum|GBGC9793-09|Japan|BOLD:AAA5282|EU742668  
Didemnum vexillum|GBGC10492-12||BOLD:AAA5282|JF738061  
Didemnum vexillum|GBGC10495-12||BOLD:AAA5282|JF738068  
Didemnum vexillum|GBGC9792-09|Japan|BOLD:AAA5282|EU742669  
Didemnum vexillum|GBGC10498-12||BOLD:AAA5282|JF738062  
Didemnum vexillum|GBGC11839-13||BOLD:AAA5282|JQ663515  
Didemnum vexillum|GBGC10496-12||BOLD:AAA5282|JF738066  
Didemnum vexillum|GBGC10491-12||BOLD:AAA5282|JF738063  
Didemnum vexillum|GBGC10497-12||BOLD:AAA5282|JF738064  
Didemnum vexillum|GBGC11840-13||BOLD:AAA5282|JQ663514  
Didemnum vexillum|GBGC11841-13||BOLD:AAA5282|JQ663513  
Didemnum vexillum|GBGC10489-12||BOLD:AAA5282|JF738067  
Didemnum vexillum|GBGC11842-13||BOLD:AAA5282|JQ663512  
Didemnum vexillum|GBMNB56769-20|Japan|BOLD:AAA5282|MN071419  
Didemnum vexillum|GBMNB56770-20|Japan|BOLD:AAA5282|MN071420  
Didemnum vexillum|GBMNB56767-20|Japan|BOLD:AAA5281|MN071417  
Didemnum vexillum|GBMND3324-21||BOLD:AEH7841|MW425666  
Didemnum vexillum|GBMND3318-21||BOLD:AEH7841|MW425660  
Didemnum vexillum|GBMND3317-21||BOLD:AEH7841|MW425659  
Didemnum vexillum|GBGC11845-13||BOLD:AEH7841|JQ663509  
Didemnum vexillum|GBGC13226-17|United Kingdom|BOLD:AEH7841|KR612221  
Didemnum vexillum|GBGC13816-19|United Kingdom|BOLD:AEH7841|KR612222  
Didemnum vexillum|GBMND3323-21||BOLD:AEH7841|MW425665  
Didemnum vexillum|GBGC13460-17|United Kingdom|BOLD:AEH7841|KR612219  
Didemnum vexillum|GBMND3313-21||BOLD:AEH7841|MW425655  
Didemnum vexillum|GBMND3299-21||BOLD:AEH7841|MW425641  
Didemnum vexillum|GBMND3305-21||BOLD:AEH7841|MW425647  
Didemnum vexillum|GBMND3301-21||BOLD:AEH7841|MW425643  
Didemnum vexillum|GBMND3300-21||BOLD:AEH7841|MW425642  
Didemnum vexillum|GBGC9847-09|United States|BOLD:AEH7841|EU419413  
Didemnum vexillum|GBGC9848-09|United States|BOLD:AEH7841|EU419412  
Didemnum vexillum|GBMND3311-21||BOLD:AEH7841|MW425653  
Didemnum vexillum|GBGC9849-09|United States|BOLD:AEH7841|EU419414

Didemnum vexillum|GBGC9847-09|United States|BOLD:AEH7841|EU419412  
Didemnum vexillum|GBGC9848-09|United States|BOLD:AEH7841|EU419412  
Didemnum vexillum|GBMND3311-21||BOLD:AEH7841|MW425653  
Didemnum vexillum|GBMND3298-21||BOLD:AEH7841|MW425640  
Didemnum vexillum|GBGC10494-12||BOLD:AEH7841|JF738057  
Didemnum vexillum|GBGC9834-09|France|BOLD:AEH7841|EU419426  
Didemnum vexillum|GBGC9833-09|France|BOLD:AEH7841|EU419427  
Didemnum vexillum|GBGC9824-09|United States|BOLD:AEH7841|EU419436  
Didemnum vexillum|GBGC9803-09|Japan|BOLD:AEH7841|EU419457  
Didemnum vexillum|GBMND3309-21||BOLD:AEH7841|MW425651  
Didemnum vexillum|GBGC13753-19|United States|BOLD:AEH7841|KY235546  
Didemnum vexillum|GBMND3312-21||BOLD:AEH7841|MW425654  
Didemnum vexillum|GBGC13297-17|United Kingdom|BOLD:AEH7841|KR612220  
Didemnum vexillum|GBMND3326-21||BOLD:AEH7841|MW425668  
Didemnum vexillum|GBMND3327-21||BOLD:AEH7841|MW425669  
Didemnum vexillum|GBMTG4021-16||BOLD:AAA5281|NC\_026107  
Didemnum vexillum|GBMNA11955-19|Japan|BOLD:AAA5281|KM259616  
Didemnum vexillum|GBMND3302-21||BOLD:AAA5281|MW425644  
Didemnum vexillum|GBMND33279-21||BOLD:AAA5281|MW425621  
Didemnum vexillum|GBMND3322-21||BOLD:AAA5281|MW425664  
Didemnum vexillum|GBMND3330-21||BOLD:AAA5281|MW425672  
Didemnum vexillum|GBMND3314-21||BOLD:AAA5281|MW425656  
Didemnum vexillum|GBMND3304-21||BOLD:AAA5281|MW425646  
Didemnum vexillum|GBMND3289-21||BOLD:AAA5281|MW425631  
Didemnum vexillum|GBMND3316-21||BOLD:AAA5281|MW425658  
Didemnum vexillum|GBMND3320-21||BOLD:AAA5281|MW425662  
Didemnum vexillum|GBMND3321-21||BOLD:AAA5281|MW425663  
Didemnum vexillum|GBGC9796-09|United States|BOLD:AAA5281|EU742665  
Didemnum vexillum|GBGC9802-09|Japan|BOLD:AAA5281|EU419458  
Didemnum vexillum|GBGC11844-13||BOLD:AAA5281|JQ663510  
Didemnum vexillum|GBGC11843-13||BOLD:AAA5281|JQ663511  
Didemnum vexillum|GBGC9801-09|Japan|BOLD:AAA5281|EU419459  
Didemnum vexillum|GBGC11838-13||BOLD:AAA5281|JQ663516  
Didemnum vexillum|GBGC9854-09|Canada|BOLD:AAA5281|EU419406  
Didemnum vexillum|GBGC13799-19|United States|BOLD:AAA5281|KY235547  
Didemnum vexillum|GBGC9819-09|Canada|BOLD:AAA5281|EU419441  
Didemnum vexillum|GBGC9825-09|Japan|BOLD:AAA5281|EU419435  
Didemnum vexillum|GBGC10499-12||BOLD:AAA5281|JF738060  
Didemnum vexillum|GBGC13453-17|United Kingdom|BOLD:AAA5281|KR612218  
Didemnum vexillum|GBGC10493-12||BOLD:AAA5281|JF738059  
Didemnum vexillum|GBGC9837-09|France|BOLD:AAA5281|EU419423  
Didemnum vexillum|GBGC9836-09|France|BOLD:AAA5281|EU419424  
Didemnum vexillum|GBGC9826-09|Japan|BOLD:AAA5281|EU419434  
Didemnum vexillum|GBGC9795-09|United States|BOLD:AAA5281|EU742666  
Didemnum vexillum|GBGC9797-09|United States|BOLD:AAA5281|EU742664  
Didemnum vexillum|GBGC9810-09|United States|BOLD:AAA5281|EU419450  
Didemnum vexillum|GBGC9831-09|New Zealand|BOLD:AAA5281|EU419429  
Didemnum vexillum|GBGC9838-09|United States|BOLD:AAA5281|EU419422  
Didemnum vexillum|GBGC11846-13||BOLD:AAA5281|JQ663508  
Didemnum vexillum|GBGC13256-17|United Kingdom|BOLD:AAA5281|KR612210  
Didemnum vexillum|GBMND3315-21||BOLD:AAA5281|MW425657  
Didemnum vexillum|GBMND3291-21||BOLD:AAA5281|MW425633  
Didemnum vexillum|GBGC9823-09|United States|BOLD:AAA5281|EU419437  
Didemnum vexillum|GBMND3292-21||BOLD:AAA5281|MW425634  
Didemnum vexillum|GBMND3296-21||BOLD:AAA5281|MW425638  
Didemnum vexillum|GBMND3310-21||BOLD:AAA5281|MW425652  
Didemnum vexillum|GBGC13320-17|United Kingdom|BOLD:AAA5281|KR612215  
Didemnum vexillum|GBGC13304-17|United Kingdom|BOLD:AAA5281|KR612212  
Didemnum vexillum|GBGC13187-17|United Kingdom|BOLD:AAA5281|KR612214  
Didemnum vexillum|GBMND3307-21||BOLD:AAA5281|MW425649  
Didemnum vexillum|GBGC9786-09|United States|BOLD:AAA5281|EU742675  
Didemnum vexillum|GBGC9798-09|United States|BOLD:AAA5281|EU742663  
Didemnum vexillum|GBGC9856-09|United States|BOLD:AAA5281|EU419404  
Didemnum vexillum|GBGC9827-09|United States|BOLD:AAA5281|EU419433  
Didemnum vexillum|GBGC14367-19||BOLD:AAA5281|MG833034  
Didemnum vexillum|GBGC13849-19|United Kingdom|BOLD:AAA5281|KR612216  
Didemnum vexillum|OZIMP002-15|New Zealand|BOLD:AAA5281  
Didemnum vexillum|GBGC10500-12||BOLD:AAA5281|JF738058  
Didemnum vexillum|GBGC9859-09|Japan|BOLD:AAA5281|EU419401  
Didemnum vexillum|GBGC9858-09|United States|BOLD:AAA5281|EU419402  
Didemnum vexillum|GBGC9857-09|France|BOLD:AAA5281|EU419403  
Didemnum vexillum|GBGC9855-09|New Zealand|BOLD:AAA5281|EU419405  
Didemnum vexillum|GBGC9851-09|France|BOLD:AAA5281|EU419409  
Didemnum vexillum|GBGC9850-09|United States|BOLD:AAA5281|EU419410  
Didemnum vexillum|GBGC9849-09|United States|BOLD:AAA5281|EU419411  
Didemnum vexillum|GBGC9846-09|United States|BOLD:AAA5281|EU419414  
Didemnum vexillum|GBGC9845-09|Netherlands|BOLD:AAA5281|EU419415  
Didemnum vexillum|GBGC9844-09|Ireland|BOLD:AAA5281|EU419416  
Didemnum vexillum|GBGC9843-09|United States|BOLD:AAA5281|EU419417  
Didemnum vexillum|GBGC9842-09|United States|BOLD:AAA5281|EU419418  
Didemnum vexillum|GBGC9841-09|United States|BOLD:AAA5281|EU419419  
Didemnum vexillum|GBGC9840-09|United States|BOLD:AAA5281|EU419420  
Didemnum vexillum|GBGC9839-09|New Zealand|BOLD:AAA5281|EU419421  
Didemnum vexillum|GBGC9835-09|France|BOLD:AAA5281|EU419425  
Didemnum vexillum|GBGC9832-09|New Zealand|BOLD:AAA5281|EU419428  
Didemnum vexillum|GBGC9830-09|France|BOLD:AAA5281|EU419430  
Didemnum vexillum|GBGC9829-09|United States|BOLD:AAA5281|EU419431  
Didemnum vexillum|GBGC9821-09|United States|BOLD:AAA5281|EU419439  
Didemnum vexillum|GBGC9818-09|United States|BOLD:AAA5281|EU419442  
Didemnum vexillum|GBGC9817-09|United States|BOLD:AAA5281|EU419443  
Didemnum vexillum|GBGC9816-09|United States|BOLD:AAA5281|EU419444  
Didemnum vexillum|GBGC9815-09|United States|BOLD:AAA5281|EU419445  
Didemnum vexillum|GBGC9814-09|United States|BOLD:AAA5281|EU419446  
Didemnum vexillum|GBGC9813-09|United States|BOLD:AAA5281|EU419447  
Didemnum vexillum|GBGC9811-09|United States|BOLD:AAA5281|EU419449  
Didemnum vexillum|GBGC9809-09|United States|BOLD:AAA5281|EU419451  
Didemnum vexillum|GBGC9808-09|United States|BOLD:AAA5281|EU419452  
Didemnum vexillum|GBGC9807-09|United States|BOLD:AAA5281|EU419453  
Didemnum vexillum|GBGC9806-09|United States|BOLD:AAA5281|EU419454  
Didemnum vexillum|GBGC9805-09|United States|BOLD:AAA5281|EU419455  
Didemnum vexillum|GBGC9799-09|United States|BOLD:AAA5281|EU742662  
Didemnum vexillum|GBGC9794-09|Japan|BOLD:AAA5281|EU742667

Didemnum vexillum|GBGC9805-09|United States|BOLD:AAA5281|EU419455  
Didemnum vexillum|GBGC9799-09|United States|BOLD:AAA5281|EU742662  
Didemnum vexillum|GBGC9794-09|Japan|BOLD:AAA5281|EU742667  
Didemnum vexillum|GBGC9787-09|United States|BOLD:AAA5281|EU742674  
Didemnum vexillum|GBGC9785-09|New Zealand|BOLD:AAA5281|EU742676  
Didemnum vexillum|GBGC9784-09|New Zealand|BOLD:AAA5281|EU742677  
Didemnum vexillum|GBGC9812-09|United States|BOLD:AAA5281|EU419448  
Didemnum vexillum|GBGC13255-17|United Kingdom|BOLD:AAA5281|KR612209  
Didemnum vexillum|GBMND3308-21|BOLD:AAA5281|MW425650  
Didemnum vexillum|GBMND3294-21|BOLD:AAA5281|MW425636  
Didemnum vexillum|GBGC13473-17|United Kingdom|BOLD:AAA5281|KR612213  
Didemnum vexillum|GBGC9822-09|United States|BOLD:AAA5281|EU419438  
Didemnum vexillum|GBMND3287-21|BOLD:AAA5281|MW425629  
Didemnum vexillum|GBMND3306-21|BOLD:AAA5281|MW425648  
Didemnum vexillum|GBGC9820-09|United States|BOLD:AAA5281|EU419440  
Didemnum vexillum|GBGC13388-17|United Kingdom|BOLD:AAA5281|KR612217  
Didemnum vexillum|GBGC13781-19|United Kingdom|BOLD:AAA5281|KR612211  
Didemnum vexillum|GBMNB56771-20|Canada|BOLD:AAA5281|MN718181  
Didemnum vexillum|GBMND3268-21|BOLD:AAA5281|MN952980  
Didemnum vexillum|GBMND3269-21|BOLD:AAA5281|MN952979  
Didemnum vexillum|GBMND3328-21|BOLD:AAA5281|MW425670  
Didemnum vexillum|GBMND3331-21|BOLD:AAA5281|MW425673  
Didemnum vexillum|GBMND3332-21|BOLD:AAA5281|MW425674  
Distaplia bermudensis|GBGC13710-19|United States|BOLD:ADX4769|KY111419  
Distaplia bermudensis|GBMND72062-21|United States|BOLD:ADX4769|MT572332  
Distaplia bermudensis|GBGC14372-19|United States|BOLD:ADX4769|MG525013  
Distaplia bermudensis|GBGC14381-19|United States|BOLD:ADX4769|MG525009  
Distaplia bermudensis|GBGC14377-19|United States|BOLD:ADX4769|MG525007  
Distaplia bermudensis|GBGC14378-19|United States|BOLD:ADX4769|MG525008  
Distaplia bermudensis|GBGC14374-19|United States|BOLD:ADX4769|MG525006  
Distaplia bermudensis|GBGC14379-19|United States|BOLD:ADX4769|MG525010  
Distaplia bermudensis|GBGC14380-19|United States|BOLD:ADX4769|MG525011  
Distaplia bermudensis|GBGC14376-19|United States|BOLD:ADX4769|MG525015  
Distaplia bermudensis|GBGC14375-19|United States|BOLD:ADX4769|MG525014  
Distaplia bermudensis|GBGC14373-19|United States|BOLD:ADX4769|MG525012  
Distaplia bermudensis|GBMND72061-21|United States|BOLD:ADX4769|MT572331  
Distaplia bermudensis|GBMND72063-21|United States|BOLD:ADX4769|MT572333  
Distaplia bermudensis|GBMND72064-21|United States|BOLD:ADX4769|MT572334  
Distaplia bermudensis|GBMND72065-21|United States|BOLD:ADX4769|MT572335  
Distaplia bermudensis|GBMND72070-21|United States|BOLD:ADX4769|MT572340  
Distaplia bermudensis|GBMND72068-21|United States|BOLD:ADM3810|MT572338  
Distaplia bermudensis|GBMND72069-21|United States|BOLD:ADM3810|MT572339  
Distaplia bermudensis|GBMND72066-21|United States|BOLD:ADM3810|MT572336  
Distaplia bermudensis|GBMND72067-21|United States|BOLD:ADM3810|MT572337  
Distaplia bermudensis|GBMND72071-21|United States|BOLD:ADM3810|MT572341  
Symplegma brakenhielmi|ICASC023-16|India|BOLD:ADC1856  
Symplegma brakenhielmi|GBGC14120-19|India|BOLD:ADC1856|KR815818  
Clavelina lepadiformis|GBMIN43045-14|Spain|BOLD:ACQ8023|KF309638  
Clavelina lepadiformis|GBMNA11954-19|BOLD:AAE2490|FJ839918  
Clavelina lepadiformis|GBMTG1597-16|BOLD:AAE2490|NC\_012887  
Clavelina lepadiformis|GBGC0987-06|BOLD:AAE2490|AY603104  
Clavelina lepadiformis|GBMIN42971-14|Spain|BOLD:AAE2490|KF309563  
Clavelina lepadiformis|GBMNE35355-21|BOLD:AAE2490|MZ882309  
Clavelina lepadiformis|GBMNE35354-21|BOLD:AAE2490|MZ882308  
Clavelina lepadiformis|GBGC3967-07|BOLD:AAE2490|AY211529  
Clavelina lepadiformis|GBGC13579-19|United States|BOLD:AAE2490|HM012482  
Clavelina lepadiformis|GBGC13580-19|United States|BOLD:AAE2490|HM012483  
Clavelina lepadiformis|GBMNE35356-21|BOLD:AAE2490|MZ882311  
Clavelina lepadiformis|GBMNE35358-21|BOLD:AAE2490|MZ882307  
Perophora multiclathrata|ICASC086-16|India|BOLD:ADD9010  
Perophora multiclathrata|GBGC13765-19|India|BOLD:ADD6318|KU667280  
Perophora multiclathrata|GBGC13723-19|India|BOLD:ADD6318|KU667276  
Perophora multiclathrata|ICASC084-16|India|BOLD:ADD6318  
Perophora multiclathrata|ICASC198-16|India|BOLD:ADD6318  
Perophora multiclathrata|GBGC13275-17|BOLD:ADD6318|KU360801  
Perophora multiclathrata|ICASC054-16|India|BOLD:ADD6318  
Perophora multiclathrata|GBGC13750-19|India|BOLD:ADD6318|KU220956  
Perophora multiclathrata|GBGC13940-19|India|BOLD:ADD6318|KU667277  
Perophora multiclathrata|GBGC13939-19|India|BOLD:ADD6318|KU220958  
Perophora multiclathrata|ICASC085-16|India|BOLD:ADD6318  
Perophora multiclathrata|ICASC058-16|India|BOLD:ADD6318  
Perophora multiclathrata|GBGC13726-19|India|BOLD:ADD6318|KT276225  
Perophora multiclathrata|ICASC036-16|India|BOLD:ADD6318  
Perophora multiclathrata|ICASC047-16|India|BOLD:ADD6318  
Perophora multiclathrata|GBGC13918-19|India|BOLD:ADD6318|KT693196  
Perophora multiclathrata|ICASC048-16|India|BOLD:ADD6318  
Perophora multiclathrata|GBGC13980-19|India|BOLD:ADD6318|KT693197  
Perophora japonica|GBGC11156-13|BOLD:AED7128|JQ863390  
Perophora japonica|GBMNB56776-20|BOLD:AED7128|MN064601  
Perophora japonica|GBMNB56777-20|BOLD:AED7128|MN064600  
Perophora japonica|GBMND72157-21|United States|BOLD:AEK6489|MW872302  
Asciidiella aspersa|GBMIN43688-14|BOLD:ACQ6971|KJ725163  
Asciidiella aspersa|GBGC13555-19|Spain|BOLD:ACB6347|KF309594  
Asciidiella aspersa|GBMND3361-21|Japan|BOLD:ACB6346|LC547006  
Asciidiella aspersa|GBGC10503-12|South Korea|BOLD:ACB6346|JQ742948  
Asciidiella aspersa|GBMND72132-21|United States|BOLD:ACB6346|MW872314  
Asciidiella aspersa|GBMNE35406-21|BOLD:ACB6346|MZ782798  
Asciidiella aspersa|GBMIN43013-14|Spain|BOLD:ACB6347|KF309606  
Asciidiella aspersa|GBMIN43456-14|United States|BOLD:ACB6347|KF886702  
Asciidiella aspersa|GBMND72129-21|United States|BOLD:ACB6347|MW872260  
Asciidiella aspersa|GBMND72135-21|United States|BOLD:ACB6347|MW872313  
Asciidiella aspersa|GBMTG3323-16|BOLD:ACB6347|NC\_021469  
Asciidiella aspersa|GBMNA11957-19|Italy|BOLD:ACB6347|HF548561  
Asciidiella aspersa|GBMND72130-21|United States|BOLD:ACB6347|MW872267  
Asciidiella aspersa|GBMND72136-21|United States|BOLD:ACB6347|MW872271  
Asciidiella aspersa|GBMND72133-21|United States|BOLD:ACB6347|MW872272  
Asciidiella aspersa|GBMND72137-21|United States|BOLD:ACB6347|MW872258  
Asciidiella aspersa|GBMND72138-21|United States|BOLD:ACB6347|MW872277  
Asciidiella aspersa|GBMND72134-21|United States|BOLD:ACB6347|MW872276  
Asciidiella aspersa|GBMIN42942-14|Spain|BOLD:ACB6347|KF309534  
Asciidiella aspersa|GBMIN42976-14|Spain|BOLD:ACB6347|KF309568  
Asciidiella aspersa|GBMNR56757-20|BOLD:ACB6347|MN064595

Asciidiella aspersa|GBMIN42942-14|Spain|BOLD:ACB6347|KF309534  
Asciidiella aspersa|GBMIN42976-14|Spain|BOLD:ACB6347|KF309568  
Asciidiella aspersa|GBMNB56757-20||BOLD:ACB6347|MN064595  
Asciidiella aspersa|GBGC13512-19|Japan|BOLD:ACB6347|AB794913  
Asciidiella aspersa|GBGC13554-19|Sweden|BOLD:ACB6347|AB794955  
Asciidiella aspersa|GBMIN43060-14|Spain|BOLD:ACB6347|KF309653  
Asciidiella aspersa|GBGC13146-17|Sweden|BOLD:ACB6347|KU647829  
Asciidiella aspersa|GBGC13519-19|Spain|BOLD:ACB6347|AB794920  
Asciidiella aspersa|GBGC13520-19|Spain|BOLD:ACB6347|AB794921  
Asciidiella aspersa|GBGC13529-19|Spain|BOLD:ACB6347|AB794930  
Asciidiella aspersa|GBGC13531-19|Spain|BOLD:ACB6347|AB794932  
Asciidiella aspersa|GBGC13532-19|Spain|BOLD:ACB6347|AB794933  
Asciidiella aspersa|GBGC13534-19|Spain|BOLD:ACB6347|AB794935  
Asciidiella aspersa|GBGC13540-19|Spain|BOLD:ACB6347|AB794941  
Asciidiella aspersa|GBMIN42963-14|Spain|BOLD:ACB6347|KF309555  
Asciidiella aspersa|GBMIN42941-14|Spain|BOLD:ACB6347|KF309533  
Asciidiella aspersa|GBGC13536-19|Spain|BOLD:ACB6347|AB794937  
Asciidiella aspersa|GBMIN43044-14|Spain|BOLD:ACB6347|KF309637  
Asciidiella aspersa|GBMIN43024-14|Spain|BOLD:ACB6347|KF309617  
Asciidiella aspersa|GBMIN42970-14|Spain|BOLD:ACB6347|KF309562  
Asciidiella aspersa|GBMIN43038-14|Spain|BOLD:ACB6347|KF309631  
Asciidiella aspersa|GBGC13513-19|Japan|BOLD:ACB6347|AB794914  
Asciidiella aspersa|GBGC13518-19|Japan|BOLD:ACB6347|AB794919  
Asciidiella aspersa|GBGC13522-19|Spain|BOLD:ACB6347|AB794923  
Asciidiella aspersa|GBGC13526-19|Spain|BOLD:ACB6347|AB794927  
Asciidiella aspersa|GBGC13525-19|Spain|BOLD:ACB6347|AB794926  
Asciidiella aspersa|GBGC13535-19|Spain|BOLD:ACB6347|AB794936  
Asciidiella aspersa|GBGC13539-19|Spain|BOLD:ACB6347|AB794940  
Asciidiella aspersa|GBGC13552-19|United Kingdom|BOLD:ACB6347|AB794953  
Asciidiella aspersa|GBGC13546-19|United Kingdom|BOLD:ACB6347|AB794947  
Asciidiella aspersa|GBGC13544-19|United Kingdom|BOLD:ACB6347|AB794945  
Asciidiella aspersa|GBGC13516-19|Japan|BOLD:ACB6347|AB794917  
Asciidiella aspersa|GBGC13335-17|Spain|BOLD:ACB6347|KU695283  
Asciidiella aspersa|GBGC13551-19|United Kingdom|BOLD:ACB6347|AB794952  
Asciidiella aspersa|GBGC13553-19|Sweden|BOLD:ACB6347|AB794954  
Asciidiella aspersa|GBMNB56756-20|Canada|BOLD:ACB6347|MN718193  
Asciidiella aspersa|GBMIN43068-14|Spain|BOLD:ACB6347|KF309661  
Asciidiella aspersa|GBGC13521-19|Spain|BOLD:ACB6347|AB794922  
Asciidiella aspersa|GBGC13523-19|Spain|BOLD:ACB6347|AB794924  
Asciidiella aspersa|GBGC13527-19|Spain|BOLD:ACB6347|AB794928  
Asciidiella aspersa|GBGC13528-19|Spain|BOLD:ACB6347|AB794929  
Asciidiella aspersa|GBGC13533-19|Spain|BOLD:ACB6347|AB794934  
Asciidiella aspersa|GBMIN42967-14|Spain|BOLD:ACB6347|KF309559  
Asciidiella aspersa|GBGC13537-19|Spain|BOLD:ACB6347|AB794938  
Asciidiella aspersa|GBGC13530-19|Spain|BOLD:ACB6347|AB794931  
Asciidiella aspersa|GBGC13524-19|Spain|BOLD:ACB6347|AB794925  
Asciidiella aspersa|GBGC13517-19|Japan|BOLD:ACB6347|AB794918  
Asciidiella aspersa|GBGC13515-19|Japan|BOLD:ACB6347|AB794916  
Asciidiella aspersa|GBGC13514-19|Japan|BOLD:ACB6347|AB794915  
Asciidiella aspersa|GBGC13511-19|Japan|BOLD:ACB6347|AB794912  
Asciidiella aspersa|GBGC13538-19|Spain|BOLD:ACB6347|AB794939  
Asciidiella aspersa|GBGC13541-19|United Kingdom|BOLD:ACB6347|AB794942  
Asciidiella aspersa|GBGC13542-19|United Kingdom|BOLD:ACB6347|AB794943  
Asciidiella aspersa|GBGC13543-19|United Kingdom|BOLD:ACB6347|AB794944  
Asciidiella aspersa|GBGC13545-19|United Kingdom|BOLD:ACB6347|AB794946  
Asciidiella aspersa|GBGC13547-19|United Kingdom|BOLD:ACB6347|AB794948  
Asciidiella aspersa|GBGC13548-19|United Kingdom|BOLD:ACB6347|AB794949  
Asciidiella aspersa|GBGC13549-19|United Kingdom|BOLD:ACB6347|AB794950  
Asciidiella aspersa|GBGC13550-19|United Kingdom|BOLD:ACB6347|AB794951  
Asciidiella aspersa|GBMND3362-21|Japan|BOLD:ACB6347|LC547007  
Asciidiella aspersa|GBMNB56758-20||BOLD:ACB6347|MN064594  
Asciidiella aspersa|GBGC10504-12|South Korea|BOLD:ACB6347|JQ742949  
Asciidiella aspersa|GBMND72131-21|United States|BOLD:ACB6347|MW872307  
Asciidiella aspersa|GBMNE35407-21||BOLD:ACB6347|MZ782797  
Microcosmus squamiger|ICASC019-16|India|BOLD:ACQ6418  
Microcosmus squamiger|GBMIN43696-14|India|BOLD:ACQ6418|KJ944390  
Microcosmus squamiger|GBGC14465-19|India|BOLD:ACQ6418|MH757090  
Microcosmus squamiger|GBGC14138-19|India|BOLD:ACQ6418|KR996795  
Microcosmus squamiger|ICASC013-16|India|BOLD:ACQ6418  
Microcosmus squamiger|GBGC14464-19|India|BOLD:ACQ6418|MH757089  
Microcosmus squamiger|GBGC14462-19|India|BOLD:ACQ6418|MH757088  
Microcosmus squamiger|GBGC14460-19|India|BOLD:ACQ6418|MH746961  
Microcosmus squamiger|GBGC14458-19|India|BOLD:ACQ6418|MH757086  
Microcosmus squamiger|GBGC14459-19|India|BOLD:ACQ6418|MH746959  
Microcosmus squamiger|GBGC14461-19|India|BOLD:ACQ6418|MH757087  
Microcosmus squamiger|GBGC14463-19|India|BOLD:ACQ6418|MH746960  
Microcosmus squamiger|GBGC14466-19|India|BOLD:ACQ6418|MH746962  
Microcosmus squamiger|GBGC14467-19|India|BOLD:ACQ6418|MH746963  
Symplegma brakenhielmi|GBGC14096-19|India|BOLD:AE9173|KT276224  
Symplegma brakenhielmi|ICASC032-16|India|BOLD:AE9173  
Symplegma brakenhielmi|ICASC134-16|India|BOLD:ADD4292  
Symplegma brakenhielmi|GBGC14137-19|India|BOLD:ADD4292|KX138510  
Symplegma brakenhielmi|GBGC14136-19|India|BOLD:AE9173|KT276228  
Symplegma brakenhielmi|ICASC040-16|India|BOLD:AE9173  
Symplegma brakenhielmi|GBGC14112-19|BOLD:AE9173|KU360802  
Symplegma brakenhielmi|ICASC199-16|India|BOLD:AE9173  
Symplegma brakenhielmi|GBGC14513-19|India|BOLD:AE9173|MH729324  
Symplegma brakenhielmi|GBGC14512-19|India|BOLD:AE9173|MH729322  
Symplegma brakenhielmi|GBGC14514-19|India|BOLD:AE9173|MH729325  
Symplegma brakenhielmi|GBGC15782-19|Italy|BOLD:AE9173|LS992554  
Symplegma brakenhielmi|GBMNB56868-20|Panama|BOLD:AED1305|MT232734  
Microcosmus squamiger|GBMIN43088-14||BOLD:ACQ6419|KF414703  
Microcosmus squamiger|GBMIN43090-14||BOLD:ACQ6419|KF414707  
Microcosmus squamiger|GBMIN43087-14||BOLD:AAA1576|KF414699  
Microcosmus squamiger|GBGC6377-09||BOLD:AAA1576|FJ528603  
Microcosmus squamiger|GBGC6378-09||BOLD:AAA1576|FJ528602  
Microcosmus squamiger|GBMNE35422-21||BOLD:AAA1576|MZ882320  
Microcosmus squamiger|GBMNE35427-21||BOLD:AAA1576|MZ882323  
Microcosmus squamiger|GBMNE35436-21||BOLD:AAA1576|MZ882333  
Microcosmus squamiger|GBMNE35425-21||BOLD:AAA1576|MZ882318  
Microcosmus squamiger|GBMNE35433-21||BOLD:AAA1576|MZ882330

Microcosmus squamiger|GBMNE35430-21||BOLD:AAA1576|MZ882330  
Microcosmus squamiger|GBMNE35425-21||BOLD:AAA1576|MZ882318  
Microcosmus squamiger|GBMNE35433-21||BOLD:AAA1576|MZ882330  
Microcosmus squamiger|GBMNE35431-21||BOLD:AAA1576|MZ882322  
Microcosmus squamiger|GBMIN43007-14|Spain|BOLD:AAA1576|KF309600  
Microcosmus squamiger|GBMNE35434-21||BOLD:AAA1576|MZ882331  
Microcosmus squamiger|LOBO018-12|Portugal|BOLD:AAA1576|KF369151  
Microcosmus squamiger|GBGC11834-13||BOLD:AAA1576|JQ815438  
Microcosmus squamiger|GBGC3682-07||BOLD:AAA1576|AM709502  
Microcosmus squamiger|GBGC3683-07|Spain|BOLD:AAA1576|AM706490  
Microcosmus squamiger|GBGC6379-09||BOLD:AAA1576|FJ528601  
Microcosmus squamiger|GBGC13287-17|Spain|BOLD:AAA1576|KU697730  
Microcosmus squamiger|GBGC13466-17|Spain|BOLD:AAA1576|KU697729  
Microcosmus squamiger|GBMNE35419-21||BOLD:AAA1576|MZ882325  
Microcosmus squamiger|GBMNE35420-21||BOLD:AAA1576|MZ882326  
Microcosmus squamiger|GBMNE35426-21||BOLD:AAA1576|MZ882313  
Microcosmus squamiger|GBMNE35432-21||BOLD:AAA1576|MZ882324  
Microcosmus squamiger|GBMNE35439-21||BOLD:AAA1576|MZ882335  
Microcosmus squamiger|GBMNE35423-21||BOLD:AAA1576|MZ882321  
Microcosmus squamiger|GBMNE35437-21||BOLD:AAA1576|MZ882329  
Microcosmus squamiger|GBGC11835-13||BOLD:AAA1576|JQ815437  
Microcosmus squamiger|GBMNE35424-21||BOLD:AAA1576|MZ882314  
Microcosmus squamiger|GBMNE35435-21||BOLD:AAA1576|MZ882332  
Microcosmus squamiger|GBGC11836-13||BOLD:AAA1576|JQ815436  
Microcosmus squamiger|GBMNE35428-21||BOLD:AAA1576|MZ882327  
Microcosmus squamiger|GBMNE35429-21||BOLD:AAA1576|MZ882328  
Microcosmus squamiger|GBGC11833-13||BOLD:AAA1576|JQ815439  
Microcosmus squamiger|GBGC6168-08||BOLD:AAA1576|EU486179  
Microcosmus squamiger|GBMIN43002-14|Spain|BOLD:AAA1576|KF309595  
Microcosmus squamiger|GBMNC58873-20|Spain|BOLD:AAA1576|MN185354  
Microcosmus squamiger|GBGC6041-08||BOLD:AAA1576|EU486306  
Microcosmus squamiger|GBGC5920-08||BOLD:AAA1576|EU486427  
Microcosmus squamiger|GBGC5997-08||BOLD:AAA1576|EU486350  
Microcosmus squamiger|GBGC5999-08||BOLD:AAA1576|EU486348  
Microcosmus squamiger|GBGC6001-08||BOLD:AAA1576|EU486346  
Microcosmus squamiger|GBGC6007-08||BOLD:AAA1576|EU486340  
Microcosmus squamiger|GBGC6019-08||BOLD:AAA1576|EU486328  
Microcosmus squamiger|GBGC6020-08||BOLD:AAA1576|EU486327  
Microcosmus squamiger|GBGC6026-08||BOLD:AAA1576|EU486321  
Microcosmus squamiger|GBGC6043-08||BOLD:AAA1576|EU486304  
Microcosmus squamiger|GBGC6047-08||BOLD:AAA1576|EU486300  
Microcosmus squamiger|GBGC6065-08||BOLD:AAA1576|EU486282  
Microcosmus squamiger|GBGC6103-08||BOLD:AAA1576|EU486244  
Microcosmus squamiger|GBGC6106-08||BOLD:AAA1576|EU486241  
Microcosmus squamiger|GBGC6107-08||BOLD:AAA1576|EU486240  
Microcosmus squamiger|GBMIN43026-14|Spain|BOLD:AAA1576|KF309619  
Microcosmus squamiger|GBGC6173-08||BOLD:AAA1576|EU486174  
Microcosmus squamiger|GBGC6157-08||BOLD:AAA1576|EU486190  
Microcosmus squamiger|GBGC6044-08||BOLD:AAA1576|EU486303  
Microcosmus squamiger|GBGC6053-08||BOLD:AAA1576|EU486294  
Microcosmus squamiger|GBGC5918-08||BOLD:AAA1576|EU486429  
Microcosmus squamiger|GBGC5973-08||BOLD:AAA1576|EU486374  
Microcosmus squamiger|GBGC5990-08||BOLD:AAA1576|EU486357  
Microcosmus squamiger|GBGC6002-08||BOLD:AAA1576|EU486345  
Microcosmus squamiger|GBGC6099-08||BOLD:AAA1576|EU486248  
Microcosmus squamiger|GBGC6143-08||BOLD:AAA1576|EU486204  
Microcosmus squamiger|GBGC6078-08||BOLD:AAA1576|EU486269  
Microcosmus squamiger|GBGC6082-08||BOLD:AAA1576|EU486265  
Microcosmus squamiger|GBGC6163-08||BOLD:AAA1576|EU486184  
Microcosmus squamiger|GBMIN43056-14|Spain|BOLD:AAA1576|KF309649  
Microcosmus squamiger|GBGC5945-08||BOLD:AAA1576|EU486402  
Microcosmus squamiger|GBGC6162-08||BOLD:AAA1576|EU486185  
Microcosmus squamiger|GBGC5933-08||BOLD:AAA1576|EU486414  
Microcosmus squamiger|GBGC6036-08||BOLD:AAA1576|EU486311  
Microcosmus squamiger|GBGC6150-08||BOLD:AAA1576|EU486197  
Microcosmus squamiger|GBMIN43059-14|Spain|BOLD:AAA1576|KF309652  
Microcosmus squamiger|GBGC5947-08||BOLD:AAA1576|EU486400  
Microcosmus squamiger|GBGC5948-08||BOLD:AAA1576|EU486399  
Microcosmus squamiger|GBGC6031-08||BOLD:AAA1576|EU486316  
Microcosmus squamiger|GBGC6038-08||BOLD:AAA1576|EU486309  
Microcosmus squamiger|GBGC6118-08||BOLD:AAA1576|EU486229  
Microcosmus squamiger|GBGC6040-08||BOLD:AAA1576|EU486307  
Microcosmus squamiger|GBGC6039-08||BOLD:AAA1576|EU486308  
Microcosmus squamiger|GBGC6032-08||BOLD:AAA1576|EU486315  
Microcosmus squamiger|GBGC5998-08||BOLD:AAA1576|EU486349  
Microcosmus squamiger|GBGC6174-08||BOLD:AAA1576|EU486173  
Microcosmus squamiger|GBMIN42960-14|Spain|BOLD:AAA1576|KF309552  
Microcosmus squamiger|GBGC5943-08||BOLD:AAA1576|EU486404  
Microcosmus squamiger|GBGC5949-08||BOLD:AAA1576|EU486398  
Microcosmus squamiger|GBGC5946-08||BOLD:AAA1576|EU486401  
Microcosmus squamiger|GBGC5926-08||BOLD:AAA1576|EU486421  
Microcosmus squamiger|GBGC5928-08||BOLD:AAA1576|EU486419  
Microcosmus squamiger|GBGC5937-08||BOLD:AAA1576|EU486410  
Microcosmus squamiger|GBGC5996-08||BOLD:AAA1576|EU486351  
Microcosmus squamiger|GBGC6003-08||BOLD:AAA1576|EU486344  
Microcosmus squamiger|GBGC6027-08||BOLD:AAA1576|EU486320  
Microcosmus squamiger|GBGC6033-08||BOLD:AAA1576|EU486314  
Microcosmus squamiger|GBGC6035-08||BOLD:AAA1576|EU486312  
Microcosmus squamiger|GBGC6049-08||BOLD:AAA1576|EU486298  
Microcosmus squamiger|GBGC6058-08||BOLD:AAA1576|EU486289  
Microcosmus squamiger|GBGC6062-08||BOLD:AAA1576|EU486285  
Microcosmus squamiger|GBGC6070-08||BOLD:AAA1576|EU486277  
Microcosmus squamiger|GBGC6072-08||BOLD:AAA1576|EU486275  
Microcosmus squamiger|GBGC6079-08||BOLD:AAA1576|EU486268  
Microcosmus squamiger|GBGC6081-08||BOLD:AAA1576|EU486266  
Microcosmus squamiger|GBGC6091-08||BOLD:AAA1576|EU486256  
Microcosmus squamiger|GBGC6149-08||BOLD:AAA1576|EU486198  
Microcosmus squamiger|GBGC6148-08||BOLD:AAA1576|EU486199  
Microcosmus squamiger|GBGC6155-08||BOLD:AAA1576|EU486192  
Microcosmus squamiger|GBGC6111-08||BOLD:AAA1576|EU486236  
Microcosmus squamiger|GBGC6064-08||BOLD:AAA1576|EU486283  
Microcosmus squamiger|GBGC6100-08||BOLD:AAA1576|EU486247





Microcosmus squamiger|GBGC6144-08||BOLD:AAA1576|EU486203  
Microcosmus squamiger|GBGC6145-08||BOLD:AAA1576|EU486202  
Microcosmus squamiger|GBGC6147-08||BOLD:AAA1576|EU486200  
Microcosmus squamiger|GBGC6151-08||BOLD:AAA1576|EU486196  
Microcosmus squamiger|GBGC6152-08||BOLD:AAA1576|EU486195  
Microcosmus squamiger|GBGC6154-08||BOLD:AAA1576|EU486193  
Microcosmus squamiger|GBGC6156-08||BOLD:AAA1576|EU486191  
Microcosmus squamiger|GBGC6158-08||BOLD:AAA1576|EU486189  
Microcosmus squamiger|GBGC6159-08||BOLD:AAA1576|EU486188  
Microcosmus squamiger|GBGC6160-08||BOLD:AAA1576|EU486187  
Microcosmus squamiger|GBGC6164-08||BOLD:AAA1576|EU486183  
Microcosmus squamiger|GBGC6165-08||BOLD:AAA1576|EU486182  
Microcosmus squamiger|GBGC6166-08||BOLD:AAA1576|EU486181  
Microcosmus squamiger|GBGC6167-08||BOLD:AAA1576|EU486180  
Microcosmus squamiger|GBGC6169-08||BOLD:AAA1576|EU486178  
Microcosmus squamiger|GBGC6170-08||BOLD:AAA1576|EU486177  
Microcosmus squamiger|GBGC6171-08||BOLD:AAA1576|EU486176  
Microcosmus squamiger|GBGC6172-08||BOLD:AAA1576|EU486175  
Microcosmus squamiger|GBGC6175-08||BOLD:AAA1576|EU486172  
Microcosmus squamiger|GBGC6055-08||BOLD:AAA1576|EU486292  
Microcosmus squamiger|GBGC6056-08||BOLD:AAA1576|EU486291  
Microcosmus squamiger|GBGC6057-08||BOLD:AAA1576|EU486290  
Microcosmus squamiger|GBGC5922-08||BOLD:AAA1576|EU486425  
Microcosmus squamiger|GBGC6071-08||BOLD:AAA1576|EU486276  
Microcosmus squamiger|GBMIN43041-14|Spain|BOLD:AAA1576|KF309634  
Microcosmus squamiger|GBGC5936-08||BOLD:AAA1576|EU486411  
Microcosmus squamiger|GBGC6060-08||BOLD:AAA1576|EU486287  
Microcosmus squamiger|GBMND3375-21|Japan|BOLD:AAA1576|LC546998  
Microcosmus squamiger|GBMIN43042-14|Spain|BOLD:AAA1576|KF309635  
Microcosmus squamiger|GBMIN43019-14|Spain|BOLD:AAA1576|KF309612  
Microcosmus squamiger|GBMIN42958-14|Spain|BOLD:AAA1576|KF309550  
Microcosmus squamiger|GBMND72169-21|United States|BOLD:AAA1576|MW872265  
Microcosmus squamiger|GBMND72170-21|United States|BOLD:AAA1576|MW872266  
Microcosmus squamiger|GBMNE35421-21||BOLD:AAA1576|MZ882319  
Microcosmus squamiger|GBMNE35430-21||BOLD:AAA1576|MZ882315  
Microcosmus squamiger|GBMNE35440-21||BOLD:AAA1576|MZ882336  
Microcosmus squamiger|GBMNE35441-21||BOLD:AAA1576|MZ882337  
Microcosmus squamiger|GBMNE35442-21||BOLD:AAA1576|MZ882316  
Microcosmus squamiger|GBGC6141-08||BOLD:AAA1576|EU486206  
Microcosmus squamiger|GBGC6142-08||BOLD:AAA1576|EU486205  
Microcosmus squamiger|GBMNE35438-21||BOLD:AAA1576|MZ882334  
Microcosmus squamiger|GBGC5950-08||BOLD:AAA1576|EU486397  
Microcosmus squamiger|GBGC5956-08||BOLD:AAA1576|EU486391  
Microcosmus squamiger|GBGC6133-08||BOLD:AAA1576|EU486214  
Microcosmus squamiger|GBGC5964-08||BOLD:AAA1576|EU486383  
Microcosmus squamiger|GBGC5962-08||BOLD:AAA1576|EU486385  
Microcosmus squamiger|GBGC5972-08||BOLD:AAA1576|EU486375  
Microcosmus squamiger|GBGC6037-08||BOLD:AAA1576|EU486310  
Microcosmus squamiger|GBGC5967-08||BOLD:AAA1576|EU486380  
Microcosmus squamiger|GBGC5977-08||BOLD:AAA1576|EU486370  
Microcosmus squamiger|GBGC5960-08||BOLD:AAA1576|EU486387  
Microcosmus squamiger|GBGC6136-08||BOLD:AAA1576|EU486211  
Microcosmus squamiger|GBGC6134-08||BOLD:AAA1576|EU486213  
Microcosmus squamiger|GBGC6137-08||BOLD:AAA1576|EU486210  
Microcosmus squamiger|GBGC6138-08||BOLD:AAA1576|EU486209  
Microcosmus squamiger|GBGC6139-08||BOLD:AAA1576|EU486208  
Microcosmus squamiger|GBGC5953-08||BOLD:AAA1576|EU486394  
Microcosmus squamiger|GBGC5979-08||BOLD:AAA1576|EU486368  
Microcosmus squamiger|GBGC5978-08||BOLD:AAA1576|EU486369  
Microcosmus squamiger|GBGC5976-08||BOLD:AAA1576|EU486371  
Microcosmus squamiger|GBGC5975-08||BOLD:AAA1576|EU486372  
Microcosmus squamiger|GBGC5974-08||BOLD:AAA1576|EU486373  
Microcosmus squamiger|GBGC5970-08||BOLD:AAA1576|EU486377  
Microcosmus squamiger|GBGC5969-08||BOLD:AAA1576|EU486378  
Microcosmus squamiger|GBGC5968-08||BOLD:AAA1576|EU486379  
Microcosmus squamiger|GBGC5966-08||BOLD:AAA1576|EU486381  
Microcosmus squamiger|GBGC5965-08||BOLD:AAA1576|EU486382  
Microcosmus squamiger|GBGC5961-08||BOLD:AAA1576|EU486386  
Microcosmus squamiger|GBGC5959-08||BOLD:AAA1576|EU486388  
Microcosmus squamiger|GBGC5958-08||BOLD:AAA1576|EU486389  
Microcosmus squamiger|GBGC5957-08||BOLD:AAA1576|EU486390  
Microcosmus squamiger|GBGC5955-08||BOLD:AAA1576|EU486392  
Microcosmus squamiger|GBGC5952-08||BOLD:AAA1576|EU486395  
Microcosmus squamiger|GBGC5932-08||BOLD:AAA1576|EU486415  
Microcosmus squamiger|GBGC5931-08||BOLD:AAA1576|EU486416  
Microcosmus squamiger|GBGC5927-08||BOLD:AAA1576|EU486420  
Microcosmus squamiger|GBGC5925-08||BOLD:AAA1576|EU486422  
Microcosmus squamiger|GBGC5924-08||BOLD:AAA1576|EU486423  
Microcosmus squamiger|GBGC5919-08||BOLD:AAA1576|EU486428  
Microcosmus squamiger|GBGC5963-08||BOLD:AAA1576|EU486384  
Microcosmus squamiger|GBGC5980-08||BOLD:AAA1576|EU486367  
Microcosmus squamiger|GBGC5981-08||BOLD:AAA1576|EU486366  
Microcosmus squamiger|GBGC5982-08||BOLD:AAA1576|EU486365  
Microcosmus squamiger|GBGC6004-08||BOLD:AAA1576|EU486343  
Microcosmus squamiger|GBGC6011-08||BOLD:AAA1576|EU486336  
Microcosmus squamiger|GBGC6025-08||BOLD:AAA1576|EU486322  
Microcosmus squamiger|GBGC6028-08||BOLD:AAA1576|EU486319  
Microcosmus squamiger|GBGC6061-08||BOLD:AAA1576|EU486286  
Microcosmus squamiger|GBGC6066-08||BOLD:AAA1576|EU486281  
Microcosmus squamiger|GBGC6075-08||BOLD:AAA1576|EU486272  
Microcosmus squamiger|GBGC6086-08||BOLD:AAA1576|EU486261  
Microcosmus squamiger|GBGC6093-08||BOLD:AAA1576|EU486254  
Microcosmus squamiger|GBGC6113-08||BOLD:AAA1576|EU486234  
Microcosmus squamiger|GBGC6119-08||BOLD:AAA1576|EU486228  
Microcosmus squamiger|GBGC6120-08||BOLD:AAA1576|EU486227  
Microcosmus squamiger|GBGC6121-08||BOLD:AAA1576|EU486226  
Microcosmus squamiger|GBGC6122-08||BOLD:AAA1576|EU486225  
Microcosmus squamiger|GBGC6123-08||BOLD:AAA1576|EU486224  
Microcosmus squamiger|GBGC6124-08||BOLD:AAA1576|EU486223  
Microcosmus squamiger|GBGC6125-08||BOLD:AAA1576|EU486222  
Microcosmus squamiger|GBGC6126-08||BOLD:AAA1576|EU486221

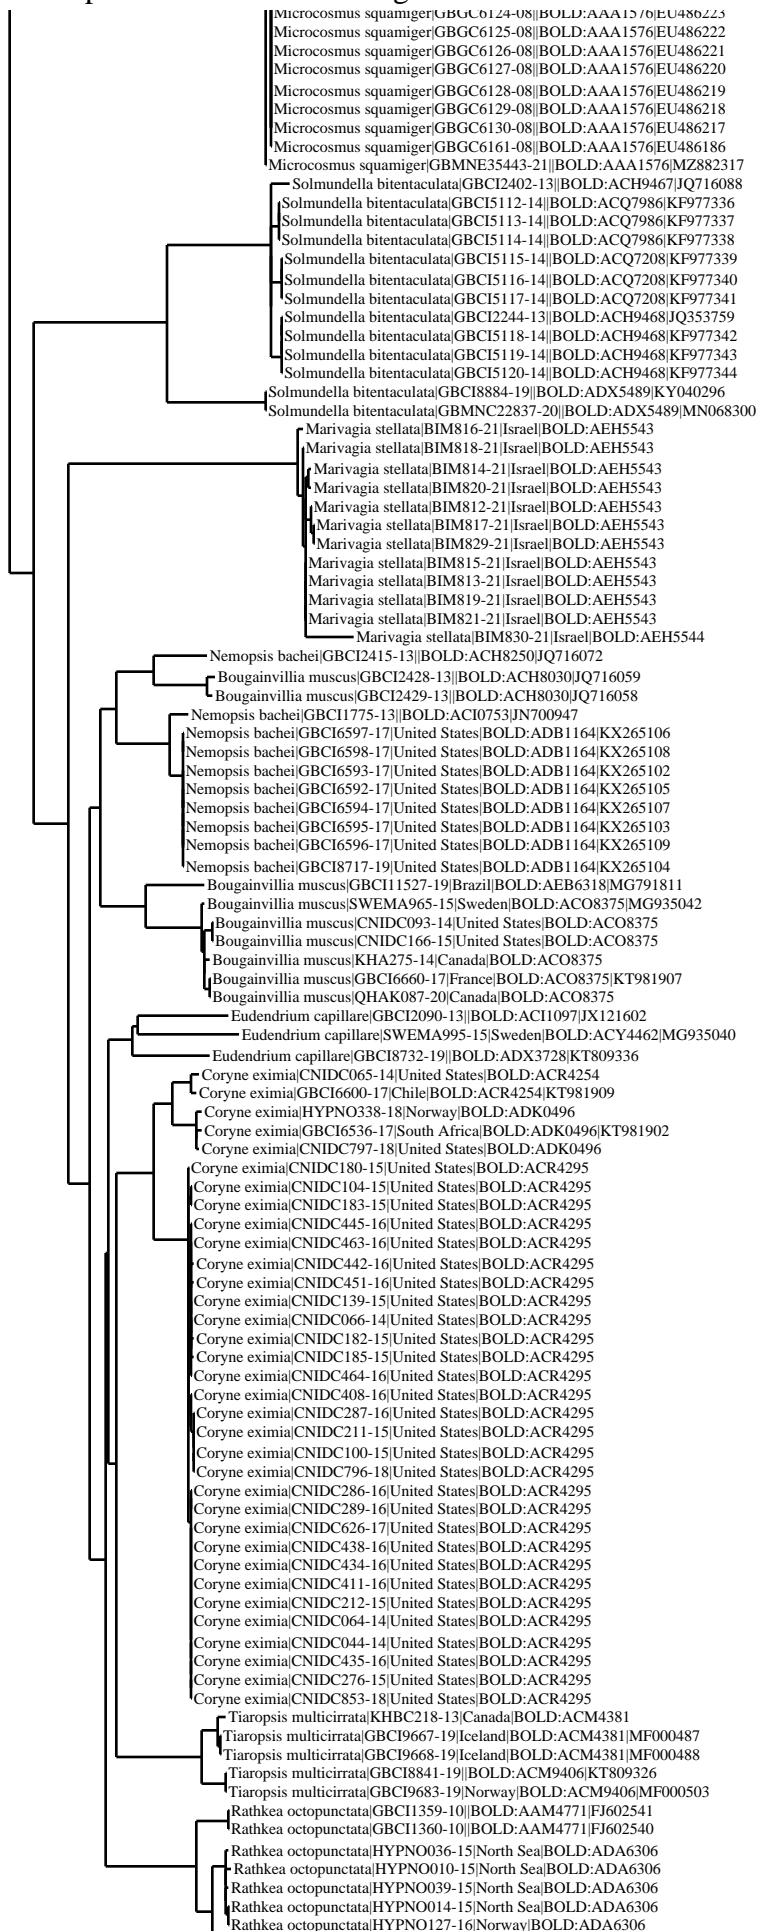

Rathkea octopunctata|HYPNO039-15|North Sea|BOLD:ADA6306  
Rathkea octopunctata|HYPNO014-15|North Sea|BOLD:ADA6306  
Rathkea octopunctata|HYPNO127-16|Norway|BOLD:ADA6306  
Rathkea octopunctata|CAISN1280-13|Canada|BOLD:ACL8220  
Rathkea octopunctata|GBCI8724-19|BOLD:ADX5139|KT809320  
Hydrozoa|QHAK787-21|North Pacific Ocean|BOLD:ADX5139  
Polychaeta|JOD225-15|Jordan|BOLD:ACX9209|KU496530  
Polychaeta|JOD244-15|Jordan|BOLD:ACX9209|KU496526  
Branchiommma bairdi|GBAN17794-19|Mexico|BOLD:ACX9209|MG457408  
Branchiommma bairdi|GBAN17795-19|Mexico|BOLD:ACX9209|MG457409  
Branchiommma bairdi|GBAN17801-19|Mexico|BOLD:ACX9209|MG457415  
Branchiommma bairdi|GBAN17802-19|Mexico|BOLD:ACX9209|MG457416  
Branchiommma bairdi|GBAN17804-19|Mexico|BOLD:ACX9209|MG457418  
Branchiommma bairdi|GBAN17806-19|United States|BOLD:ACX9209|MG457420  
Branchiommma bairdi|GBAN17829-19|Ecuador|BOLD:ACX9209|MG457443  
Branchiommma bairdi|GBAN17759-19|Portugal|BOLD:ACQ9976|MG457400  
Branchiommma bairdi|GBAN17758-19|Mexico|BOLD:ACQ9976|MG457386  
Branchiommma bairdi|GBAN17790-19|United States|BOLD:ACQ9976|MG457404  
Branchiommma bairdi|GBAN17762-19|Mexico|BOLD:ACQ9976|MG457385  
Branchiommma bairdi|GBAN17797-19|Mexico|BOLD:ACQ9976|MG457411  
Annelida|FLFIV300-14|United States|BOLD:ACQ9976|KP254582  
Annelida|FLFIV298-14|United States|BOLD:ACQ9976|KP254457  
Branchiommma bairdi|GBAN17760-19|Portugal|BOLD:ACQ9976|MG457397  
Branchiommma bairdi|GBAN17761-19|Portugal|BOLD:ACQ9976|MG457398  
Branchiommma bairdi|GBAN17763-19|Mexico|BOLD:ACQ9976|MG457372  
Branchiommma bairdi|GBAN17764-19|Mexico|BOLD:ACQ9976|MG457373  
Branchiommma bairdi|GBAN17765-19|Mexico|BOLD:ACQ9976|MG457374  
Branchiommma bairdi|GBAN17766-19|Mexico|BOLD:ACQ9976|MG457375  
Branchiommma bairdi|GBAN17767-19|Mexico|BOLD:ACQ9976|MG457376  
Branchiommma bairdi|GBAN17768-19|Mexico|BOLD:ACQ9976|MG457377  
Branchiommma bairdi|GBAN17769-19|Mexico|BOLD:ACQ9976|MG457378  
Branchiommma bairdi|GBAN17770-19|Mexico|BOLD:ACQ9976|MG457379  
Branchiommma bairdi|GBAN17771-19|Mexico|BOLD:ACQ9976|MG457380  
Branchiommma bairdi|GBAN17772-19|Mexico|BOLD:ACQ9976|MG457381  
Branchiommma bairdi|GBAN17773-19|Mexico|BOLD:ACQ9976|MG457382  
Branchiommma bairdi|GBAN17774-19|Mexico|BOLD:ACQ9976|MG457383  
Branchiommma bairdi|GBAN17775-19|Mexico|BOLD:ACQ9976|MG457384  
Branchiommma bairdi|GBAN17777-19|Portugal|BOLD:ACQ9976|MG457388  
Branchiommma bairdi|GBAN17779-19|Portugal|BOLD:ACQ9976|MG457390  
Branchiommma bairdi|GBAN17789-19|United States|BOLD:ACQ9976|MG457403  
Branchiommma bairdi|GBAN17805-19|United States|BOLD:ACQ9976|MG457419  
Branchiommma bairdi|GBAN17807-19|United States|BOLD:ACQ9976|MG457421  
Branchiommma bairdi|GBAN17811-19|Ecuador|BOLD:ACQ9976|MG457425  
Branchiommma bairdi|GBAN17812-19|Ecuador|BOLD:ACQ9976|MG457426  
Branchiommma bairdi|GBAN17813-19|Ecuador|BOLD:ACQ9976|MG457427  
Branchiommma bairdi|GBAN17814-19|Ecuador|BOLD:ACQ9976|MG457428  
Branchiommma bairdi|GBAN17815-19|Ecuador|BOLD:ACQ9976|MG457429  
Branchiommma bairdi|GBAN17816-19|Ecuador|BOLD:ACQ9976|MG457430  
Branchiommma bairdi|GBAN17817-19|Ecuador|BOLD:ACQ9976|MG457431  
Branchiommma bairdi|GBAN17818-19|Ecuador|BOLD:ACQ9976|MG457432  
Branchiommma bairdi|GBAN17819-19|Ecuador|BOLD:ACQ9976|MG457433  
Branchiommma bairdi|GBAN17820-19|Ecuador|BOLD:ACQ9976|MG457434  
Branchiommma bairdi|GBAN17821-19|Ecuador|BOLD:ACQ9976|MG457435  
Branchiommma bairdi|GBAN17822-19|Ecuador|BOLD:ACQ9976|MG457436  
Branchiommma bairdi|GBAN17823-19|Ecuador|BOLD:ACQ9976|MG457437  
Branchiommma bairdi|GBAN17824-19|Ecuador|BOLD:ACQ9976|MG457438  
Branchiommma bairdi|GBAN17825-19|Ecuador|BOLD:ACQ9976|MG457439  
Branchiommma bairdi|GBAN17826-19|Ecuador|BOLD:ACQ9976|MG457440  
Branchiommma bairdi|GBAN17827-19|Ecuador|BOLD:ACQ9976|MG457441  
Branchiommma bairdi|GBAN17828-19|Ecuador|BOLD:ACQ9976|MG457442  
Branchiommma bairdi|GBAN17830-19|Ecuador|BOLD:ACQ9976|MG457444  
Branchiommma bairdi|GBAN17792-19|United States|BOLD:ACQ9976|MG457406  
Branchiommma bairdi|GBAN17793-19|United States|BOLD:ACQ9976|MG457407  
Branchiommma bairdi|GBAN17798-19|Mexico|BOLD:ACQ9976|MG457412  
Branchiommma bairdi|GBAN17799-19|Mexico|BOLD:ACQ9976|MG457413  
Branchiommma bairdi|GBAN17800-19|Mexico|BOLD:ACQ9976|MG457414  
Branchiommma bairdi|GBAN17803-19|Mexico|BOLD:ACQ9976|MG457417  
Branchiommma bairdi|GBAN17809-19|United States|BOLD:ACQ9976|MG457423  
Branchiommma bairdi|GBAN17831-19|United States|BOLD:ACQ9976|MG457445  
Branchiommma bairdi|GBAN17832-19|United States|BOLD:ACQ9976|MG457446  
Branchiommma bairdi|GBAN17791-19|United States|BOLD:ACQ9976|MG457405  
Branchiommma bairdi|GBAN17788-19|United States|BOLD:ACQ9976|MG457402  
Branchiommma bairdi|GBAN17787-19|United States|BOLD:ACQ9976|MG457401  
Branchiommma bairdi|GBAN17786-19|Portugal|BOLD:ACQ9976|MG457399  
Branchiommma bairdi|GBAN17785-19|Portugal|BOLD:ACQ9976|MG457396  
Branchiommma bairdi|GBAN17784-19|Portugal|BOLD:ACQ9976|MG457395  
Branchiommma bairdi|GBAN17782-19|Portugal|BOLD:ACQ9976|MG457393  
Branchiommma bairdi|GBAN17781-19|Portugal|BOLD:ACQ9976|MG457392  
Branchiommma bairdi|GBAN17780-19|Portugal|BOLD:ACQ9976|MG457391  
Branchiommma bairdi|GBAN17778-19|Portugal|BOLD:ACQ9976|MG457389  
Branchiommma bairdi|GBAN17776-19|Portugal|BOLD:ACQ9976|MG457387  
Branchiommma bairdi|GBAN17796-19|Mexico|BOLD:ACQ9976|MG457410  
Branchiommma|KANBI1399-19|United States|BOLD:ACQ9976  
Branchiommma|GBMND30232-21|United States|BOLD:ACQ9976|MW278718  
Martesia striata|GBMLB5251-13|BOLD:ACH5863|JQ267792  
Martesia striata|GBMLB5727-14|China|BOLD:ACH5863|KJ125424  
Martesia striata|QWEAS1541-15|China|BOLD:ACH5863  
Martesia striata|GBMLB5728-14|China|BOLD:ACH5863|KJ125425  
Martesia striata|QWEAS1542-15|China|BOLD:ACH5863  
Martesia striata|GBMIN106755-17|United States|BOLD:ADF2326|KX713476  
Mytilopsis leucophaeata|GBML8062-19|Brazil|BOLD:ADR5162|MF139836  
Mytilopsis leucophaeata|GBML8063-19|Brazil|BOLD:ADR5162|MF139837  
Mytilopsis leucophaeata|GBML8064-19|Brazil|BOLD:ADR5162|MF139838  
Mytilopsis leucophaeata|GBMNB67776-20|Venezuela|BOLD:ADR5162|MK843803  
Mytilopsis leucophaeata|GBML8071-19|Brazil|BOLD:ADR5162|MF139845  
Mytilopsis leucophaeata|GBML8077-19|Brazil|BOLD:ADR5162|MF139851  
Mytilopsis leucophaeata|GBML8079-19|Brazil|BOLD:ADR5162|MF139853  
Mytilopsis leucophaeata|GBML8086-19|Brazil|BOLD:ADR5162|MF139860  
Mytilopsis leucophaeata|GBML8081-19|Brazil|BOLD:ADR5162|MF139855  
Mytilopsis leucophaeata|GBML8084-19|Brazil|BOLD:ADR5162|MF139858  
Mytilopsis leucophaeata|GBML8091-19|Brazil|BOLD:ADR5162|MF139865

Mytilopsis leucophaeata|GBML8084-19|Brazil|BOLD:ADR5162|MF139858  
Mytilopsis leucophaeata|GBML8091-19|Brazil|BOLD:ADR5162|MF139865  
Mytilopsis leucophaeata|GBMNB67775-20|Venezuela|BOLD:ADR5162|MK843802  
Mytilopsis leucophaeata|GBML8083-19|Brazil|BOLD:ADR5162|MF139857  
Mytilopsis leucophaeata|GBML8074-19|Brazil|BOLD:ADR5162|MF139848  
Mytilopsis leucophaeata|GBML8088-19|Brazil|BOLD:ADR5162|MF139862  
Mytilopsis leucophaeata|GBML8087-19|Brazil|BOLD:ADR5162|MF139861  
Mytilopsis leucophaeata|GBML8085-19|Brazil|BOLD:ADR5162|MF139859  
Mytilopsis leucophaeata|GBML8080-19|Brazil|BOLD:ADR5162|MF139854  
Mytilopsis leucophaeata|GBML8078-19|Brazil|BOLD:ADR5162|MF139852  
Mytilopsis leucophaeata|GBML8076-19|Brazil|BOLD:ADR5162|MF139850  
Mytilopsis leucophaeata|GBML8067-19|Brazil|BOLD:ADR5162|MF139841  
Mytilopsis leucophaeata|GBML8066-19|Brazil|BOLD:ADR5162|MF139840  
Mytilopsis leucophaeata|GBML8089-19|Brazil|BOLD:ADR5162|MF139863  
Mytilopsis leucophaeata|GBML8090-19|Brazil|BOLD:ADR5162|MF139864  
Mytilopsis leucophaeata|GBML8092-19|Brazil|BOLD:ADR5162|MF139866  
Mytilopsis leucophaeata|GBMNB67777-20|Venezuela|BOLD:ADR5162|MK843804  
Mytilopsis leucophaeata|GBML8068-19|Brazil|BOLD:ADR5162|MF139842  
Mytilopsis leucophaeata|GBML8072-19|Brazil|BOLD:ADR5162|MF139846  
Mytilopsis leucophaeata|GBML8073-19|Brazil|BOLD:ADR5162|MF139847  
Mytilopsis leucophaeata|GBMNB67778-20|Venezuela|BOLD:ADR5162|MK843805  
Mytilopsis leucophaeata|GBML8065-19|Brazil|BOLD:ADR5162|MF139839  
Mytilopsis leucophaeata|GBML8069-19|Brazil|BOLD:ADR5162|MF139843  
Mytilopsis leucophaeata|GBML8070-19|Brazil|BOLD:ADR5162|MF139844  
Mytilopsis leucophaeata|GBML8075-19|Brazil|BOLD:ADR5162|MF139849  
Mytilopsis leucophaeata|GBML8082-19|Brazil|BOLD:ADR5162|MF139856  
Mytilopsis leucophaeata|GBMNB67779-20|Venezuela|BOLD:ADR5162|MK843806  
Mytilopsis leucophaeata|GBMIN107716-17|BOLD:AAH4257|KX370820  
Mytilopsis leucophaeata|GBML8093-19|Spain|BOLD:AAH4257|MF401396  
Mytilopsis leucophaeata|GBMLB2748-08|Belgium|BOLD:AAH4257|EF414477  
Mytilopsis leucophaeata|GBMBV2810-14|Iran|BOLD:AAH4257|HM100260  
Mytilopsis leucophaeata|SERC1840-14|United States|BOLD:AAH4257|KU905894  
Mytilopsis leucophaeata|SERC1591-14|United States|BOLD:AAH4257|KU906056  
Mytilopsis leucophaeata|SERC1592-14|United States|BOLD:AAH4257|KU905843  
Mytilopsis leucophaeata|GBMBV2808-14|Iran|BOLD:AAH4257|HM100257  
Mytilopsis leucophaeata|GBMBV2802-14|Germany|BOLD:AAH4257|HM100253  
Mytilopsis leucophaeata|GBMBV2801-14|Germany|BOLD:AAH4257|HM100254  
Mytilopsis leucophaeata|GBMBV2582-14|Belgium|BOLD:AAH4257|HM100251  
Mytilopsis leucophaeata|SERC1590-14|United States|BOLD:AAH4257|KU905904  
Mytilopsis leucophaeata|GBMBV2809-14|Iran|BOLD:AAH4257|HM100258  
Mytilopsis leucophaeata|GBMLB2011-06|BOLD:AAH4257|U47649  
Mytilopsis leucophaeata|SERC1588-14|United States|BOLD:AAH4257|KU905989  
Mytilopsis leucophaeata|OZIMP032-15|Sweden|BOLD:AAH4257  
Mytilopsis leucophaeata|OZIMP033-15|Sweden|BOLD:AAH4257  
Mytilopsis leucophaeata|GBMNB68383-20|Poland|BOLD:AAH4257|MN064628  
Mytilopsis leucophaeata|GBMNC25260-20|Ukraine|BOLD:AAH4257|MT878230  
Mytilopsis leucophaeata|GBMNC25261-20|Ukraine|BOLD:AAH4257|MT878229  
Mytilopsis sallei|GBML8096-19|Brazil|BOLD:ADR7429|MF139869  
Mytilopsis sallei|GBML8108-19|Brazil|BOLD:ADR7429|MF139881  
Mytilopsis sallei|GBML8094-19|Brazil|BOLD:ADR7429|MF139867  
Mytilopsis sallei|GBML8095-19|Brazil|BOLD:ADR7429|MF139868  
Mytilopsis sallei|GBML8106-19|Brazil|BOLD:ADR7429|MF139879  
Mytilopsis sallei|GBML8111-19|Brazil|BOLD:ADR7429|MF139884  
Mytilopsis sallei|GBML8115-19|Brazil|BOLD:ADR7429|MF139888  
Mytilopsis sallei|GBML8116-19|Brazil|BOLD:ADR7429|MF139889  
Mytilopsis sallei|GBML8120-19|Brazil|BOLD:ADR7429|MF139893  
Mytilopsis sallei|GBML8100-19|Brazil|BOLD:ADR7428|MF139873  
Mytilopsis sallei|GBML8101-19|Brazil|BOLD:ADR7428|MF139874  
Mytilopsis sallei|GBML8104-19|Brazil|BOLD:ADR7428|MF139877  
Mytilopsis sallei|GBML8105-19|Brazil|BOLD:ADR7428|MF139878  
Mytilopsis sallei|GBML8099-19|Brazil|BOLD:ADR7428|MF139872  
Mytilopsis sallei|GBML8103-19|Brazil|BOLD:ADR7428|MF139876  
Mytilopsis sallei|GBML8097-19|Brazil|BOLD:ADR7428|MF139870  
Mytilopsis sallei|GBML8114-19|Brazil|BOLD:ADR7428|MF139887  
Mytilopsis sallei|GBML8117-19|Brazil|BOLD:ADR7428|MF139890  
Mytilopsis sallei|GBML8109-19|Brazil|BOLD:ADR7428|MF139882  
Mytilopsis sallei|GBML8113-19|Brazil|BOLD:ADR7428|MF139886  
Mytilopsis sallei|GBML8119-19|Brazil|BOLD:ADR7428|MF139892  
Mytilopsis sallei|GBML8098-19|Brazil|BOLD:ADR7428|MF139871  
Mytilopsis sallei|GBML8102-19|Brazil|BOLD:ADR7428|MF139875  
Mytilopsis sallei|GBML8112-19|Brazil|BOLD:ADR7428|MF139885  
Mytilopsis sallei|GBML8107-19|Brazil|BOLD:ADR7428|MF139880  
Mytilopsis sallei|GBML8110-19|Brazil|BOLD:ADR7428|MF139883  
Mytilopsis sallei|GBML8118-19|Brazil|BOLD:ADR7428|MF139891  
Mytilopsis sallei|GBML8121-19|Brazil|BOLD:ADR7428|MF139894  
Mytilopsis sallei|CAZUL224-17|Mexico|BOLD:ABW8014|MT888365  
Mytilopsis sallei|CAZUL222-17|Mexico|BOLD:ABW8014|MT888367  
Mytilopsis sallei|CAZUL221-17|Mexico|BOLD:ABW8014|MT888455  
Mytilopsis sallei|BACZP116-15|Mexico|BOLD:ABW8014|MG448907  
Mytilopsis sallei|BACZP114-15|Mexico|BOLD:ABW8014|MG449211  
Mytilopsis sallei|BACZP113-15|Mexico|BOLD:ABW8014|MG448863  
Mytilopsis sallei|BACZP112-15|Mexico|BOLD:ABW8014|MG449704  
Bivalvia|GBMLB5572-13|Mexico|BOLD:ABW8014|KC617237  
Bivalvia|ZMIII799-12|Mexico|BOLD:ABW8014  
Mytilopsis sallei|CAZUL129-17|Mexico|BOLD:ABW8014|MT888382  
Mytilopsis sallei|CAZUL223-17|Mexico|BOLD:ABW8014|MT888271  
Mytilopsis sallei|CAZUL225-17|Mexico|BOLD:ABW8014|MT888273  
Mytilopsis sallei|BACZP115-15|Mexico|BOLD:ABW8014|MG448855  
Mytilopsis sallei|CAZUL226-17|Mexico|BOLD:ABW8014|MT888447  
Mytilopsis sallei|ZPLV270-18|Guatemala|BOLD:ABW8014  
Mytilopsis sallei|ZPLV267-18|Guatemala|BOLD:ABW8014  
Mytilopsis sallei|ZPLV268-18|Guatemala|BOLD:ABW8014  
Mytilopsis sallei|ZPLV266-18|Guatemala|BOLD:ABW8014  
Mytilopsis sallei|ZPLV269-18|Guatemala|BOLD:ABW8014  
Mytilopsis sallei|ZPLV271-18|Guatemala|BOLD:ABW8014  
Mytilopsis sallei|ZPLV272-18|Guatemala|BOLD:ABW8014  
Mytilopsis sallei|ZPLV273-18|Guatemala|BOLD:ABW8014  
Mytilopsis sallei|ZPLV274-18|Guatemala|BOLD:ABW8014  
Mytilopsis sallei|GBMLB4004-09|BOLD:AAA5806|FJ696686  
Mytilopsis sallei|GBMBV1881-13|China|BOLD:AAA5806|JX099435  
Mytilopsis sallei|GBMLB4010-09|BOLD:AAA5806|FJ696680

Mytilopsis sallei|GBMLB4004-09||BOLD:AAA5806|FJ696686  
Mytilopsis sallei|GBMBV1881-13|China|BOLD:AAA5806|JX099435  
Mytilopsis sallei|GBMLB4010-09||BOLD:AAA5806|FJ696680  
Mytilopsis sallei|GBMLB4009-09||BOLD:AAA5806|FJ696681  
Mytilopsis sallei|GBMLB4003-09||BOLD:AAA5806|FJ696687  
Mytilopsis sallei|GBMLB3999-09||BOLD:AAA5806|FJ696691  
Mytilopsis sallei|GBMLB2965-08||BOLD:AAA5806|EU780672  
Mytilopsis sallei|OZIMP031-15|Australia|BOLD:AAA5806  
Mytilopsis sallei|GBMLB4002-09||BOLD:AAA5806|FJ696688  
Mytilopsis sallei|GBMLB4001-09||BOLD:AAA5806|FJ696689  
Mytilopsis sallei|GBMLB3990-09||BOLD:AAA5806|FJ696700  
Mytilopsis sallei|GBMLB4011-09||BOLD:AAA5806|FJ696679  
Mytilopsis sallei|GBMLB4033-09||BOLD:AAA5806|FJ696657  
Mytilopsis sallei|GBMLB4035-09||BOLD:AAA5806|FJ696655  
Mytilopsis sallei|GBMLB4025-09||BOLD:AAA5806|FJ696665  
Mytilopsis sallei|GBMLB4031-09||BOLD:AAA5806|FJ696659  
Mytilopsis sallei|GBMLB4023-09||BOLD:AAA5806|FJ696667  
Mytilopsis sallei|GBMLB4024-09||BOLD:AAA5806|FJ696666  
Mytilopsis sallei|GBMLB4021-09||BOLD:AAA5806|FJ696669  
Mytilopsis sallei|GBMLB4022-09||BOLD:AAA5806|FJ696668  
Mytilopsis sallei|GBMLB4018-09||BOLD:AAA5806|FJ696672  
Mytilopsis sallei|GBMLB4020-09||BOLD:AAA5806|FJ696670  
Mytilopsis sallei|GBMLB4036-09||BOLD:AAA5806|FJ696654  
Mytilopsis sallei|GBMLB4017-09||BOLD:AAA5806|FJ696673  
Mytilopsis sallei|GBMLB4016-09||BOLD:AAA5806|FJ696674  
Mytilopsis sallei|GBMLB4015-09||BOLD:AAA5806|FJ696675  
Mytilopsis sallei|GBMLB4007-09||BOLD:AAA5806|FJ696683  
Mytilopsis sallei|GBMLB4006-09||BOLD:AAA5806|FJ696684  
Mytilopsis sallei|GBMLB4000-09||BOLD:AAA5806|FJ696690  
Mytilopsis sallei|GBMLB3995-09||BOLD:AAA5806|FJ696695  
Mytilopsis sallei|GBMLB3994-09||BOLD:AAA5806|FJ696696  
Mytilopsis sallei|GBMLB3993-09||BOLD:AAA5806|FJ696697  
Mytilopsis sallei|GBMLB3989-09||BOLD:AAA5806|FJ696701  
Mytilopsis sallei|BIM1022-21|Israel|BOLD:AAA5806  
Mytilopsis sallei|GBMND8485-21|Thailand|BOLD:AAA5806|MN720723  
Mytilopsis sallei|GBMND8486-21|Thailand|BOLD:AAA5806|MN720724  
Mytilopsis sallei|GBMND8483-21|Thailand|BOLD:AAA5806|MN720721  
Mytilopsis sallei|GBMND8484-21|Thailand|BOLD:AAA5806|MN720722  
Mytilopsis sallei|GBMND8487-21|Thailand|BOLD:AAA5806|MN720725  
Mytilopsis sallei|GBMND8488-21|Thailand|BOLD:AAA5806|MN720726  
Mytilopsis sallei|GBMND8489-21|Thailand|BOLD:AAA5806|MN720727  
Mytilopsis sallei|GBMND8490-21|Thailand|BOLD:AAA5806|MN720728  
Mytilopsis sallei|GBMND8491-21|Thailand|BOLD:AAA5806|MN720729  
Mytilopsis sallei|GBMND8492-21|Thailand|BOLD:AAA5806|MN720730  
Mytilopsis sallei|BIM1019-21|Israel|BOLD:AAA5806  
Mytilopsis sallei|BIM1023-21|Israel|BOLD:AAA5806  
Mytilopsis sallei|BIM1026-22|Israel|BOLD:AAA5806  
Mytilopsis sallei|GBMLB3991-09||BOLD:AAA5806|FJ696699  
Mytilopsis sallei|GBMLB4032-09||BOLD:AAA5806|FJ696658  
Mytilopsis sallei|GBMLB4034-09||BOLD:AAA5806|FJ696656  
Mytilopsis sallei|GBMLB4029-09||BOLD:AAA5806|FJ696661  
Mytilopsis sallei|GBMLB4030-09||BOLD:AAA5806|FJ696660  
Mytilopsis sallei|GBMLB4028-09||BOLD:AAA5806|FJ696662  
Mytilopsis sallei|GBMLB4027-09||BOLD:AAA5806|FJ696663  
Mytilopsis sallei|GBMLB4026-09||BOLD:AAA5806|FJ696664  
Mytilopsis sallei|GBMLB4019-09||BOLD:AAA5806|FJ696671  
Mytilopsis sallei|GBMLB4014-09||BOLD:AAA5806|FJ696676  
Mytilopsis sallei|GBMLB4013-09||BOLD:AAA5806|FJ696677  
Mytilopsis sallei|GBMLB4012-09||BOLD:AAA5806|FJ696678  
Mytilopsis sallei|GBMLB4008-09||BOLD:AAA5806|FJ696682  
Mytilopsis sallei|GBMLB4005-09||BOLD:AAA5806|FJ696685  
Mytilopsis sallei|GBMLB3998-09||BOLD:AAA5806|FJ696692  
Mytilopsis sallei|GBMLB3996-09||BOLD:AAA5806|FJ696694  
Mytilopsis sallei|BIM1020-21|Israel|BOLD:AAA5806  
Mytilopsis sallei|GBMLB3997-09||BOLD:AAA5806|FJ696693  
Mytilopsis sallei|GBMLB3992-09||BOLD:AAA5806|FJ696698  
Mytilopsis sallei|BIM1017-21|Israel|BOLD:AAA5806  
Mytilopsis sallei|BIM1021-21|Israel|BOLD:AAA5806  
Mytilopsis sallei|BIM1025-22|Israel|BOLD:AAA5806  
Mytilopsis sallei|BIM1024-22|Israel|BOLD:AAA5806  
Mytilopsis sallei|BIM1027-22|Israel|BOLD:AAA5806  
Atrina rigida|GBMLB5959-14||BOLD:ACQ0207|KJ366366  
Atrina rigida|GBMLB5948-14||BOLD:ACQ0207|KJ366343  
Atrina rigida|GBMLB5950-14||BOLD:ACQ0207|KJ366345  
Atrina rigida|GBMLB5942-14||BOLD:ACQ0207|KJ366334  
Atrina rigida|GBMLB5944-14||BOLD:ACQ0207|KJ366339  
Atrina rigida|GBMLB5945-14||BOLD:ACQ0207|KJ366340  
Atrina rigida|GBMLB5947-14||BOLD:ACQ0207|KJ366342  
Atrina rigida|GBMLB5949-14||BOLD:ACQ0207|KJ366344  
Atrina rigida|GBMLB5952-14||BOLD:ACQ0207|KJ366348  
Atrina rigida|GBMLB5953-14||BOLD:ACQ0207|KJ366351  
Atrina rigida|GBMLB5955-14||BOLD:ACQ0207|KJ366357  
Atrina rigida|GBMLB5957-14||BOLD:ACQ0207|KJ366362  
Atrina rigida|GBMLB5958-14||BOLD:ACQ0207|KJ366363  
Atrina rigida|GBMLB5960-14||BOLD:ACQ0207|KJ366367  
Atrina rigida|GBMLB5962-14||BOLD:ACQ0207|KJ366387  
Atrina rigida|GBMLB5940-14||BOLD:ACQ0207|KJ366328  
Atrina rigida|GBMLB5946-14||BOLD:ACQ0207|KJ366341  
Atrina rigida|GBMLB5941-14||BOLD:ACQ0207|KJ366333  
Atrina rigida|GBMLB5951-14||BOLD:ACQ0207|KJ366346  
Atrina rigida|GBMLB5956-14||BOLD:ACQ0207|KJ366361  
Atrina rigida|GBMLB5965-14||BOLD:ACQ0207|KJ366448  
Atrina rigida|GBMLB5964-14||BOLD:ACQ0207|KJ366442  
Atrina rigida|GBMLB5966-14||BOLD:ACQ0207|KJ366460  
Atrina rigida|GBMLB5943-14||BOLD:ACQ0207|KJ366335  
Atrina rigida|GBMLB5954-14||BOLD:ACQ0207|KJ366355  
Atrina rigida|GBMLB5967-14||BOLD:ACQ0207|KJ366468  
Atrina rigida|GBMLB5961-14||BOLD:ACQ0206|KJ366378  
Atrina rigida|GBMLB5963-14||BOLD:ACQ0206|KJ366389  
Atrina rigida|GBMIN99649-17|United States|BOLD:ACQ0206|KX713446
